# Supplementary material for: Comparative effects of different whole grains and brans on blood lipid: a network meta-analysis
Source: Springer Nature journal article supplement (doi:10.1007/s00394-018-1827-6), 2018-09-22
Supplement: MOESM1 [file 16145406]

---

## SUPPLEMENTARY MATERIALS

**Journal name:** European Journal of Nutrition

**Title:** Comparative effects of different whole grains and brans on blood lipid: a network meta-analysis

**Author Names:** Suocheng Hui<sup>1</sup>, Kai Liu<sup>1,2</sup>, Hedong Lang<sup>1</sup>, Yang Liu<sup>1</sup>, Xiaolan Wang<sup>1</sup>, Xiaohui Zhu<sup>1</sup>, Steve Doucette<sup>3</sup>, Long Yi<sup>1</sup>, Mantian Mi<sup>1</sup>

Suocheng Hui and Kai Liu contributed equally to this work.

**Address correspondence to** M-TM, Research Center for Nutrition and Food Safety, Institute of Military Preventive Medicine, the Third Military Medical University, Chongqing Key Laboratory of Nutrition and Food Safety, Chongqing Medical Nutrition Research Center, Chongqing 400038, P. R. China. Tel: +86 2368752305, Fax: +86 2368752305, E-mail address: mi\_mt2009@hotmail.com.

---

## **Comparative effects of different whole grains and brans on blood lipid: a study protocol for network meta-analysis**

### **BACKGROUND**

Cardiovascular diseases (CVDs) were estimated to the cause of 17.3 million deaths every year, accounting for nearly 50% of global deaths, which have brought heavy burden to the public health globally [1-3]. Abnormalities of lipid metabolism are important risk factors of CVDs, recent studies have indicated that 1% decrease in total cholesterol (TC) and LDL cholesterol (LDL-C) has been shown to reduce risk of CVD by 3% and 1% respectively [4].

Dietary therapy is showing great bright future in improving lipid status [5]. Whole grain diet is frequently encouraged for the prevention and treatment of CVDs [6]. Accumulating evidence has suggested that whole grains and bran consumption are inversely associated with lipid profile [7]. However, the results of clinical trials investigating the effects of whole grains on the blood lipids in humans are still inconsistent [8].

Whole grain is defined to contain bran, germ, and endosperm, and these three parts are still present in their natural proportions [9]. During the grain-refining process, the bran and germ of whole grain is removed from the starchy endosperm and the latter is ground into flour. At the same time, fiber, minerals, vitamins and other phytochemicals of mainly contained in whole grain bran are removed during milling processes [9]. In addition, results of large prospective cohort studies have indicated the significant association between whole grains especially their subcomponent brans and risk of cardiovascular diseases [7, 10]. However, there is no individual RCT investigating the comparative effects of different whole grains and brans on blood lipid.

To adequately assess the comparative effectiveness of different whole grains and brans on the control

---

of blood lipid, we will conduct a frequentist model network meta-analysis, which will treat every kind of whole grains and bran as separate treatment and incorporates both direct and indirect comparisons of treatment strategies while synthesizing all available data [11, 12]. Besides, our network meta-analysis will rank the relative effects of different whole grains and bran on the control of blood lipid.

## **OBJECTIVES**

To estimate and rank the comparative effects of different whole grains and brans on the control of blood lipid.

## **METHODS**

### *Criteria for considering studies for this review*

#### **Types of studies**

Any clinical trials evaluating the comparative effects of different whole grains and brans on lipids in healthy or high-risk of CVDs population will be included.

#### **Types of participants**

Apparently healthy or high-risk CVDs population (subjects with known dyslipidemia, hyperglycemia, hypertension, overweight or obesity, or a combination of these factors) and not diagnosed with CVDs will be considered eligible for inclusion.

#### **Types of interventions**

Participants receive the treatment products of barley, brown rice, oat, oat bran, rye, rye bran, wheat, wheat bran alone or refined-grain diets or products and the effects of whole grains and brans could be distinguished. Intervention duration lasted more than 2 weeks.

### ***Search methods for identification of studies***

#### **Electronic searches**

The structured search strategies will use the text key words *whole grain, grain, wholegrain, whole meal, whole wheat, wheat, rice, maize, oat, barley, corn, rye, millet, sorghum, triticale, canary seed, amaranth, buckwheat, quinoa*, which will be paired with the following words: *lipid profile, lipid distribution, blood lipid, cholesterol, total cholesterol, TC, low density lipoprotein, LDL, LDL-C, high density lipoprotein, HDL, HDL-C, triglyceride, triacylglycerol, triglyceride, TG, TAG, lipoprotein*. The search will be restricted to the reports of clinical trials conducted in human subjects. Literature search will be executed in three databases:

1. PubMed (<http://www.ncbi.nlm.nih.gov/pubmed/>);
2. Embase (<http://www.embase.com/search/advanced/>);
3. The Cochrane Library (<http://www.cochrane.org/>).

#### ***Selection of studies***

The search strategy described will be used to obtain titles and abstracts of studies that may be relevant to the review. Two authors will independently complete the screening of the titles and abstracts of articles retrieved. After primary screening, the full text of articles retained from screening will then be obtained and those that meet the eligible criteria will be included.

#### ***Data extraction and management***

#### **Outcome data**

Two independent reviewers will extract from each included study for change scores or baseline and post-intervention values of TC, LDL-C, HDL cholesterol (HDL-C), and triglycerides (TG). For crossover design trials, we will extract the data of two phases. In parallel design studies, all treatment outcomes at different visits will be extracted and used to estimate the intervention effects. Data will be cross checked between authors and any discrepancies will be resolved by discussion with a third author.

#### **Data on study characteristics**

The following characteristics will be extracted from each study:

- 1) Information of authors, publication year, region, sample size, study design and funding source;
- 2) Treatment duration, treatment products, and dietary fiber content of intervention products;
- 3) Population information on age and body mass index (BMI).

#### ***Assessment of risk of bias in included studies***

The risk of bias will be assessed using the Cochrane Risk of Bias assessment tool. The assessment items included adequacy of sequence generation, allocation concealment, blinding, blinding of outcome assessments, incomplete outcome data, selective reporting, and other biases [13]. Two researchers will review the studies and judge the risk of bias independently. And any discrepancies will be resolved by consensus and arbitration by a third investigator.

#### ***Assessment of quality of evidence***

The quality of evidence will be assessed using the Grading of Recommendations Assessment, Development and Evaluation (GRADE) framework, which characterizes the evidence on the basis of

---

the study limitations, imprecision, inconsistency, indirectness, and publication bias [14].

### *Data synthesis*

#### **Methods for direct treatment comparisons**

First, pairwise meta-analyses will be conducted by synthesizing studies that compared interventions head-to-head using a random-effects model to estimate the treatment effects [15]. We will calculate  $I^2$  statistic and  $P$  value to identify the heterogeneity among the included studies [16]. In addition, we will use the Egger's test to detect the small-study effects. The pairwise meta-analysis will be conducted using meta package for R software.

#### **Methods for indirect and mixed comparisons**

Frequentist model network meta-analyses will be conducted to estimate the comparative effects of different whole grains and brans on the control of blood lipid if at least five treatments arms are available across the studies [17].

We will perform meta-analysis in STATA (StataCorp. 2011. Stata Statistical Software: Release 14. College Station, TX) using the mvmeta command [16] and Stata routines described elsewhere [11], which are available at <http://www.mtm.uoi.gr/index.php/stata-routines-for-network-meta-analysis>.

### *Measures of treatment effect*

#### **Relative treatment effects**

The outcomes of treatments for pairwise and network meta-analysis will be estimated using mean differences (MDs).

#### **Relative treatment ranking**

---

We will estimate the ranking probabilities for all treatments of being at each possible rank for each intervention and each outcome. A treatment hierarchy will be obtained by the surface under the cumulative ranking curve (SUCRA) and mean ranks. SUCRA can also be expressed as a percentage interpreted as the percentage of efficacy of a treatment that would be ranked first without uncertainty [11].

#### *Assessment of transitivity across treatment comparisons*

The fundamental premise underlying network meta-analysis is transitivity [12, 18, 19]. In this study, we will evaluate whether the transitivity assumption is valid by assessing the inconsistency between direct and indirect evidence.

#### *Assessment of statistical heterogeneity*

##### **Local approaches for evaluating inconsistency**

The presence of local inconsistency will be evaluated using the loop-specific approach [20, 21], and the results of this approach will be presented graphically in a forest plot using the ifplot command in STATA.14.0 [11]. To infer whether the inconsistency factor is incompatible with zero, we will look at the 95% confidence interval and a loop-specific z-test.

##### **Global approaches for evaluating inconsistency**

We will use the design-by-treatment interaction model to check the assumption of consistency in the entire network. Using this approach we will infer about the presence of inconsistency from any source in the entire network based on a chi-square test. The design-by-treatment interaction model will be performed in STATA using the mvmeta command [22].

***Sensitivity analysis***

To assess the robustness of our findings, we will perform sensitivity analysis by fitting the inconsistency model. In addition, other sensitivity analysis will be conducted according to baseline lipid level, study design, duration of follow-up and risk of bias.

***Other analysis***

We will use the comparison-adjusted funnel plot to visually assess the evidence for publication bias in the network [11].



---

**REFERENCE**

1. New initiative launched to tackle cardiovascular disease, the world's number one killer. Version current 22 September, 2016. Internet: [http://www.who.int/cardiovascular\\_diseases/en/](http://www.who.int/cardiovascular_diseases/en/). (accessed 2016 June 17th).
2. (2015) Global, regional, and national age-sex specific all-cause and cause-specific mortality for 240 causes of death, 1990-2013: a systematic analysis for the Global Burden of Disease Study 2013. *Lancet* (London, England) 385:117-171. doi 10.1016/s0140-6736(14)61682-2.
3. Smith SC, Jr., Collins A, Ferrari R, Holmes DR, Jr., Logstrup S, McGhie DV, Ralston J, Sacco RL, Stam H, Taubert K, Wood DA, Zoghbi WA (2012) Our time: a call to save preventable death from cardiovascular disease (heart disease and stroke). *J Am Coll Cardiol* 60:2343-2348. doi 10.1016/j.jacc.2012.08.962.
4. (2002) Third Report of the National Cholesterol Education Program (NCEP) Expert Panel on Detection, Evaluation, and Treatment of High Blood Cholesterol in Adults (Adult Treatment Panel III) final report. *Circulation* 106:3143-3421.
5. Stoes ES, Thompson PD, Corsini A, Vladutiu GD, Raal FJ, Ray KK, Roden M, Stein E, Tokgozoglul L, Nordestgaard BG, Bruckert E, De Backer G, Krauss RM, Laufs U, Santos RD, Hegele RA, Hovingh GK, Leiter LA, Mach F, Marz W, Newman CB, Wiklund O, Jacobson TA, Catapano AL, Chapman MJ, Ginsberg HN (2015) Statin-associated muscle symptoms: impact on statin therapy-European Atherosclerosis Society Consensus Panel Statement on Assessment, Aetiology and Management. *Eur Heart J* 36:1012-1022. doi 10.1093/eurheartj/ehv043.
6. Chen GC, Tong X, Xu JY, Han SF, Wan ZX, Qin JB, Qin LQ (2016) Whole-grain intake and total, cardiovascular, and cancer mortality: a systematic review and meta-analysis of prospective studies. *The American journal of clinical nutrition* 104:164-172. doi 10.3945/ajcn.115.122432.
7. Zong G, Gao A, Hu FB, Sun Q (2016) Whole Grain Intake and Mortality From All Causes, Cardiovascular Disease, and Cancer: A Meta-Analysis of Prospective Cohort Studies. *Circulation* 133:2370-2380. doi 10.1161/circulationaha.115.021101.
8. Hollaender PL, Ross AB (2015) Whole-grain and blood lipid changes in apparently healthy adults: a systematic review and meta-analysis of randomized controlled studies. *102:556-572*. doi 10.3945/ajcn.115.109165.
9. Slavin JL, Martini MC, Jacobs DR, Jr., Marquart L (1999) Plausible mechanisms for the protectiveness of whole grains. *The American journal of clinical nutrition* 70:459s-463s.
10. Aune D, Keum N, Giovannucci E, Fadnes LT, Boffetta P, Greenwood DC, Tonstad S, Vatten LJ, Riboli E, Norat T (2016) Whole grain consumption and risk of cardiovascular disease, cancer, and all cause and cause specific mortality: systematic review and dose-response meta-analysis of prospective studies. *BMJ (Clinical research ed.)* 353:i2716. doi 10.1136/bmj.i2716.
11. Chaimani A, Higgins JP, Mavridis D, Spyridonos P, Salanti G (2013) Graphical tools for network meta-analysis in STATA. *PloS one* 8:e76654. doi 10.1371/journal.pone.0076654.
12. Salanti G (2012) Indirect and mixed-treatment comparison, network, or multiple-treatments meta-analysis: many names, many benefits, many concerns for the next generation evidence synthesis tool. *Research synthesis methods* 3:80-97. doi 10.1002/jrsm.1037.
13. Higgins J, Green S, editors. Chapter 8: Assessing risk of bias in included studies. *Cochrane Handbook for Systematic Reviews of Interventions*. The Cochrane Collaboration. Version 5.1.0 (updated March 2011); 2011
14. Salanti G, Del Giovane C, Chaimani A, Caldwell DM, Higgins JP (2014) Evaluating the quality of

- 
- evidence from a network meta-analysis. *PloS one* 9:e99682. doi 10.1371/journal.pone.0099682.
15. DerSimonian R, Laird N (1986) Meta-analysis in clinical trials. *Control Clin Trials* 7:177-188.
  16. Higgins JP, Thompson SG, Deeks JJ, Altman DG (2003) Measuring inconsistency in meta-analyses. *BMJ (Clinical research ed.)* 327:557-560. doi 10.1136/bmj.327.7414.557.
  17. Tricco AC, Ashoor HM, Antony J, Beyene J, Veroniki AA, Isaranuwachai W, Harrington A, Wilson C, Tsouros S, Soobiah C, Yu CH, Hutton B, Hoch JS, Hemmelgarn BR, Moher D, Majumdar SR, Straus SE (2014) Safety, effectiveness, and cost effectiveness of long acting versus intermediate acting insulin for patients with type 1 diabetes: systematic review and network meta-analysis. *BMJ (Clinical research ed.)* 349:g5459. doi 10.1136/bmj.g5459.
  18. Cipriani A, Higgins JP, Geddes JR, Salanti G (2013) Conceptual and technical challenges in network meta-analysis. *Ann Intern Med* 159:130-137. doi 10.7326/0003-4819-159-2-201307160-00008.
  19. Jansen JP, Naci H (2013) Is network meta-analysis as valid as standard pairwise meta-analysis? It all depends on the distribution of effect modifiers. *BMC medicine* 11:159. doi 10.1186/1741-7015-11-159.
  20. Bucher HC, Guyatt GH, Griffith LE, Walter SD (1997) The results of direct and indirect treatment comparisons in meta-analysis of randomized controlled trials. *Journal of clinical epidemiology* 50:683-691.
  21. Salanti G, Marinho V, Higgins JP (2009) A case study of multiple-treatments meta-analysis demonstrates that covariates should be considered. *Journal of clinical epidemiology* 62:857-864. doi 10.1016/j.jclinepi.2008.10.001.
  22. White IR, Barrett JK, Jackson D, Higgins JP (2012) Consistency and inconsistency in network meta-analysis: model estimation using multivariate meta-regression. *Research synthesis methods* 3:111-125. doi 10.1002/jrsm.1045.

---

## Supplemental materials and methods

### Literature search

Full search strategy for Pubmed: (((((((((((((((((((lipid profile) OR lipid distribution) OR blood lipid) OR cholesterol) OR total cholesterol) OR TC) OR low density lipoprotein) OR LDL) OR LDL-C) OR high density lipoprotein) OR HDL) OR HDL-C) OR triglyceride) OR triacylglycerol) OR triglyceride) OR TG) OR TAG) OR lipoprotein)) AND (((((((((((((((((((whole grain) OR grain) OR wholegrain) OR whole meal) OR whole wheat) OR wheat) OR rice) OR maize) OR oat) OR barley) OR corn) OR rye) OR millet) OR sorghum) OR triticale) OR canary seed) OR amaranth) OR buckwheat) OR quinoa)) AND "humans"[MeSH Terms].

**Supplemental Table 1** Characteristics of eligible studies<sup>a</sup>

| Author, publication year, country<br>(reference) | No. of<br>subjects | Age <sup>b</sup> (years) | BMI <sup>b</sup><br>(kg/m <sup>2</sup> ) | Study<br>design | Duration<br>(weeks) | Intervention products                                        | Dietary fiber content of<br>intervention products (g/day) |
|--------------------------------------------------|--------------------|--------------------------|------------------------------------------|-----------------|---------------------|--------------------------------------------------------------|-----------------------------------------------------------|
| Beck, 2010, Australia [1]                        | 56                 | 37.4 (5.8)               | 29.3 (2.2)                               | Parallel        | 12                  | Oat bran ready-to-eat cereal,<br>muesli bars and snack packs | Oat bran: 7.0, 18.9                                       |
| Berg, 2003, Germany [2]                          | 152                | 53.2 (6.5)               | 30.3 (1.9)                               | Parallel        | 4                   | Oat bran bread, rolls, sauces and<br>desserts                | Oat bran: NR                                              |
| Bremer, 1991, New Zealand [3]                    | 12                 | 53.0 (10.0)              | NR                                       | Crossover       | 4                   | Oat bran bread;<br>Wheat bran bread                          | Oat bran: 12.9;<br>Wheat bran: 15.3                       |
| Chang, 2013, Taiwan [4]                          | 34                 | 38.5 (11.2)              | 29.4 (2.4)                               | Parallel        | 12                  | Oat cereal supplements<br>Oat porridge and oat-based cereal  | Oat: NR                                                   |
| Charlton, 2012, Australia [5]                    | 90                 | 51.3 (10.3)              | 27.3 (4.3)                               | Parallel        | 6                   | bars                                                         | Oat: 8.6, 4.3                                             |
| Chen, 2006, United States [6]                    | 102                | 47.9 (8.4)               | 28.9 (4.6)                               | Parallel        | 12                  | Oat bran concentrated muffin                                 | Oat bran: 15.9<br>Oat: 2.3, 4.5, 8.2;                     |
| Davidson, 1991, United States [7]                | 140                | 52.7 (NR)                | 25.4 (NR)                                | Parallel        | 12                  | Oatmeal and oat bran supplements<br>Oat bran cold cereal;    | Oat bran: 4.1, 6.8, 12.3<br>Oat: 14.0;                    |
| Davy, 2002, United States [8]                    | 36                 | 59.0 (8.4)               | 29.4 (3.4)                               | Parallel        | 12                  | Whole wheat hot cereal                                       | Wheat: 14.0                                               |
| Gerhardt, 1998, United States [9]                | 30                 | 51.7 (1.5)               | 24.4 (NR)                                | Parallel        | 6                   | Oat bran products<br>Whole wheat bread, pasta, rusks,        | Oat bran: 8.3                                             |
| Giacco, 2009, Italy [10]                         | 15                 | 54.5 (7.6)               | 27.4 (3.0)                               | Crossover       | 3                   | and crackers<br>Oat bran muffins;                            | Wheat: 22.0<br>Oat bran: 10.0;                            |
| Gold, 1988, United States [11]                   | 72                 | 25.7 (3.2)               | NR                                       | Parallel        | 4                   | Whole wheat muffins<br>Barley bread;                         | Wheat: 11.0<br>Barley: 9.0;                               |
| Hajifaraji, 2012, Iran [12]                      | 39                 | 52.6 (6.6)               | 26.7 (4.6)                               | Parallel        | 3                   | Oat bread                                                    | Oat: 10.0                                                 |

**Supplemental Table 1** Continued

| Author, publication year, country<br>(reference) | No. of<br>subjects | Age <sup>b</sup> (years) | BMI <sup>b</sup><br>(kg/m <sup>2</sup> ) | Study<br>design | Duration<br>(weeks) | Intervention products                             | Dietary fiber content of<br>intervention products (g/day) |
|--------------------------------------------------|--------------------|--------------------------|------------------------------------------|-----------------|---------------------|---------------------------------------------------|-----------------------------------------------------------|
| Jenkins, 1993, Canada [13]                       | 67                 | 56.6 (12.0)              | 25.6 (2.9)                               | Parallel        | 2                   | Wheat bran supplements;<br>Oat bran supplements   | Oat bran: 25.0;<br>Wheat bran: 25.0                       |
| Jenkins, 2002, Canada [14]                       | 23                 | 63.0 (4.8)               | 26.7 (5.3)                               | Crossover       | 12                  | Wheat bran cereal and bread                       | Wheat bran: 19.0                                          |
| Johnston, 1998, United States [15]               | 124                | 57.0 (NR)                | NR                                       | Parallel        | 6                   | Ready-to-eat oat cereal                           | Oat: 9.0                                                  |
| Kabir, 2002, Switzerland [16]                    | 13                 | 59.0 (7.2)               | 28.0 (3.6)                               | Crossover       | 4                   | Oat bran concentrated bread;<br>Whole wheat bread | Oat: 8.7;<br>Wheat: 10.0                                  |
| Karmally, 2005, United States [17]               | 152                | 49.0 (10.7)              | 29.2 (3.9)                               | Parallel        | 6                   | Oat bran cereal                                   | Oat bran: NR                                              |
| Kashian, 1991, Canada [18]                       | 84                 | 55.8 (13.0)              | 25.7 (2.9)                               | Parallel        | 2                   | Oat-bran cereals;<br>Wheat-bran cereals           | Oat bran: 25.0;<br>Wheat bran: 24.0                       |
| Kazemzadeh, 2014, Iran [19]                      | 35                 | 32.6 (6.0)               | 29.8 (4.0)                               | Crossover       | 6                   | Brown rice supplements                            | Brown rice: 5.3                                           |
| Kestin, 1990, Australia [20]                     | 24                 | 46.0 (10.0)              | 25.4 (2.0)                               | Crossover       | 4                   | Bread and muffin of oat bran or<br>wheat bran     | Oat bran: 11.8;<br>Wheat bran: 12.5                       |
| Kristensen, 2011, Denmark [21]                   | 12                 | NR                       | 24.9 (2.9)                               | Crossover       | 2                   | Oat bran breads                                   | Oat bran: 10.4                                            |
| Kristensen, 2012, Italy [22]                     | 72                 | 59.7 (5.5)               | 30.2 (3.1)                               | Parallel        | 12                  | Whole wheat bread, pasta, and<br>biscuits         | Wheat: 11.0                                               |
| Lee, 2016, Korea [23]                            | 93                 | 57.9 (7.4)               | 23.5 (3.0)                               | Parallel        | 4                   | Brown rice supplements                            | Brown rice: NR                                            |
| Leinonen, 2000, Finland [24]                     | 39                 | 43.0 (8.0)               | 24.5 (3.0)                               | Crossover       | 4                   | Rye bread                                         | Rye: 19.2                                                 |
| Li, 2003, Japan [25]                             | 10                 | 20.4 (1.3)               | 19.2 (2.0)                               | Crossover       | 4                   | Barley food supplements                           | Barley: 13.9                                              |
| Li, 2015, China [26]                             | 238                | 59.5 (6.1)               | 26.8 (2.5)                               | Parallel        | 4                   | Whole grain oats cereals                          | Oat: 4.4, 8.7                                             |
| Liatis, 2009, Greece [27]                        | 41                 | 63.0 (9.0)               | 28.5 (4.3)                               | Parallel        | 3                   | Oat bread                                         | Oat: >21.1                                                |
| Liebman, 1983, United States [28]                | 20                 | NR                       | NR                                       | Crossover       | 6                   | Wheat bran bread                                  | Wheat bran: 31.0                                          |

**Supplemental Table 1** Continued

| Author, publication year, country<br>(reference) | No. of<br>subjects | Age <sup>b</sup> (years) | BMI <sup>b</sup><br>(kg/m <sup>2</sup> ) | Study<br>design | Duration<br>(weeks) | Intervention products                                                   | Dietary fiber content of<br>intervention products (g/day) |
|--------------------------------------------------|--------------------|--------------------------|------------------------------------------|-----------------|---------------------|-------------------------------------------------------------------------|-----------------------------------------------------------|
| Lovegrove, 1999, United States [29]              | 62                 | 56.6 (9.3)               | 25.9 (3.5)                               | Parallel        | 12                  | Oat bran cereal;<br>Wheat bran cereal<br>Barley cereal;                 | Oat bran: 5.9;<br>Wheat bran: 0.5<br>Barley: 25.3;        |
| McIntosh, 1991, Australia [30]                   | 21                 | 44.2 (7.6)               | 25.6 (2.7)                               | Crossover       | 4                   | Whole wheat cereal                                                      | Wheat: 26.0                                               |
| Moazzami, 2012, Sweden [31]                      | 33                 | 58.8 (5.8)               | 27.2 (3.2)                               | Crossover       | 8                   | Rye bran bread                                                          | Rye bran: 36.9                                            |
| Pick, 1996, Canada [32]                          | 8                  | 46.0 (2.8)               | 27.6 (0.6)                               | Crossover       | 12                  | Oat bran concentrated bread                                             | Oat bran: 18.0                                            |
| Pins, 2002, United States [33]                   | 88                 | 47.6 (16.2)              | 30.9 (4.9)                               | Parallel        | 12                  | Oatmeal and oat squares                                                 | Oat :11.7                                                 |
| Poulter, 1993, United Kingdom [34]               | 58                 | 56.4 (2.5)               | NR                                       | Crossover       | 4                   | Oat bran crispies                                                       | Oat bran: >4.5                                            |
| Robitaille, 2004, Canada [35]                    | 34                 | 38.3 (7.8)               | 29.1 (4.6)                               | Parallel        | 4                   | Oat bran-enriched muffins<br>Oat bran cookies;                          | Oat bran: 6.2<br>Oat bran: 9.6;                           |
| Romero, 1998, Mexico [36]                        | 46                 | 34.1 (9.0)               | 26.9 (3.0)                               | Parallel        | 8                   | Wheat bran cookies<br>Quick oats as hot cereal, bread and<br>casseroles | Wheat bran: 1.9<br>Oat: 8.7                               |
| Saltzman, 2001, United States [37]               | 43                 | 44.6 (22.0)              | 26.4 (3.3)                               | Parallel        | 6                   |                                                                         |                                                           |
| Shimabukuro, 2013, Japan [38]                    | 27                 | NR                       | 26.7 (3.7)                               | Crossover       | 8                   | Brown rice supplements                                                  | Brown rice: NR                                            |
| Stevens, 1985, United States [39]                | 25                 | 54.4 (3.0)               | NR                                       | Parallel        | 6                   | Oat bran muffins                                                        | Oat bran: 13.2                                            |
| Swain, 1990, United States [40]                  | 40                 | 30.0 (NR)                | NR                                       | Crossover       | 6                   | Oat bran supplements                                                    | Oat bran: 28.8                                            |
| Tarpila, 1978, Finland [41]                      | 22                 | 51.4 (9.3)               | NR                                       | Parallel        | 52                  | Wheat bran cereal                                                       | Wheat bran: NR                                            |
| Thongoun, 2013, Thailand [42]                    | 24                 | 51.0 (6.9)               | 26.8 (5.8)                               | Crossover       | 8                   | Oatmeal for breakfast                                                   | Oat: 7.4                                                  |
| Tighe, 2010, United Kingdom [43]                 | 206                | 51.7 (6.6)               | 28.0 (4.2)                               | Parallel        | 12                  | Whole wheat bread and cereals<br>Oat bran concentrate bread;            | Wheat: 18.5<br>Oat bran: NR;                              |
| Torronen, 1992, Finland [44]                     | 28                 | 41.0 (NR)                | NR                                       | Parallel        | 8                   | Whole wheat bread                                                       | Wheat: NR                                                 |

**Supplemental Table 1** Continued

| Author, publication year, country<br>(reference) | No. of<br>subjects | Age <sup>b</sup> (years) | BMI <sup>b</sup><br>(kg/m <sup>2</sup> ) | Study<br>design | Duration<br>(weeks) | Intervention products                           | Dietary fiber content of<br>intervention products (g/day) |
|--------------------------------------------------|--------------------|--------------------------|------------------------------------------|-----------------|---------------------|-------------------------------------------------|-----------------------------------------------------------|
| Uusitupa, 1992, Finland [45]                     | 36                 | 47.8 (7.9)               | 26.5 (3.0)                               | Parallel        | 8                   | Oat bran supplements;<br>Wheat bran supplements | Oat bran: 29.8;<br>Wheat bran: 20.5                       |
| Van Horn, 1988, United States [46]               | 236                | 42.4 (NR)                | NR                                       | Parallel        | 8                   | Oat meal supplements                            | Oat: 5.9                                                  |
| Van Horn, 1991, United States [47]               | 80                 | 42.5 (12.8)              | 26.2 (3.6)                               | Parallel        | 8                   | Oat meal supplements                            | Oat: 5.6                                                  |
| Vitaglione, 2015, Italy [48]                     | 68                 | 38.6 (11.7)              | 29.8 (2.7)                               | Parallel        | 8                   | Whole wheat products                            | Wheat: 8.0                                                |
| Wang, 2013, United States [49]                   | 57                 | 52.5 (9.0)               | 25.7 (2.7)                               | Parallel        | 12                  | Brown rice                                      | Brown rice: NR                                            |
| Wang, 2016, Canada [50]                          | 30                 | 59.0 (2.0)               | 28.5 (1.2)                               | Crossover       | 5                   | Barley cereal                                   | Barley: NR                                                |
| Winblad, 1995, Finland [51]                      | 59                 | 44.0 (6.2)               | 26.7 (3.0)                               | Crossover       | 6                   | Oat bran as rolls, flakes, small<br>cakes       | Oat bran: 15.1                                            |
| Wolever, 2010, Canada [52]                       | 367                | 52.2 (9.1)               | 27.5 (4.2)                               | Parallel        | 4                   | Oat bran cereals;<br>Wheat bran cereals         | Oat bran: 5.6, 6.0, 7.9, 8.1;<br>Wheat bran 5.9           |
| Zhang, 1992, Sweden [53]                         | 9                  | 49.0 (NR)                | NR                                       | Crossover       | 3                   | Oat bran bread                                  | Oat bran: 29.0                                            |
| Zhang, 2011, China [54]                          | 202                | 49.7 (6.9)               | 25.7 (3.1)                               | Parallel        | 16                  | Brown rice supplements                          | Brown rice: 5.6                                           |
| Zhang, 2012, China [55]                          | 166                | 53.2 (6.5)               | 25.5 (3.0)                               | Parallel        | 6                   | Oat meal supplements                            | Oat: 10.6                                                 |

<sup>a</sup>NR, Not report

<sup>b</sup>Age and BMI are provided as mean (SD)

**Supplemental Table 2** Funding sources of the included studies

| Author, publication year, country<br>(reference) | Funding source                                                                                                                                                                                                               |
|--------------------------------------------------|------------------------------------------------------------------------------------------------------------------------------------------------------------------------------------------------------------------------------|
| Beck, 2010, Australia [1]                        | Australian Research Council Linkage between the University of Wollongong and Cereal Partners Worldwide (Grant ID LP0561586)                                                                                                  |
| Berg, 2003, Germany [2]                          | Not report                                                                                                                                                                                                                   |
| Bremer, 1991, New Zealand [3]                    | Not report                                                                                                                                                                                                                   |
| Chang, 2013, Taiwan [4]                          | STANDARD Foods Co.                                                                                                                                                                                                           |
| Charlton, 2012, Australia [5]                    | Cereal Partners Worldwide Ltd.                                                                                                                                                                                               |
| Chen, 2006, United States [6]                    | The Quaker Oats Co.                                                                                                                                                                                                          |
| Davidson, 1991, United States [7]                | Quaker Oats Co.                                                                                                                                                                                                              |
| Davy, 2002, United States [8]                    | Quaker Oats Co.                                                                                                                                                                                                              |
| Gerhardt, 1998, United States [9]                | Pacific Rice Products and Sutter Heart Institute, CA                                                                                                                                                                         |
| Giacco, 2009, Italy [10]                         | R&D Barilla G&R, Italy                                                                                                                                                                                                       |
| Gold, 1988, United States [11]                   | National Heart, Lung, and Blood Institute Preventive Cardiology Academic Award to Dr Davidson (HL-01243)                                                                                                                     |
| Hajifaraji, 2012, Iran [12]                      | National Nutrition and Food Technology Research Institute<br>The grand from National Institutes of Health the Ontario Ministry of Health, and the Natural Sciences and Engineering Research Council of Canada (ROI HL 39689) |
| Jenkins, 1993, Canada [13]                       | University-Industry Research Partnership Program of the Natural Sciences and Engineering Research Council of Canada; Loblaw Brands Limited and Kraft Canada, Don Mills, Ontario, Canada                                      |
| Jenkins, 2002, Canada [14]                       | Brands Limited and Kraft Canada, Don Mills, Ontario, Canada                                                                                                                                                                  |
| Johnston, 1998, United States [15]               | General Mills. Inc<br>The grand from National Institute of Health and Medical Research, Pierre and Marie Curie University, and Nestle Center, Orbe,                                                                          |
| Kabir, 2002, Switzerland [16]                    | Switzerland                                                                                                                                                                                                                  |
| Karmally, 2005, United States [17]               | General Mills. Inc, Minneapolis                                                                                                                                                                                              |
| Kashian, 1991, Canada [18]                       | The grant Ministry of Health of Ontario                                                                                                                                                                                      |
| Kazemzadeh, 2014, Iran [19]                      | The grand from Isfanhan University of Medical Sciences and Food Security Research Center (391213)                                                                                                                            |
| Kristensen, 2011, Denmark [21]                   | The grant of Faculty of Life Sciences, University of Copenhagen                                                                                                                                                              |



**Supplemental Table 2** Continued

| Author, publication year, country<br>(reference) | Funding source                                                                                                                                                                                     |
|--------------------------------------------------|----------------------------------------------------------------------------------------------------------------------------------------------------------------------------------------------------|
| Kristensen, 2012, Italy [22]                     | European Commission in the Communities 6th Framework Programme, Project HEALTHGRAIN (FOOD-CT-2005-514008), and the University of Copenhagen, Faculty of Life Sciences and LMC FOOD research school |
| Lee, 2016, Korea [23]                            | Ministry of Health & Welfare (A111716-1202-0000100), the Korean Health Technology R&D Project, and the Ministry of Health and Welfare, Republic of Korea (HI13C0715 and HI11C1300)                 |
| Leinonen, 2000, Finland [24]                     | Fazer Bakeries Ltd., Vaasan & Vaasan Ltd. and the Technology Development Centre of Finland                                                                                                         |
| Li, 2003, Japan [25]                             | Haku-Baku Company Ltd. (Yamanashi,Japan)                                                                                                                                                           |
| Li, 2015, China [26]                             | Inner Mongolia Sanzhuliang Natural Oats Industry Corporation (IMSNOIC)                                                                                                                             |
| Liatis, 2009, Greece [27]                        | Not report                                                                                                                                                                                         |
| Liebman,1983, United States [28]                 | Not report                                                                                                                                                                                         |
| Lovegrove, 1999, United States [29]              | Nestle.                                                                                                                                                                                            |
| McIntosh, 1991, Australia [30]                   | Barley Research Council of Australia                                                                                                                                                               |
| Moazzami, 2012, Sweden [31]                      | Fazer Bakeries Ltd., Vaasan & Vaasan Oy, the Technology Development Center of Finland                                                                                                              |
| Pick, 1996, Canada [32]                          | Quaker Oats Company of Canada                                                                                                                                                                      |
| Pins, 2002, United States [33]                   | Quaker Oats Company, Barrington, Illinois                                                                                                                                                          |
| Poulter, 1993, United Kingdom [34]               | Quaker Oats, Southall, UK                                                                                                                                                                          |
| Robitaille, 2004, Canada [35]                    | The grant from Réseau de santé cardiovasculaire du Fonds de la recherche en santé du Québec' (RSCVFRSQ)                                                                                            |
| Romero, 1998, Mexico [36]                        | Not report                                                                                                                                                                                         |
| Saltzman, 2001, United States [37]               | Quaker Oats Company, National Institutes of Health Grant (AG12829) and U.S. Department of agriculture contract (53-3K06-5-10)                                                                      |
| Shimabukuro, 2013, Japan [38]                    | The grants of Ministry of Education, Culture, Sports, Science and Technology and the Ministry of Health, Labour and Welfare, Japan                                                                 |
| Stevens,1985, United States [39]                 | The grand from University of Virginia Diabetes Research and Training Center, the University of Virginia School of Medicine Research and Development Committee                                      |

---

**Supplemental Table 2** Continued

| Author, publication year, country<br>(reference) | Funding source                                                                                                                                                                                                                                                 |
|--------------------------------------------------|----------------------------------------------------------------------------------------------------------------------------------------------------------------------------------------------------------------------------------------------------------------|
| Swain, 1990, United States [40]                  | Grand (from the National Heart,Lung and Blood Institute HL34593) and a Clinical Research Center grant (M01-RR02635)                                                                                                                                            |
| Tarpila, 1978, Finland [41]                      | Grants from the Finnish State Council for Medical Research                                                                                                                                                                                                     |
| Thongoun, 2013, Thailand [42]                    | Not report                                                                                                                                                                                                                                                     |
| Tighe, 2010, United Kingdom [43]                 | Grant from the Food Standard Agency (NO2035) and funding from the Scottish Government. Paterson Arran Ltd., Livingston, United Kingdom                                                                                                                         |
| Torrönen, 1992, Finland [44]                     | Grant from the Olvi Foundation, Finland<br>Alko Ltd., Finland, the Medical Council of the Academy of Finland, Sigfrid Juselius Foundation, and by a personal grant to Dr.                                                                                      |
| Uusitupa, 1992, Finland [45]                     | Uusitupa from the Medical Council of Academy of Finland                                                                                                                                                                                                        |
| Van Horn, 1988, United States [46]               | Not report                                                                                                                                                                                                                                                     |
| Van Horn, 1991, United States [47]               | Quaker Oats Company                                                                                                                                                                                                                                            |
| Vitaglione, 2015, Italy [48]                     | General Mills Bell Institute of Health and Nutrition with an unconditional grant                                                                                                                                                                               |
| Wang, 2013, United States [49]                   | Not report                                                                                                                                                                                                                                                     |
| Wang, 2016, Canada [50]                          | Agriculture and Agri-Food Canada (AAFC)s Growing Forward program                                                                                                                                                                                               |
| Winblad, 1995, Finland [51]                      | Melia Ltd.                                                                                                                                                                                                                                                     |
| Wolever, 2010, Canada [52]                       | CreaNutrition, The Swedish Governmental Agency for Innovations Systems, and Agriculture and Agri-Food Canada<br>Swedish Board of Technical Development (STU), the Swedish Council of Forestry and Agricultural Research (SJFR), and                            |
| Zhang, 1992, Sweden [53]                         | Wasabrod AB<br>Chief Scientist Program of Shanghai Institutes for Biological Sciences, Chinese Academy of Sciences (SIBS2008006), Chinese<br>Academy of Sciences (KSCX1-YW-02 and KSCX2-EW-R-10), National Basic Research Program of China (2011CB504002), and |
| Zhang, 2011, China [54]                          | National Natural Science Foundation of China (30930081 and 81021002)                                                                                                                                                                                           |
| Zhang, 2012, China [55]                          | Xin Tan Health Research Development center (20080101) and Pepsi Co china Foods                                                                                                                                                                                 |

---

---

**REFERENCES:**

1. Beck EJ, Tapsell LC, Batterham MJ, Tosh SM, Huang XF (2010) Oat beta-glucan supplementation does not enhance the effectiveness of an energy-restricted diet in overweight women. *The British journal of nutrition* 103:1212-1222. doi 10.1017/s0007114509992856.
2. Berg A, Konig D, Deibert P, Grathwohl D, Berg A, Baumstark MW, Franz IW (2003) Effect of an oat bran enriched diet on the atherogenic lipid profile in patients with an increased coronary heart disease risk. A controlled randomized lifestyle intervention study. *Ann Nutr Metab* 47:306-311. doi 72404.
3. Bremer JM, Scott RS, Lintott CJ (1991) Oat bran and cholesterol reduction: evidence against specific effect. *Aust N Z J Med* 21:422-426.
4. Chang HC, Huang CN, Yeh DM, Wang SJ, Peng CH, Wang CJ (2013) Oat prevents obesity and abdominal fat distribution, and improves liver function in humans. *Plant Foods Hum Nutr* 68:18-23. doi 10.1007/s11130-013-0336-2.
5. Charlton KE, Tapsell LC, Batterham MJ, O'Shea J, Thorne R, Beck E, Tosh SM (2012) Effect of 6 weeks' consumption of beta-glucan-rich oat products on cholesterol levels in mildly hypercholesterolaemic overweight adults. *The British journal of nutrition* 107:1037-1047. doi 10.1017/s0007114511003850.
6. Chen J, He J, Wildman RP, Reynolds K, Streiffer RH, Whelton PK (2006) A randomized controlled trial of dietary fiber intake on serum lipids. *European journal of clinical nutrition* 60:62-68. doi 10.1038/sj.ejcn.1602268.
7. Davidson MH, Dugan LD, Burns JH, Bova J, Story K, Drennan KB (1991) The hypocholesterolemic effects of beta-glucan in oatmeal and oat bran. A dose-controlled study. *Jama* 265:1833-1839.
8. Davy BM, Davy KP, Ho RC, Beske SD, Davrath LR, Melby CL (2002) High-fiber oat cereal compared with wheat cereal consumption favorably alters LDL-cholesterol subclass and particle numbers in middle-aged and older men. *The American journal of clinical nutrition* 76:351-358.
9. Gerhardt AL, Gallo NB (1998) Full-fat rice bran and oat bran similarly reduce hypercholesterolemia in humans. *The Journal of nutrition* 128:865-869.
10. Giacco R, Clemente G, Cipriano D, Luongo D, Viscovo D, Patti L, Di Marino L, Giacco A, Naviglio D, Bianchi MA, Ciati R, Brighenti F, Rivellese AA, Riccardi G (2010) Effects of the regular consumption of wholemeal wheat foods on cardiovascular risk factors in healthy people. *Nutr Metab Cardiovasc Dis* 20:186-194. doi 10.1016/j.numecd.2009.03.025.
11. Gold KV, Davidson DM (1988) Oat bran as a cholesterol-reducing dietary adjunct in a young, healthy population. *The Western journal of medicine* 148:299-302.
12. Hajifaraji M, Najjar Safari S, Rezvani V, Rashidkhani B, Maddah M (2012) Comparison study between the effect of oat and barley breads on serum glucose and lipid profiles in dyslipidemic and type 2 diabetic subjects: A short-term trial. *Mediterranean Journal of Nutrition and Metabolism* 5:247-252. doi 10.1007/s12349-012-0092-0.
13. Jenkins DJ, Hegele RA, Jenkins AL, Connelly PW, Hallak K, Bracci P, Kashtan H, Corey P, Pintilia M, Stern H, et al. (1993) The apolipoprotein E gene and the serum low-density lipoprotein cholesterol response to dietary fiber. *Metabolism* 42:585-593.
14. Jenkins DJ, Kendall CW, Augustin LS, Martini MC, Axelsen M, Faulkner D, Vidgen E, Parker T, Lau H, Connelly PW, Teitel J, Singer W, Vandenbroucke AC, Leiter LA, Josse RG (2002) Effect of wheat bran on glycemic control and risk factors for cardiovascular disease in type 2 diabetes.

- 
- Diabetes care 25:1522-1528.
15. Johnston L, Reynolds HB, Hunninghake DB, Schultz K, Westereng B (1998) Cholesterol-lowering benefits of a whole grain oat ready to eat cereal. In: *Nutrition Clinical Care*. p 6-12
  16. Kabir M, Oppert JM, Vidal H, Bruzzo F, Fiquet C, Wursch P, Slama G, Rizkalla SW (2002) Four-week low-glycemic index breakfast with a modest amount of soluble fibers in type 2 diabetic men. *Metabolism* 51:819-826.
  17. Karmally W, Montez MG, Palmas W, Martinez W, Branstetter A, Ramakrishnan R, Holleran SF, Haffner SM, Ginsberg HN (2005) Cholesterol-lowering benefits of oat-containing cereal in Hispanic americans. *J Am Diet Assoc* 105:967-970. doi 10.1016/j.jada.2005.03.006.
  18. Kashtan H, Stern HS, Jenkins DJ, Jenkins AL, Hay K, Marcon N, Minkin S, Bruce WR (1992) Wheat-bran and oat-bran supplements' effects on blood lipids and lipoproteins. *The American journal of clinical nutrition* 55:976-980.
  19. Kazemzadeh M, Safavi SM, Nematollahi S, Nourieh Z (2014) Effect of Brown Rice Consumption on Inflammatory Marker and Cardiovascular Risk Factors among Overweight and Obese Non-menopausal Female Adults. *Int J Prev Med* 5:478-488.
  20. Kestin M, Moss R, Clifton PM, Nestel PJ (1990) Comparative effects of three cereal brans on plasma lipids, blood pressure, and glucose metabolism in mildly hypercholesterolemic men. *The American journal of clinical nutrition* 52:661-666.
  21. Kristensen M, Bugel S (2011) A diet rich in oat bran improves blood lipids and hemostatic factors, and reduces apparent energy digestibility in young healthy volunteers. *European journal of clinical nutrition* 65:1053-1058. doi 10.1038/ejcn.2011.102.
  22. Kristensen M, Toubro S, Jensen MG, Ross AB, Riboldi G, Petronio M, Bugel S, Tetens I, Astrup A (2012) Whole grain compared with refined wheat decreases the percentage of body fat following a 12-week, energy-restricted dietary intervention in postmenopausal women. *The Journal of nutrition* 142:710-716. doi 10.3945/jn.111.142315.
  23. Lee YM, Kim SA, Lee IK, Kim JG, Park KG, Jeong JY, Jeon JH, Shin JY, Lee DH (2016) Effect of a Brown Rice Based Vegan Diet and Conventional Diabetic Diet on Glycemic Control of Patients with Type 2 Diabetes: A 12-Week Randomized Clinical Trial. *PloS one* 11:e0155918. doi 10.1371/journal.pone.0155918.
  24. Leinonen KS, Poutanen KS, Mykkanen HM (2000) Rye bread decreases serum total and LDL cholesterol in men with moderately elevated serum cholesterol. *The Journal of nutrition* 130:164-170.
  25. Li J, Kaneko T, Qin LQ, Wang J, Wang Y (2003) Effects of barley intake on glucose tolerance, lipid metabolism, and bowel function in women. *Nutrition (Burbank, Los Angeles County, Calif.)* 19:926-929.
  26. Li X, Cai X, Ma X, Jing L, Gu J, Bao L, Li J, Xu M, Zhang Z, Li Y (2016) Short- and Long-Term Effects of Wholegrain Oat Intake on Weight Management and Glucolipid Metabolism in Overweight Type-2 Diabetics: A Randomized Control Trial. *Nutrients* 8. doi 10.3390/nu8090549.
  27. Liatis S, Tsapogas P, Chala E, Dimosthenopoulos C, Kyriakopoulos K, Kapantais E, Katsilambros N (2009) The consumption of bread enriched with betaglucan reduces LDL-cholesterol and improves insulin resistance in patients with type 2 diabetes. *Diabetes Metab* 35:115-120. doi 10.1016/j.diabet.2008.09.004.
  28. Liebman M, Smith MC, Iverson J, Thye FW, Hinkle DE, Herbert WG, Ritchey SJ, Driskell JA

- 
- (1983) Effect of coarse wheat bran fiber and exercise on plasma lipids and lipoproteins in moderately overweight men. *The American journal of clinical nutrition* 37:71-81.
29. Lovegrove JA, Clohessy A, Milon H, Williams CM (2000) Modest doses of beta-glucan do not reduce concentrations of potentially atherogenic lipoproteins. *The American journal of clinical nutrition* 72:49-55.
  30. McIntosh GH, Whyte J, McArthur R, Nestel PJ (1991) Barley and wheat foods: influence on plasma cholesterol concentrations in hypercholesterolemic men. *The American journal of clinical nutrition* 53:1205-1209.
  31. Moazzami AA, Bondia-Pons I, Hanhineva K, Juntunen K, Antl N, Poutanen K, Mykkanen H (2012) Metabolomics reveals the metabolic shifts following an intervention with rye bread in postmenopausal women--a randomized control trial. *Nutrition journal* 11:88. doi 10.1186/1475-2891-11-88.
  32. Pick ME, Hawrysh ZJ, Gee MI, Toth E, Garg ML, Hardin RT (1996) Oat bran concentrate bread products improve long-term control of diabetes: a pilot study. *J Am Diet Assoc* 96:1254-1261. doi 10.1016/s0002-8223(96)00329-x.
  33. Pins JJ, Geleva D, Keenan JM, Frazel C, O'Connor PJ, Cherney LM (2002) Do whole-grain oat cereals reduce the need for antihypertensive medications and improve blood pressure control? *The Journal of family practice* 51:353-359.
  34. Poulter N, Chang CL, Cuff A, Poulter C, Sever P, Thom S (1994) Lipid profiles after the daily consumption of an oat-based cereal: a controlled crossover trial. *The American journal of clinical nutrition* 59:66-69.
  35. Robitaille J, Fontaine-Bisson B, Couture P, Tchernof A, Vohl MC (2005) Effect of an oat bran-rich supplement on the metabolic profile of overweight premenopausal women. *Ann Nutr Metab* 49:141-148. doi 10.1159/000086149.
  36. Romero AL, Romero JE, Galaviz S, Fernandez ML (1998) Cookies enriched with psyllium or oat bran lower plasma LDL cholesterol in normal and hypercholesterolemic men from Northern Mexico. *Journal of the American College of Nutrition* 17:601-608.
  37. Saltzman E, Das SK, Lichtenstein AH, Dallal GE, Corrales A, Schaefer EJ, Greenberg AS, Roberts SB (2001) An oat-containing hypocaloric diet reduces systolic blood pressure and improves lipid profile beyond effects of weight loss in men and women. *The Journal of nutrition* 131:1465-1470.
  38. Shimabukuro M, Higa M, Kinjo R, Yamakawa K, Tanaka H, Kozuka C, Yabiku K, Taira S, Sata M, Masuzaki H (2014) Effects of the brown rice diet on visceral obesity and endothelial function: the BRAVO study. *The British journal of nutrition* 111:310-320. doi 10.1017/s0007114513002432.
  39. Stevens J, Burgess MB, Kaiser DL, Sheppa CM (1985) Outpatient management of diabetes mellitus with patient education to increase dietary carbohydrate and fiber. *Diabetes care* 8:359-366.
  40. Swain JF, Rouse IL, Curley CB, Sacks FM (1990) Comparison of the effects of oat bran and low-fiber wheat on serum lipoprotein levels and blood pressure. *The New England journal of medicine* 322:147-152. doi 10.1056/nejm199001183220302.
  41. Tarpila S, Miettinen TA, Metsaranta L (1978) Effects of bran on serum cholesterol, faecal mass, fat, bile acids and neutral sterols, and biliary lipids in patients with diverticular disease of the colon. *Gut* 19:137-145.

- 
42. Thongoun P, Pavadhgul P, Bumrungpert A, Satitvipawee P, Harjani Y, Kurilich A (2013) Effect of oat consumption on lipid profiles in hypercholesterolemic adults. *Journal of the Medical Association of Thailand = Chotmaihet thangphaet* 96 Suppl 5:S25-32.
  43. Tighe P, Duthie G, Vaughan N, Brittenden J, Simpson WG, Duthie S, Mutch W, Wahle K, Horgan G, Thies F (2010) Effect of increased consumption of whole-grain foods on blood pressure and other cardiovascular risk markers in healthy middle-aged persons: a randomized controlled trial. *The American journal of clinical nutrition* 92:733-740. doi 10.3945/ajcn.2010.29417.
  44. Torronen R, Kansanen L, Uusitupa M, Hanninen O, Myllymaki O, Harkonen H, Malkki Y (1992) Effects of an oat bran concentrate on serum lipids in free-living men with mild to moderate hypercholesterolaemia. *European journal of clinical nutrition* 46:621-627.
  45. Uusitupa MI, Ruuskanen E, Makinen E, Laitinen J, Toskala E, Kervinen K, Kesaniemi YA (1992) A controlled study on the effect of beta-glucan-rich oat bran on serum lipids in hypercholesterolemic subjects: relation to apolipoprotein E phenotype. *Journal of the American College of Nutrition* 11:651-659.
  46. Van Horn L, Emidy LA, Liu KA, Liao YL, Ballew C, King J, Stamler J (1988) Serum lipid response to a fat-modified, oatmeal-enhanced diet. *Prev Med* 17:377-386.
  47. Van Horn L, Moag-Stahlberg A, Liu KA, Ballew C, Ruth K, Hughes R, Stamler J (1991) Effects on serum lipids of adding instant oats to usual American diets. *Am J Public Health* 81:183-188.
  48. Vitaglione P, Mennella I, Ferracane R, Rivellese AA, Giacco R, Ercolini D, Gibbons SM, La Storia A, Gilbert JA, Jonnalagadda S, Thielecke F, Gallo MA, Scalfi L, Fogliano V (2015) Whole-grain wheat consumption reduces inflammation in a randomized controlled trial on overweight and obese subjects with unhealthy dietary and lifestyle behaviors: role of polyphenols bound to cereal dietary fiber. *The American journal of clinical nutrition* 101:251-261. doi 10.3945/ajcn.114.088120.
  49. Wang B, Medapalli R, Xu J, Cai W, Chen X, He JC, Uribarri J (2013) Effects of a whole rice diet on metabolic parameters and inflammatory markers in prediabetes. *e-SPEN Journal* 8:e15-e20.
  50. Wang Y, Harding SV, Eck P, Thandapilly SJ, Gamel TH, Abdel-Aal el SM, Crow GH, Tosh SM, Jones PJ, Ames NP (2016) High-Molecular-Weight beta-Glucan Decreases Serum Cholesterol Differentially Based on the CYP7A1 rs3808607 Polymorphism in Mildly Hypercholesterolemic Adults. *The Journal of nutrition* 146:720-727. doi 10.3945/jn.115.223206.
  51. Winblad I, Joensuu T, Korpela H (1995) Effect of oat bran supplemented diet on hypercholesterolaemia. *Scand J Prim Health Care* 13:118-121.
  52. Wolever TM, Tosh SM, Gibbs AL, Brand-Miller J, Duncan AM, Hart V, Lamarche B, Thomson BA, Duss R, Wood PJ (2010) Physicochemical properties of oat beta-glucan influence its ability to reduce serum LDL cholesterol in humans: a randomized clinical trial. *The American journal of clinical nutrition* 92:723-732. doi 10.3945/ajcn.2010.29174.
  53. Zhang JX, Hallmans G, Andersson H, Bosaeus I, Aman P, Tidehag P, Stenling R, Lundin E, Dahlgren S (1992) Effect of oat bran on plasma cholesterol and bile acid excretion in nine subjects with ileostomies. *The American journal of clinical nutrition* 56:99-105.
  54. Zhang G, Pan A, Zong G, Yu Z, Wu H, Chen X, Tang L, Feng Y, Zhou H, Chen X, Li H, Hong B, Malik VS, Willett WC, Spiegelman D, Hu FB, Lin X (2011) Substituting white rice with brown rice for 16 weeks does not substantially affect metabolic risk factors in middle-aged Chinese men and women with diabetes or a high risk for diabetes. *The Journal of nutrition* 141:1685-1690. doi

---

10.3945/jn.111.142224.

55. Zhang J, Li L, Song P, Wang C, Man Q, Meng L, Cai J, Kurilich A (2012) Randomized controlled trial of oatmeal consumption versus noodle consumption on blood lipids of urban Chinese adults with hypercholesterolemia. *Nutrition journal* 11:54. doi 10.1186/1475-2891-11-54.

**Supplemental Fig. 1** Risk of bias graph. Judgements of review authors (Low, Unclear and High) for each risk of bias item according to the Cochrane Risk of Bias assessment tool. In this tool, studies were deemed to be at high, low or unclear risk of bias based on adequacy of random sequence generation, allocation concealment, blinding of participants and personnel, blinding, incomplete outcome data, selective reporting, and other bias

|                      | Random sequence generation (selection bias) | Allocation concealment (selection bias) | Blinding of participants and personnel (performance bias) | Blinding (performance bias and detection bias) | Incomplete outcome data (attrition bias) | Selective reporting (reporting bias) | Other bias |
|----------------------|---------------------------------------------|-----------------------------------------|-----------------------------------------------------------|------------------------------------------------|------------------------------------------|--------------------------------------|------------|
| Beck,2010            | +                                           | +                                       | +                                                         | +                                              | +                                        | +                                    | +          |
| Berg,2003            | ?                                           | +                                       | +                                                         | +                                              | +                                        | +                                    | +          |
| Bremer,1991          | ?                                           | +                                       | +                                                         | +                                              | +                                        | +                                    | +          |
| Chang,2013           | ?                                           | +                                       | +                                                         | +                                              | +                                        | +                                    | +          |
| Charlton, 2012       | +                                           | +                                       | +                                                         | +                                              | +                                        | +                                    | +          |
| Chen,2006            | ?                                           | +                                       | ?                                                         | ?                                              | +                                        | +                                    | +          |
| Davidson,1991        | ?                                           | +                                       | +                                                         | +                                              | +                                        | +                                    | +          |
| Daw,2002             | ?                                           | ?                                       | ?                                                         | ?                                              | +                                        | +                                    | +          |
| Gerhardt,1998        | ?                                           | +                                       | +                                                         | +                                              | +                                        | +                                    | +          |
| Giacco,2009          | ?                                           | +                                       | ?                                                         | ?                                              | +                                        | +                                    | ?          |
| Gold,1988            | ?                                           | +                                       | +                                                         | +                                              | +                                        | +                                    | +          |
| Hajifaraji + Sh,2012 | ?                                           | +                                       | +                                                         | +                                              | +                                        | +                                    | +          |
| Jenkins,1993         | ?                                           | ?                                       | ?                                                         | ?                                              | +                                        | +                                    | +          |
| Jenkins,2002         | ?                                           | +                                       | ?                                                         | ?                                              | +                                        | +                                    | +          |
| Johnston,1998        | ?                                           | +                                       | +                                                         | ?                                              | +                                        | +                                    | +          |
| Kabir, 2002          | ?                                           | ?                                       | +                                                         | ?                                              | +                                        | +                                    | +          |
| Karmally,2005        | ?                                           | +                                       | +                                                         | +                                              | +                                        | +                                    | +          |
| Kashian,1991         | ?                                           | +                                       | ?                                                         | ?                                              | +                                        | +                                    | +          |
| Kazemzadeh,2014      | ?                                           | +                                       | +                                                         | ?                                              | +                                        | +                                    | ?          |
| Kestin,1990          | ?                                           | +                                       | +                                                         | +                                              | +                                        | +                                    | +          |
| Kristensen,2011      | ?                                           | +                                       | +                                                         | +                                              | +                                        | +                                    | +          |
| Kristensen,2012      | ?                                           | +                                       | +                                                         | +                                              | +                                        | +                                    | +          |
| Lee, 2016            | ?                                           | ?                                       | ?                                                         | ?                                              | +                                        | +                                    | +          |
| Leinonen,2000        | ?                                           | +                                       | ?                                                         | ?                                              | +                                        | +                                    | +          |
| Li,2003              | ?                                           | +                                       | +                                                         | ?                                              | +                                        | +                                    | +          |
| Li,2015              | +                                           | +                                       | ?                                                         | ?                                              | +                                        | +                                    | +          |
| Liatis,2009          | +                                           | +                                       | +                                                         | +                                              | +                                        | +                                    | +          |
| Liebman, 1983        | ?                                           | +                                       | +                                                         | ?                                              | ?                                        | ?                                    | ?          |
| Lovegrove,1999       | +                                           | +                                       | +                                                         | +                                              | +                                        | +                                    | +          |
| McIntosh,1991        | ?                                           | +                                       | ?                                                         | ?                                              | +                                        | +                                    | +          |
| Moazzami,2012        | ?                                           | +                                       | ?                                                         | ?                                              | +                                        | +                                    | +          |
| Pick, 1996           | ?                                           | +                                       | ?                                                         | ?                                              | +                                        | +                                    | +          |
| Pins,2002            | ?                                           | +                                       | ?                                                         | ?                                              | +                                        | +                                    | +          |
| Poulter,1993         | ?                                           | +                                       | ?                                                         | ?                                              | +                                        | +                                    | +          |
| Robitaille,2004      | ?                                           | +                                       | ?                                                         | ?                                              | +                                        | +                                    | +          |
| Romero,1998          | ?                                           | +                                       | ?                                                         | ?                                              | +                                        | +                                    | +          |
| Saltzman,2001        | +                                           | +                                       | ?                                                         | ?                                              | +                                        | +                                    | ?          |
| Shimabukuro,2013     | +                                           | +                                       | ?                                                         | ?                                              | +                                        | +                                    | +          |
| Steven,1985          | ?                                           | +                                       | +                                                         | +                                              | ?                                        | +                                    | +          |
| Swain,1990           | ?                                           | +                                       | +                                                         | +                                              | +                                        | +                                    | +          |
| Tarpila,1978         | ?                                           | ?                                       | ?                                                         | ?                                              | +                                        | +                                    | ?          |
| Thongoun,2013        | ?                                           | ?                                       | ?                                                         | ?                                              | +                                        | +                                    | +          |
| Tighe,2010           | ?                                           | +                                       | +                                                         | +                                              | +                                        | +                                    | +          |
| Torronen,1992        | ?                                           | +                                       | +                                                         | +                                              | +                                        | +                                    | +          |
| Uusitupa,1992        | ?                                           | +                                       | +                                                         | +                                              | +                                        | +                                    | +          |
| Van Horn,1991        | ?                                           | +                                       | +                                                         | ?                                              | +                                        | +                                    | +          |
| Van Horn,1998        | ?                                           | +                                       | +                                                         | ?                                              | +                                        | +                                    | +          |
| Vitaglione,2015      | +                                           | +                                       | ?                                                         | ?                                              | +                                        | +                                    | +          |
| Wang,2013            | ?                                           | +                                       | ?                                                         | ?                                              | +                                        | +                                    | +          |
| Wang,2016            | +                                           | +                                       | +                                                         | +                                              | +                                        | +                                    | +          |
| Winblad,1995         | +                                           | ?                                       | ?                                                         | ?                                              | +                                        | +                                    | ?          |
| Wolever,2010         | +                                           | +                                       | +                                                         | +                                              | +                                        | +                                    | +          |
| Zhang,1992           | ?                                           | ?                                       | ?                                                         | ?                                              | +                                        | +                                    | +          |
| Zhang,2011           | +                                           | ?                                       | ?                                                         | ?                                              | +                                        | +                                    | +          |
| Zhang,2012           | ?                                           | +                                       | +                                                         | ?                                              | +                                        | +                                    | +          |



**Supplemental Fig. 2** Summary of Cochrane risk of bias results. Judgements of review authors (Low, Unclear and High) for each risk of bias item shown as percentages across all included studies

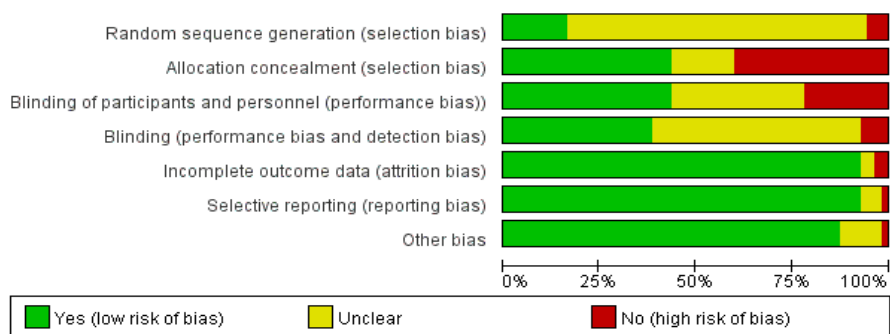

**Supplemental Fig. 3** Pairwise meta-analysis of total cholesterol. The square represents the overall estimated effects, and the results were obtained from a random-effects model. MD lower than 0 indicate that the former treatment is more efficacious than latter. MD, mean differences

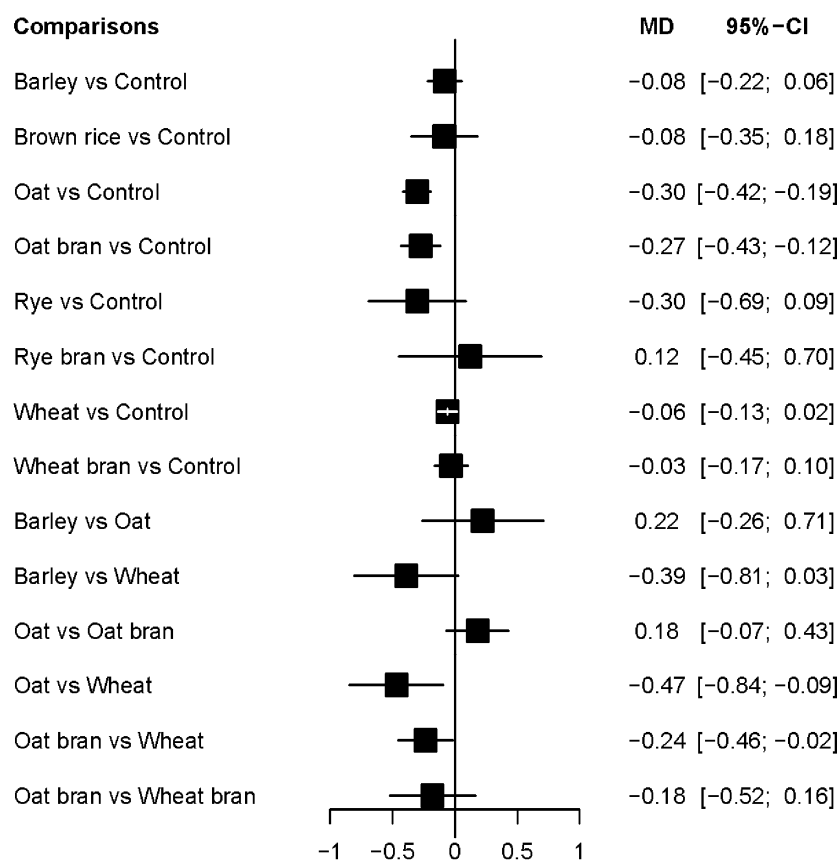

**Supplemental Table 3** Pairwise meta-analysis results for total cholesterol

| Comparisons            | No. of comparisons | Mean differences      |                       |          |                       |                                      |
|------------------------|--------------------|-----------------------|-----------------------|----------|-----------------------|--------------------------------------|
|                        |                    | (95% CI) <sup>a</sup> | <i>I</i> <sup>2</sup> | $\tau^2$ | <i>P</i> <sup>b</sup> | <i>P</i> <sup>c</sup> (Egger's test) |
| Barley vs Control      | 5                  | -0.08 (-0.22, 0.06)   | 0%                    | 0.00     | 0.59                  | 0.11                                 |
| Brown rice vs Control  | 5                  | -0.08 (-0.35, 0.18)   | 45.7%                 | 0.04     | 0.12                  | 0.02                                 |
| Oat vs Control         | 27                 | -0.30 (-0.42, -0.19)  | 77.6%                 | 0.05     | <0.01                 | 0.05                                 |
| Oat bran vs Control    | 22                 | -0.29 (-0.43, -0.12)  | 55.8%                 | 0.08     | 0.01                  | 0.38                                 |
| Rye vs Control         | 2                  | -0.30 (-0.69, 0.09)   | 0%                    | 0.00     | 0.59                  | -                                    |
| Rye bran vs Control    | 1                  | 0.12 (-0.45, 0.70)    | -                     | -        | -                     | -                                    |
| Wheat vs Control       | 6                  | -0.06 (-0.13, 0.02)   | 58.9%                 | 0.00     | 0.03                  | 0.14                                 |
| Wheat bran vs Control  | 5                  | -0.03 (-0.17, 0.10)   | 0%                    | 0.00     | 0.96                  | 0.21                                 |
| Barley vs Oat          | 2                  | 0.22 (-0.26, 0.71)    | 0%                    | 0.00     | 0.73                  | -                                    |
| Barley vs Wheat        | 1                  | -0.39 (-0.81, 0.03)   | -                     | -        | -                     | -                                    |
| Oat vs Oat bran        | 9                  | 0.18 (-0.07, 0.43)    | 48.4%                 | 0.08     | 0.06                  | 0.42                                 |
| Oat vs Wheat           | 2                  | -0.47 (-0.84, -0.09)  | 0%                    | 0.00     | 0.82                  | -                                    |
| Oat bran vs Wheat      | 4                  | -0.24 (-0.46, -0.02)  | 0%                    | 0.00     | 0.81                  | -                                    |
| Oat bran vs Wheat bran | 10                 | -0.18 (-0.52, 0.16)   | 91.4%                 | 0.25     | <0.01                 | <0.01                                |

<sup>a</sup>Mean differences lower than 0 indicate that the former treatment is more efficacious than latter

<sup>b</sup>*P* for the heterogeneity of pairwise meta-analysis. Heterogeneity was assessed by using Cochran's test, and *P* < 0.05 was considered to indicate significant heterogeneity across studies

<sup>c</sup>*P* for Egger's test. *P* < 0.05 was considered to indicate a significant small-study effects

**Supplemental Table 4** Contribution of direct evidence to the network for total cholesterol

| Comparisons            | No. of comparisons | Contribution to the network (%) |
|------------------------|--------------------|---------------------------------|
| Control vs Barley      | 5                  | 13.4                            |
| Control vs Brown rice  | 5                  | 15.3                            |
| Control vs Oat         | 27                 | 13.4                            |
| Control vs Oat bran    | 22                 | 8.9                             |
| Control vs Wheat       | 6                  | 15.9                            |
| Control vs Wheat bran  | 5                  | 14.4                            |
| Barley vs Oat          | 2                  | 1.7                             |
| Barley vs Wheat        | 1                  | 1.8                             |
| Oat vs Oat bran        | 9                  | 4.9                             |
| Oat vs Wheat           | 2                  | 1.6                             |
| Oat bran vs Wheat      | 4                  | 5.2                             |
| Oat bran vs Wheat bran | 10                 | 3.5                             |

**Supplemental Fig. 4** Evaluation of inconsistency by using loop-specific approach for total cholesterol. IFs are calculated as the absolute difference between direct and indirect estimates and therefore confidence intervals are truncated to 0. Loops that their lower CI limit does not reach the 0 line are considered to present statistically significant inconsistency. IF, inconsistency factor

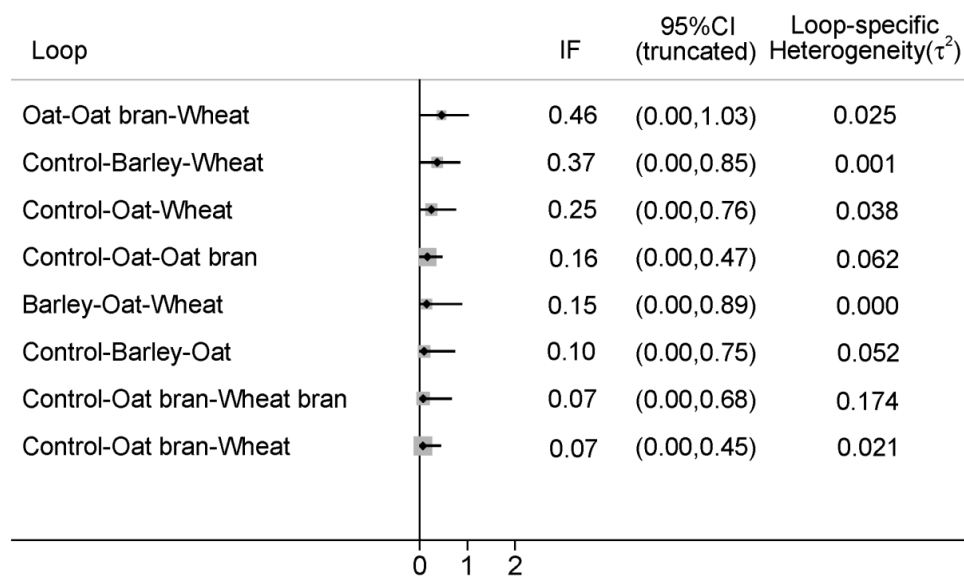

**Supplemental Table 5** Node-splitting method for assessment of inconsistency for total cholesterol

| Comparisons            | Direct      |           | Indirect    |           | Difference  |           | $P^a$ | tau       |
|------------------------|-------------|-----------|-------------|-----------|-------------|-----------|-------|-----------|
|                        | Coefficient | SE        | Coefficient | SE        | Coefficient | SE        |       |           |
| Control vs Barley      | -0.1221095  | 0.1317494 | -0.2086694  | 0.2250723 | 0.0865598   | 0.260961  | 0.74  | 0.2307815 |
| Control vs Brown rice  | -           | -         | -           | -         | -           | -         | -     | -         |
| Control vs Oat         | -0.2604815  | 0.0573244 | -0.2490505  | 0.1658578 | -0.011431   | 0.17676   | 0.95  | 0.2313763 |
| Control vs Oat bran    | -0.3529375  | 0.0732203 | -0.3488937  | 0.1200637 | -0.0040438  | 0.142009  | 0.98  | 0.2317695 |
| Control vs Wheat       | -0.0446401  | 0.1160423 | 0.0372778   | 0.1393003 | -0.0819179  | 0.1813077 | 0.65  | 0.2315616 |
| Control vs Wheat bran  | -0.0663888  | 0.1562917 | -0.1078544  | 0.1198239 | 0.0414656   | 0.1966237 | 0.83  | 0.2324312 |
| Barley vs Oat          | -0.2357118  | 0.3027424 | -0.0915733  | 0.1334965 | -0.1441385  | 0.3309169 | 0.66  | 0.2311404 |
| Barley vs Wheat        | 0.3899994   | 0.3141062 | 0.0734032   | 0.1512108 | 0.3165962   | 0.3486079 | 0.36  | 0.2298051 |
| Oat vs Oat bran        | -0.2272053  | 0.1182553 | -0.006594   | 0.0947947 | -0.2206114  | 0.1515735 | 0.15  | 0.2298353 |
| Oat vs Wheat           | 0.4685686   | 0.2516291 | 0.2081646   | 0.1071464 | 0.260404    | 0.2734927 | 0.34  | 0.2301584 |
| Oat bran vs Wheat      | 0.230957    | 0.1754793 | 0.3911623   | 0.1188773 | -0.1602053  | 0.2119582 | 0.45  | 0.2307415 |
| Oat bran vs Wheat bran | 0.2485845   | 0.1002491 | 0.2900568   | 0.1695744 | -0.0414722  | 0.1966236 | 0.83  | 0.2324312 |

<sup>a</sup> $P$  for assessment of inconsistency.  $P < 0.05$  was considered to indicate a significant inconsistency existed between direct and indirect evidence

**Supplemental Table 6** Comparative effects of different whole grains and brans on the control of total cholesterol<sup>a</sup>

|            | Control | Wheat bran         | Wheat              | Oat bran            | Oat                 | Brown rice         | Barley             |
|------------|---------|--------------------|--------------------|---------------------|---------------------|--------------------|--------------------|
| Control    | -       | -0.09 (-0.28,0.09) | -0.01 (-0.19,0.16) | -0.35 (-0.47,-0.23) | -0.26 (-0.36,-0.15) | -0.09 (-0.37,0.19) | -0.14 (-0.37,0.08) |
| Wheat bran |         | -                  | 0.08 (-0.16,0.32)  | -0.26 (-0.43,-0.09) | -0.17 (-0.37,0.04)  | 0.01 (-0.33,0.34)  | -0.05 (-0.34,0.23) |
| Wheat      |         |                    | -                  | -0.34 (-0.53,-0.15) | -0.25 (-0.44,-0.06) | -0.08 (-0.40,0.25) | -0.13 (-0.40,0.13) |
| Oat bran   |         |                    |                    | -                   | 0.09 (-0.05,0.24)   | 0.27 (-0.04,0.57)  | 0.21 (-0.04,0.46)  |
| Oat        |         |                    |                    |                     | -                   | 0.17 (-0.13,0.47)  | 0.12 (-0.12,0.35)  |
| Brown rice |         |                    |                    |                     |                     | -                  | -0.06 (-0.41,0.30) |
| Barley     |         |                    |                    |                     |                     |                    | -                  |

<sup>a</sup>Mean differences with 95% confidence intervals (column vs row). Mean differences lower than 0 indicate that the treatments specified in the row is more efficacious than those in the column

---

**Supplemental Table 7** Detailed ranking results of the comparative effects of different whole grains and brans on the control of total cholesterol: The larger the SUCRA value, the better the treatment. SUCRA, surface under the cumulative ranking curve

| Treatments | SUCRA (%) | MeanRank |
|------------|-----------|----------|
| Control    | 16.6      | 6.0      |
| Barley     | 53.3      | 3.8      |
| Brown rice | 40.6      | 4.6      |
| Oat        | 79.3      | 2.2      |
| Oat bran   | 96.6      | 1.2      |
| Wheat      | 21.6      | 5.7      |
| Wheat bran | 41.9      | 4.5      |



**Supplemental Table 8** Sensitivity analysis using an inconsistency model for total cholesterol<sup>a</sup>

|            | Control | Wheat bran        | Wheat               | Oat bran            | Oat                | Brown rice         | Barley             |
|------------|---------|-------------------|---------------------|---------------------|--------------------|--------------------|--------------------|
| Control    | 19.2    | 0.13 (-0.18,0.45) | -0.28 (-0.40,-0.15) | -0.08 (-0.75,0.58)  | 0.06 (-0.22,0.35)  | -0.09 (-0.37,0.20) | -0.12 (-0.39,0.14) |
| Wheat bran |         | 36.8              | 0.02 (-0.37,0.41)   | -0.37 (-0.78,0.03)  | -0.21 (-0.55,0.13) | -0.02 (-0.44,0.40) | -0.06 (-0.46,0.35) |
| Wheat      |         |                   | 31.2                | -0.39 (-0.74,-0.05) | -0.23 (-0.50,0.03) | -0.04 (-0.41,0.32) | -0.08 (-0.43,0.27) |
| Oat bran   |         |                   |                     | 95.8                | 0.16 (-0.12,0.45)  | 0.35 (-0.03,0.74)  | 0.32 (-0.05,0.68)  |
| Oat        |         |                   |                     |                     | 78.1               | 0.19 (-0.12,0.50)  | 0.15 (-0.14,0.45)  |
| Brown rice |         |                   |                     |                     |                    | 40.8               | -0.04 (-0.42,0.35) |
| Barley     |         |                   |                     |                     |                    |                    | 48.1               |

<sup>a</sup>Mean differences with 95% confidence intervals (row vs column). Mean differences lower than 0 indicate that the treatments specified in the row are more efficacious than those in the column. SUCRA values are given in the diagonal of parenthesis. The larger the SUCRA value, the better the treatment. SUCRA, surface under the cumulative ranking curve

**Supplemental Table 9** Sensitivity analysis based on the studies only included dyslipidemic participants for total cholesterol<sup>a</sup>

|            | Control | Wheat bran         | Wheat             | Oat bran            | Oat                 | Brown rice         | Barley             |
|------------|---------|--------------------|-------------------|---------------------|---------------------|--------------------|--------------------|
| Control    | 20.9    | -0.17 (-0.43,0.09) | 0.02 (-0.22,0.26) | -0.40 (-0.56,-0.25) | -0.27 (-0.40,-0.15) | -0.08 (-0.46,0.30) | -0.09 (-0.37,0.18) |
| Wheat bran |         | 55.5               | 0.19 (-0.14,0.52) | -0.23 (-0.44,-0.02) | -0.10 (-0.37,0.17)  | 0.09 (-0.37,0.55)  | 0.08 (-0.29,0.45)  |
| Wheat      |         |                    | 19.5              | -0.42 (-0.68,-0.16) | -0.29 (-0.54,-0.04) | -0.10 (-0.54,0.35) | -0.11 (-0.44,0.22) |
| Oat bran   |         |                    |                   | 97.1                | 0.13 (-0.04,0.30)   | 0.33 (-0.08,0.73)  | 0.31 (0.01,0.62)   |
| Oat        |         |                    |                   |                     | 76.3                | 0.20 (-0.20,0.60)  | 0.18 (-0.11,0.47)  |
| Brown rice |         |                    |                   |                     |                     | 39.6               | -0.01 (-0.48,0.45) |
| Barley     |         |                    |                   |                     |                     |                    | 41.2               |

<sup>a</sup>Mean differences with 95% confidence intervals (row vs column). Mean differences lower than 0 indicate that the treatments specified in the row are more efficacious than those in the column. SUCRA values are given in the diagonal of parenthesis. The larger the SUCRA value, the better the treatment. SUCRA, surface under the cumulative ranking curve

**Supplemental Table 10** Sensitivity analysis based on the studies with parallel design for total cholesterol<sup>a</sup>

|            | Control | Wheat bran         | Wheat              | Oat bran            | Oat                 | Brown rice        | Barley             |
|------------|---------|--------------------|--------------------|---------------------|---------------------|-------------------|--------------------|
| Control    | 31.6    | -0.08 (-0.34,0.18) | -0.05 (-0.25,0.15) | -0.39 (-0.54,-0.24) | -0.25 (-0.36,-0.14) | 0.30 (-0.27,0.87) | -0.01 (-0.63,0.60) |
| Wheat bran |         | 47.9               | 0.03 (-0.27,0.33)  | -0.31 (-0.52,-0.10) | -0.17 (-0.44,0.10)  | 0.38 (-0.25,1.01) | 0.07 (-0.59,0.73)  |
| Wheat      |         |                    | 43.2               | -0.34 (-0.56,-0.12) | -0.20 (-0.42,0.02)  | 0.35 (-0.25,0.96) | 0.04 (-0.60,0.68)  |
| Oat bran   |         |                    |                    | 96.8                | 0.14 (-0.03,0.31)   | 0.69 (0.10,1.28)  | 0.37 (-0.25,1.00)  |
| Oat        |         |                    |                    |                     | 77.9                | 0.55 (-0.03,1.13) | 0.24 (-0.37,0.84)  |
| Brown rice |         |                    |                    |                     |                     | 11.1              | -0.31 (-1.15,0.52) |
| Barley     |         |                    |                    |                     |                     |                   | 41.3               |

<sup>a</sup>Mean differences with 95% confidence intervals (row vs column). Mean differences lower than 0 indicate that the treatments specified in the row are more efficacious than those in the column. SUCRA values are given in the diagonal of parenthesis. The larger the SUCRA value, the better the treatment. SUCRA, surface under the cumulative ranking curve

**Supplemental Table 11** Sensitivity analysis when removing the studies with cluster crossover design for total cholesterol<sup>a</sup>

|            | Control | Wheat bran         | Wheat              | Oat bran            | Oat                 | Brown rice         | Barley             |
|------------|---------|--------------------|--------------------|---------------------|---------------------|--------------------|--------------------|
| Control    | 16.6    | -0.11 (-0.34,0.11) | -0.01 (-0.19,0.17) | -0.35 (-0.48,-0.22) | -0.26 (-0.37,-0.15) | -0.09 (-0.37,0.20) | -0.14 (-0.37,0.08) |
| Wheat bran |         | 45.3               | 0.10 (-0.17,0.37)  | -0.24 (-0.43,-0.05) | -0.15 (-0.38,0.09)  | 0.03 (-0.33,0.39)  | -0.03 (-0.35,0.28) |
| Wheat      |         |                    | 21.1               | -0.34 (-0.54,-0.14) | -0.25 (-0.44,-0.05) | -0.08 (-0.41,0.26) | -0.13 (-0.40,0.14) |
| Oat bran   |         |                    |                    | 96.1                | 0.09 (-0.06,0.25)   | 0.26 (-0.05,0.58)  | 0.21 (-0.05,0.46)  |
| Oat        |         |                    |                    |                     | 78.4                | 0.17 (-0.13,0.47)  | 0.11 (-0.13,0.36)  |
| Brown rice |         |                    |                    |                     |                     | 40.0               | -0.06 (-0.42,0.30) |
| Barley     |         |                    |                    |                     |                     |                    | 52.4               |

<sup>a</sup>Mean differences with 95% confidence intervals (row vs column). Mean differences lower than 0 indicate that the treatments specified in the row are more efficacious than those in the column. SUCRA values are given in the diagonal of parenthesis. The larger the SUCRA value, the better the treatment. SUCRA, surface under the cumulative ranking curve

**Supplemental Table 12** Sensitivity analysis when excluding the trials with the duration less than 3 weeks for total cholesterol<sup>a</sup>

|            | Control | Wheat bran         | Wheat              | Oat bran            | Oat                 | Brown rice         | Barley             |
|------------|---------|--------------------|--------------------|---------------------|---------------------|--------------------|--------------------|
| Control    | 19.0    | -0.05 (-0.25,0.15) | -0.01 (-0.18,0.16) | -0.36 (-0.48,-0.23) | -0.26 (-0.36,-0.16) | -0.09 (-0.36,0.19) | -0.14 (-0.36,0.08) |
| Wheat bran |         | 32.9               | 0.04 (-0.22,0.29)  | -0.31 (-0.49,-0.12) | -0.21 (-0.43,0.01)  | -0.04 (-0.38,0.30) | -0.09 (-0.39,0.20) |
| Wheat      |         |                    | 24.3               | -0.34 (-0.54,-0.15) | -0.25 (-0.44,-0.06) | -0.07 (-0.40,0.25) | -0.13 (-0.40,0.13) |
| Oat bran   |         |                    |                    | 97.1                | 0.10 (-0.05,0.24)   | 0.27 (-0.03,0.57)  | 0.21 (-0.04,0.46)  |
| Oat        |         |                    |                    |                     | 79.6                | 0.17 (-0.12,0.47)  | 0.12 (-0.12,0.35)  |
| Brown rice |         |                    |                    |                     |                     | 42.0               | -0.06 (-0.41,0.30) |
| Barley     |         |                    |                    |                     |                     |                    | 55.1               |

<sup>a</sup>Mean differences with 95% confidence intervals (row vs column). Mean differences lower than 0 indicate that the treatments specified in the row are more efficacious than those in the column. SUCRA values are given in the diagonal of parenthesis. The larger the SUCRA value, the better the treatment. SUCRA, surface under the cumulative ranking curve

**Supplemental Table 13** Sensitivity analysis when excluding the trials with the duration less than 4 weeks for total cholesterol<sup>a</sup>

|            | Control | Wheat bran         | Wheat              | Oat bran            | Oat                 | Brown rice         | Barley             |
|------------|---------|--------------------|--------------------|---------------------|---------------------|--------------------|--------------------|
| Control    | 20.0    | -0.05 (-0.24,0.15) | -0.00 (-0.18,0.18) | -0.35 (-0.47,-0.23) | -0.25 (-0.35,-0.14) | -0.09 (-0.36,0.19) | -0.14 (-0.36,0.08) |
| Wheat bran |         | 33.6               | 0.05 (-0.21,0.30)  | -0.30 (-0.49,-0.12) | -0.20 (-0.42,0.02)  | -0.04 (-0.38,0.30) | -0.10 (-0.39,0.20) |
| Wheat      |         |                    | 22.1               | -0.35 (-0.54,-0.16) | -0.25 (-0.44,-0.05) | -0.09 (-0.41,0.24) | -0.14 (-0.41,0.13) |
| Oat bran   |         |                    |                    | 97.1                | 0.10 (-0.04,0.25)   | 0.26 (-0.04,0.57)  | 0.21 (-0.04,0.46)  |
| Oat        |         |                    |                    |                     | 78.7                | 0.16 (-0.13,0.46)  | 0.11 (-0.13,0.34)  |
| Brown rice |         |                    |                    |                     |                     | 42.3               | -0.05 (-0.41,0.30) |
| Barley     |         |                    |                    |                     |                     |                    | 56.2               |

<sup>a</sup>Mean differences with 95% confidence intervals (row vs column). Mean differences lower than 0 indicate that the treatments specified in the row are more efficacious than those in the column. SUCRA values are given in the diagonal of parenthesis. The larger the SUCRA value, the better the treatment. SUCRA, surface under the cumulative ranking curve

**Supplemental Table 14** Sensitivity analysis when excluding the trials with intervention duration of 16 weeks and 12 months for total cholesterol<sup>a</sup>

|            | Control | Wheat bran         | Wheat              | Oat bran            | Oat                 | Brown rice         | Barley             |
|------------|---------|--------------------|--------------------|---------------------|---------------------|--------------------|--------------------|
| Control    | 13.6    | -0.09 (-0.28,0.10) | -0.01 (-0.18,0.16) | -0.35 (-0.47,-0.23) | -0.26 (-0.36,-0.16) | -0.22 (-0.54,0.10) | -0.14 (-0.36,0.08) |
| Wheat bran |         | 37.5               | 0.08 (-0.16,0.32)  | -0.26 (-0.43,-0.09) | -0.17 (-0.37,0.04)  | -0.13 (-0.50,0.24) | -0.05 (-0.34,0.23) |
| Wheat      |         |                    | 18.3               | -0.34 (-0.53,-0.15) | -0.25 (-0.44,-0.06) | -0.21 (-0.57,0.16) | -0.13 (-0.40,0.13) |
| Oat bran   |         |                    |                    | 93.7                | 0.09 (-0.05,0.24)   | 0.13 (-0.21,0.48)  | 0.21 (-0.04,0.46)  |
| Oat        |         |                    |                    |                     | 74.6                | 0.04 (-0.30,0.38)  | 0.12 (-0.12,0.35)  |
| Brown rice |         |                    |                    |                     |                     | 63.3               | 0.08 (-0.31,0.47)  |
| Barley     |         |                    |                    |                     |                     |                    | 49.0               |

<sup>a</sup>Mean differences with 95% confidence intervals (row vs column). Mean differences lower than 0 indicate that the treatments specified in the row are more efficacious than those in the column. SUCRA values are given in the diagonal of parenthesis. The larger the SUCRA value, the better the treatment. SUCRA, surface under the cumulative ranking curve

**Supplemental Table 15** Sensitivity analysis based on the studies with low risk of bias for total cholesterol<sup>a</sup>

|            | Control | Wheat bran         | Wheat              | Oat bran            | Oat                 | Brown rice        | Barley             |
|------------|---------|--------------------|--------------------|---------------------|---------------------|-------------------|--------------------|
| Control    | 31.5    | -0.14 (-0.40,0.12) | -0.01 (-0.25,0.23) | -0.37 (-0.51,-0.22) | -0.27 (-0.40,-0.13) | 0.30 (-0.32,0.92) | -0.03 (-0.67,0.61) |
| Wheat bran |         | 55.6               | 0.13 (-0.20,0.45)  | -0.23 (-0.44,-0.01) | -0.13 (-0.40,0.15)  | 0.44 (-0.23,1.11) | 0.11 (-0.57,0.80)  |
| Wheat      |         |                    | 34.9               | -0.36 (-0.60,-0.11) | -0.25 (-0.52,0.01)  | 0.31 (-0.35,0.98) | -0.02 (-0.70,0.66) |
| Oat bran   |         |                    |                    | 94.7                | 0.10 (-0.07,0.28)   | 0.67 (0.03,1.30)  | 0.34 (-0.31,0.99)  |
| Oat        |         |                    |                    |                     | 77.2                | 0.57 (-0.07,1.20) | 0.24 (-0.39,0.87)  |
| Brown rice |         |                    |                    |                     |                     | 12.4              | -0.33 (-1.22,0.57) |
| Barley     |         |                    |                    |                     |                     |                   | 43.7               |

<sup>a</sup>Mean differences with 95% confidence intervals (row vs column). Mean differences lower than 0 indicate that the treatments specified in the row are more efficacious than those in the column. SUCRA values are given in the diagonal of parenthesis. The larger the SUCRA value, the better the treatment. SUCRA, surface under the cumulative ranking curve



**Supplemental Table 16** Overall GRADE quality of evidence for total cholesterol from network meta-analysis<sup>a</sup>

| Comparisons           | Study limitations                                                           | Imprecision                    | Heterogeneity and Inconsistency                                                                                                                                                         | Indirectness                                                                                           | Publication bias                                                                                                                           | Confidence in MD for overall change in TC                                                       |
|-----------------------|-----------------------------------------------------------------------------|--------------------------------|-----------------------------------------------------------------------------------------------------------------------------------------------------------------------------------------|--------------------------------------------------------------------------------------------------------|--------------------------------------------------------------------------------------------------------------------------------------------|-------------------------------------------------------------------------------------------------|
| Barley vs Control     | 100% of the estimate from studies at high risk, and 0% at moderate risk     | MD -0.14, 95% CI (-0.37,0.08)  | Mild heterogeneity according to $I^2$ (0%) and $P$ (0.50) in direct comparisons. No inconsistency between the direct and indirect estimate (Node-split $P= 0.74$ and $\tau= 0.23$ )     | The treatment effects were not significantly influenced by clinical modifiers in the subgroup analyses | Undetectable by the routine method. The comparison-adjusted funnel plot for the network is not suggestive of any dominant publication bias | Very Low (Downgrade by three levels due to study limitations (for two levels), and imprecision) |
| Brown rice vs Control | 60% of the estimate from studies at high risk, and 20% at moderate risk     | MD -0.09, 95% CI (-0.37,0.19)  | Low heterogeneity according to $I^2$ (45.7%) and $P$ (0.10) in direct comparisons. Only direct comparisons and no node-splitting inconsistency                                          | The treatment effects were not significantly influenced by clinical modifiers in the subgroup analyses | Undetectable by the routine method. The comparison-adjusted funnel plot for the network is not suggestive of any dominant publication bias | Low (Downgrade by two levels due to study limitations and imprecision)                          |
| Oat vs Control        | 27.2% of the estimate from studies at high risk, and 27.2% at moderate risk | MD -0.26, 95% CI (-0.36,-0.15) | High heterogeneity according to $I^2$ (77.6%) and $P$ (<0.01) in direct comparisons. No inconsistency between the direct and indirect estimate (Node-split $P= 0.95$ and $\tau= 0.23$ ) | The treatment effects were not significantly influenced by clinical modifiers in the subgroup analyses | Undetectable by the routine method. The comparison-adjusted funnel plot for the network is not suggestive of any dominant publication bias | Low (Downgrade by two levels due to study limitations and Heterogeneity and Inconsistency)      |

Supplemental Table 16 Continued

| Comparisons           | Study limitations                                                       | Imprecision                    | Heterogeneity and Inconsistency                                                                                                                                                           | Indirectness                                                                                           | Publication bias                                                                                                                          | Confidence in MD for overall change in TC                              |
|-----------------------|-------------------------------------------------------------------------|--------------------------------|-------------------------------------------------------------------------------------------------------------------------------------------------------------------------------------------|--------------------------------------------------------------------------------------------------------|-------------------------------------------------------------------------------------------------------------------------------------------|------------------------------------------------------------------------|
| Oat bran vs Control   | 0% of the estimate from studies at high risk, and 100% at moderate risk | MD -0.35, 95% CI (-0.47,-0.23) | Moderate heterogeneity according to $I^2$ (55.8%) and $P$ (0.01) in direct comparisons No inconsistency between the direct and indirect estimate (Node-split $P= 0.98$ and $\tau= 0.23$ ) | The treatment effects were not significantly influenced by clinical modifiers in the subgroup analyses | Undetectable by the routine method The comparison-adjusted funnel plot for the network is not suggestive of any dominant publication bias | High                                                                   |
| Wheat vs Control      | 50% of the estimate from studies at high risk, and 25% at moderate risk | MD -0.01, 95% CI (-0.19,0.16)  | Moderate heterogeneity according to $I^2$ (58.9%) and $P$ (0.21) in direct comparisons No inconsistency between the direct and indirect estimate (Node-split $P= 0.65$ and $\tau= 0.23$ ) | The treatment effects were not significantly influenced by clinical modifiers in the subgroup analyses | Undetectable by the routine method The comparison-adjusted funnel plot for the network is not suggestive of any dominant publication bias | Low (Downgrade by two levels due to study limitations and imprecision) |
| Wheat bran vs Control | 50% of the estimate from studies at high risk, and 50% at moderate risk | MD -0.09, 95% CI (-0.28,0.09)  | Mild heterogeneity according to $I^2$ (0%) and $P$ (0.86) in direct comparisons No inconsistency between the direct and indirect estimate (Node-split $P= 0.83$ and $\tau= 0.23$ )        | The treatment effects were not significantly influenced by clinical modifiers in the subgroup analyses | Undetectable by the routine method The comparison-adjusted funnel plot for the network is not suggestive of any dominant publication bias | Low (Downgrade by two levels due to study limitations and imprecision) |

Supplemental Table 16 Continued

| Comparisons     | Study limitations                                                       | Imprecision                   | Heterogeneity and Inconsistency                                                                                                                                                      | Indirectness                                                                                           | Publication bias                                                                                                                          | Confidence in MD for overall change in TC            |
|-----------------|-------------------------------------------------------------------------|-------------------------------|--------------------------------------------------------------------------------------------------------------------------------------------------------------------------------------|--------------------------------------------------------------------------------------------------------|-------------------------------------------------------------------------------------------------------------------------------------------|------------------------------------------------------|
| Barley vs Oat   | 0% of the estimate from studies at high risk, and 100% at moderate risk | MD 0.12, 95% CI (-0.12,0.35)  | Mild heterogeneity according to $I^2$ (0%) and $P$ (0.67) in direct comparisons No inconsistency between the direct and indirect estimate (Node-split $P= 0.66$ and $\tau= 0.22$ )   | The treatment effects were not significantly influenced by clinical modifiers in the subgroup analyses | Undetectable by the routine method The comparison-adjusted funnel plot for the network is not suggestive of any dominant publication bias | Moderate (Downgrade by one level due to imprecision) |
| Barley vs Wheat | 0% of the estimate from studies at high risk, and 100% at moderate risk | MD -0.13, 95% CI (-0.40,0.13) | Only one head-to-head study, and no heterogeneity No inconsistency between the direct and indirect estimate (Node-split $P= 0.36$ and $\tau= 0.22$ )                                 | The treatment effects were not significantly influenced by clinical modifiers in the subgroup analyses | Undetectable by the routine method The comparison-adjusted funnel plot for the network is not suggestive of any dominant publication bias | Moderate (Downgrade by one level due to imprecision) |
| Oat vs Oat bran | 0% of the estimate from studies at high risk, and 100% at moderate risk | MD 0.09, 95% CI (-0.05,0.24)  | Low heterogeneity according to $I^2$ (48.4%) and $P$ (0.03) in direct comparisons No inconsistency between the direct and indirect estimate (Node-split $P= 0.15$ and $\tau= 0.23$ ) | The treatment effects were not significantly influenced by clinical modifiers in the subgroup analyses | Undetectable by the routine method The comparison-adjusted funnel plot for the network is not suggestive of any dominant publication bias | Moderate (Downgrade by one level due to imprecision) |

Supplemental Table 16 Continued

| Comparisons            | Study limitations                                                       | Imprecision                    | Heterogeneity and Inconsistency                                                                                                                                                      | Indirectness                                                                                            | Publication bias                                                                                                                          | Confidence in MD for overall change in TC                                |
|------------------------|-------------------------------------------------------------------------|--------------------------------|--------------------------------------------------------------------------------------------------------------------------------------------------------------------------------------|---------------------------------------------------------------------------------------------------------|-------------------------------------------------------------------------------------------------------------------------------------------|--------------------------------------------------------------------------|
| Oat vs Wheat           | 0% of the estimate from studies at high risk, and 100% at moderate risk | MD -0.25, 95% CI (-0.44,-0.06) | Mild heterogeneity according to $I^2$ (0%) and $P$ (0.88) in direct comparisons No inconsistency between the direct and indirect estimate (Node-split $P=0.34$ and $\tau=0.23$ )     | The treatment effects were significantly influenced by some clinical modifiers in the subgroup analyses | Undetectable by the routine method The comparison-adjusted funnel plot for the network is not suggestive of any dominant publication bias | Moderate (Downgrade by one level due to Indirectness)                    |
| Oat bran vs Wheat      | 0% of the estimate from studies at high risk, and 50% at moderate risk  | MD -0.34, 95% CI (-0.53,-0.15) | Mild heterogeneity according to $I^2$ (0%) and $P$ (0.94) in direct comparisons No inconsistency between the direct and indirect estimate (Node-split $P=0.45$ and $\tau=0.23$ )     | The treatment effects were not significantly influenced by clinical modifiers in the subgroup analyses  | Undetectable by the routine method The comparison-adjusted funnel plot for the network is not suggestive of any dominant publication bias | High                                                                     |
| Oat bran vs Wheat bran | 0% of the estimate from studies at high risk, and 100% at moderate risk | MD -0.26, 95% CI (-0.43,-0.09) | High heterogeneity according to $I^2$ (91.4%) and $P$ (<0.01) in direct comparisons No inconsistency between the direct and indirect estimate (Node-split $P=0.45$ and $\tau=0.23$ ) | The treatment effects were significantly influenced by some clinical modifiers in the subgroup analyses | Undetectable by the routine method The comparison-adjusted funnel plot for the network is not suggestive of any dominant publication bias | Moderate (Downgrade by one level due to Heterogeneity and Inconsistency) |

<sup>a</sup>The quality of evidence of network estimates for all outcomes by using the GRADE framework, which characterizes the quality of a body of evidence on the basis of the study limitations, imprecision, inconsistency, indirectness, and publication bias.

**Supplemental Fig. 5** Pairwise meta-analysis of LDL cholesterol. The square represents the overall estimated effects, and the results were obtained from a random-effects model. MD lower than 0 indicate that the former treatment is more efficacious than latter. MD, mean differences

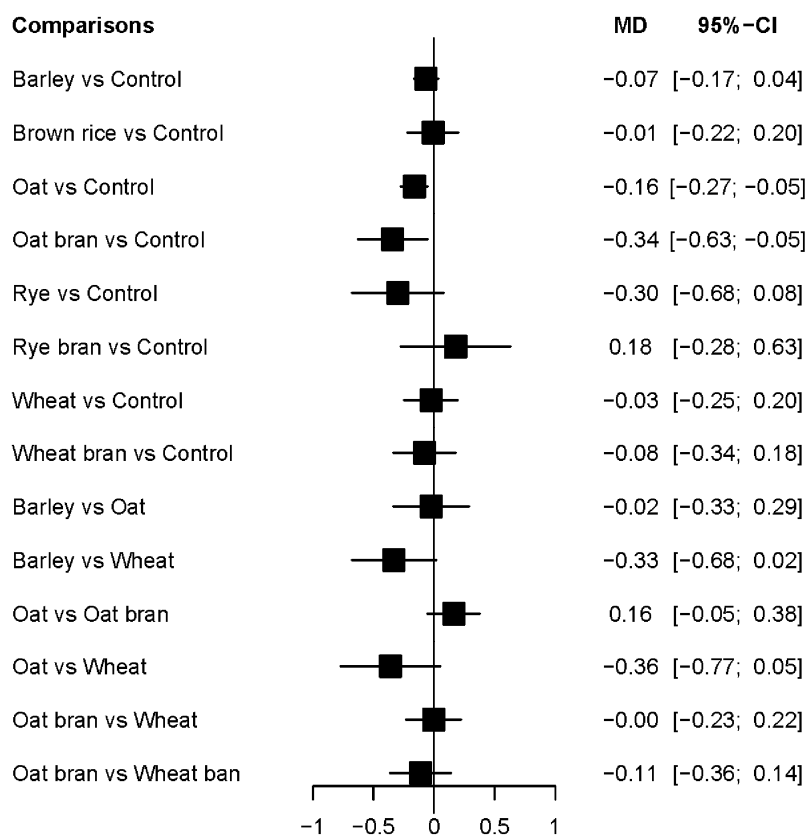

**Supplemental Table 17** Pairwise meta-analysis results for LDL cholesterol

| Comparisons            | No. of comparisons | Mean differences      |       |          | $P^b$ | $P^c$ (Egger's test) |
|------------------------|--------------------|-----------------------|-------|----------|-------|----------------------|
|                        |                    | (95% CI) <sup>a</sup> | $I^2$ | $\tau^2$ |       |                      |
| Barley vs Control      | 5                  | -0.07 (-0.17, 0.04)   | 51.8% | 0.00     | 0.08  | 0.10                 |
| Brown rice vs Control  | 8                  | -0.01 (-0.22, 0.20)   | 64.4% | 0.01     | 0.01  | 0.02                 |
| Oat vs Control         | 27                 | -0.16 (-0.27, -0.05)  | 82.6% | 0.06     | <0.01 | 0.03                 |
| Oat bran vs Control    | 20                 | -0.34 (-0.63, -0.05)  | 88.2% | 0.40     | <0.01 | 0.20                 |
| Rye vs Control         | 2                  | -0.30 (-0.68, 0.08)   | 0%    | 0.00     | 0.92  | -                    |
| Rye bran vs Control    | 1                  | 0.18 (-0.28, 0.63)    | -     | -        | -     | -                    |
| Wheat vs Control       | 5                  | -0.03 (-0.25, 0.20)   | 17.4% | 0.01     | 0.30  | 0.14                 |
| Wheat bran vs Control  | 5                  | -0.08 (-0.34, 0.18)   | 0%    | 0.00     | 0.93  | 0.27                 |
| Barley vs Oat          | 2                  | -0.02 (-0.33, 0.29)   | 0%    | 0.00     | 0.92  | -                    |
| Barley vs Wheat        | 1                  | -0.33 (-0.68, 0.02)   | -     | -        | -     | -                    |
| Oat vs Oat bran        | 9                  | 0.16 (-0.05, 0.38)    | 38.3% | 0.05     | 0.11  | <0.01                |
| Oat vs Wheat           | 1                  | -0.36 (-0.77, 0.05)   | -     | -        | -     | -                    |
| Oat bran vs Wheat      | 4                  | -0.00 (-0.23, 0.22)   | 0%    | 0.00     | 0.54  | -                    |
| Oat bran vs Wheat bran | 14                 | -0.11 (-0.36, 0.14)   | 82.9% | 0.20     | <0.01 | 0.11                 |

<sup>a</sup>Mean differences lower than 0 indicate that the former treatment is more efficacious than latter

<sup>b</sup> $P$  for the heterogeneity of pairwise meta-analysis. Heterogeneity was assessed by using Cochran's test, and  $P < 0.05$  was considered to indicate significant heterogeneity across studies

<sup>c</sup> $P$  for Egger's test.  $P < 0.05$  was considered to indicate a significant small-study effects

**Supplemental Table 18** Contribution of direct evidence to the network for LDL cholesterol

| Comparisons            | No. of comparisons | Contribution to the network (%) |
|------------------------|--------------------|---------------------------------|
| Control vs Barley      | 5                  | 13.6                            |
| Control vs Brown rice  | 8                  | 13.8                            |
| Control vs Oat         | 27                 | 15.1                            |
| Control vs Oat bran    | 20                 | 4.7                             |
| Control vs Wheat       | 4                  | 7.8                             |
| Control vs Wheat bran  | 5                  | 9.2                             |
| Barley vs Oat          | 2                  | 2.5                             |
| Barley vs Wheat        | 1                  | 3.8                             |
| Oat vs Oat bran        | 9                  | 8.7                             |
| Oat vs Wheat           | 2                  | 2.4                             |
| Oat bran vs Wheat      | 4                  | 8.7                             |
| Oat bran vs Wheat bran | 14                 | 9.7                             |

**Supplemental Fig. 6** Evaluation of inconsistency by using loop-specific approach for LDL cholesterol. IFs along with their confidence intervals are displayed. IFs are calculated as the absolute difference between direct and indirect estimates and therefore confidence intervals are truncated to 0. Loops that their lower CI limit does not reach the 0 line are considered to present statistically significant inconsistency. IF, inconsistency factor

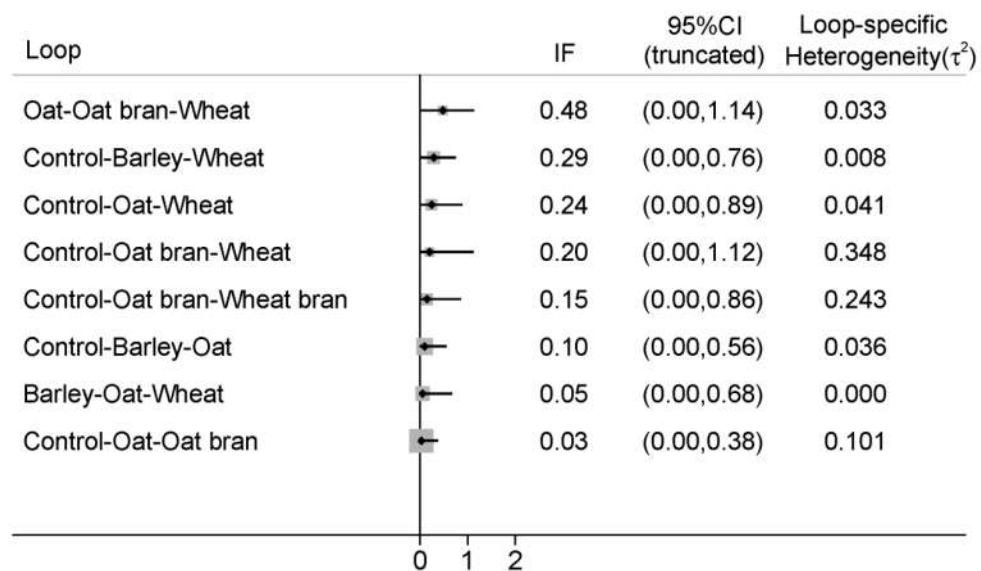



**Supplemental Table 19** Node-splitting method for assessment of inconsistency for LDL cholesterol

| Comparisons            | Direct      |           | Indirect    |           | Difference  |           | <i>P</i> <sup>a</sup> | tau       |
|------------------------|-------------|-----------|-------------|-----------|-------------|-----------|-----------------------|-----------|
|                        | Coefficient | SE        | Coefficient | SE        | Coefficient | SE        |                       |           |
| Control vs Barley      | -0.0843041  | 0.1187659 | -0.2814101  | 0.2006862 | 0.197106    | 0.2332019 | 0.40                  | 0.2530689 |
| Control vs Brown rice  | -           | -         | -           | -         | -           | -         | -                     | -         |
| Control vs Oat         | -0.1660878  | 0.0587448 | -0.1707995  | 0.1703731 | 0.0047118   | 0.180854  | 0.98                  | 0.2543625 |
| Control vs Oat bran    | -0.3646078  | 0.0749266 | -0.1627195  | 0.1304221 | -0.2018882  | 0.1515467 | 0.18                  | 0.2498449 |
| Control vs Wheat       | -0.0495226  | 0.1656789 | -0.0902376  | 0.1479257 | 0.040715    | 0.2221369 | 0.86                  | 0.2541878 |
| Control vs Wheat bran  | -0.0837884  | 0.1984157 | -0.1903042  | 0.1064717 | 0.1065157   | 0.2251754 | 0.64                  | 0.2540091 |
| Barley vs Oat          | 0.0189416   | 0.2452094 | -0.0440415  | 0.1250387 | 0.0629831   | 0.2752523 | 0.82                  | 0.2542608 |
| Barley vs Wheat        | 0.3299996   | 0.3090462 | -0.0062023  | 0.1576500 | 0.3362019   | 0.3469338 | 0.33                  | 0.2526716 |
| Oat vs Oat bran        | -0.1609932  | 0.1177595 | -0.1359142  | 0.1022543 | -0.025079   | 0.1560921 | 0.87                  | 0.2545929 |
| Oat vs Wheat           | 0.3599993   | 0.3285994 | 0.0552015   | 0.1262218 | 0.3047979   | 0.3520078 | 0.39                  | 0.2531356 |
| Oat bran vs Wheat      | 0.0524502   | 0.1746718 | 0.3793969   | 0.1489792 | -0.3269468  | 0.2297094 | 0.16                  | 0.2494842 |
| Oat bran vs Wheat bran | 0.132807    | 0.0819543 | 0.2393328   | 0.2098506 | -0.1065258  | 0.2251745 | 0.64                  | 0.2540091 |

<sup>a</sup>*P* for assessment of inconsistency. *P* < 0.05 was considered to indicate a significant inconsistency existed between direct and indirect evidence

**Supplemental Table 20** Comparative effects of different whole grains and brans on the control of LDL cholesterol<sup>a</sup>

|            | Control | Wheat bran         | Wheat              | Oat bran            | Oat                 | Brown rice         | Barley             |
|------------|---------|--------------------|--------------------|---------------------|---------------------|--------------------|--------------------|
| Control    | -       | -0.17 (-0.35,0.01) | -0.07 (-0.29,0.14) | -0.32 (-0.44,-0.19) | -0.17 (-0.28,-0.07) | -0.01 (-0.25,0.22) | -0.14 (-0.33,0.06) |
| Wheat bran |         | -                  | 0.10 (-0.17,0.36)  | -0.15 (-0.30,-0.00) | -0.00 (-0.20,0.20)  | 0.15 (-0.14,0.45)  | 0.03 (-0.23,0.30)  |
| Wheat      |         |                    | -                  | -0.24 (-0.47,-0.02) | -0.10 (-0.33,0.13)  | 0.06 (-0.26,0.38)  | -0.06 (-0.34,0.21) |
| Oat bran   |         |                    |                    | -                   | 0.15 (-0.00,0.29)   | 0.30 (0.04,0.57)   | 0.18 (-0.05,0.41)  |
| Oat        |         |                    |                    |                     | -                   | 0.16 (-0.10,0.41)  | 0.04 (-0.18,0.25)  |
| Brown rice |         |                    |                    |                     |                     | -                  | -0.12 (-0.43,0.18) |
| Barley     |         |                    |                    |                     |                     |                    | -                  |

<sup>a</sup>Mean differences with 95% confidence intervals (column vs row). Mean differences lower than 0 indicate that the treatments specified in the row are more efficacious than those in the column

---

**Supplemental Table 21** Detailed ranking results of the comparative effects of different whole grains and brans on the control of LDL cholesterol. The larger the SUCRA value, the better the treatment. SUCRA, surface under the cumulative ranking curve

| Treatments | SUCRA (%) | MeanRank |
|------------|-----------|----------|
| Control    | 13.8      | 6.2      |
| Barley     | 53.4      | 3.8      |
| Brown rice | 24.0      | 5.6      |
| Oat        | 63.6      | 3.2      |
| Oat bran   | 97.4      | 1.2      |
| Wheat      | 37.1      | 4.8      |
| Wheat bran | 60.7      | 3.4      |

**Supplemental Table 22** Sensitivity analysis using an inconsistency model for LDL cholesterol<sup>a</sup>

|            | Control | Wheat bran        | Wheat               | Oat bran           | Oat                | Brown rice         | Barley             |
|------------|---------|-------------------|---------------------|--------------------|--------------------|--------------------|--------------------|
| Control    | 23.8    | 0.00 (-0.30,0.31) | -0.16 (-0.29,-0.02) | 0.09 (-0.46,0.64)  | -0.05 (-0.33,0.23) | -0.02 (-0.25,0.22) | -0.08 (-0.32,0.15) |
| Wheat bran |         | 47.7              | 0.03 (-0.48,0.54)   | -0.28 (-0.74,0.18) | -0.07 (-0.48,0.34) | 0.07 (-0.39,0.53)  | -0.00 (-0.46,0.46) |
| Wheat      |         |                   | 39.7                | -0.32 (-0.72,0.09) | -0.11 (-0.46,0.25) | 0.03 (-0.37,0.44)  | -0.03 (-0.44,0.37) |
| Oat bran   |         |                   |                     | 94.7               | 0.21 (-0.07,0.48)  | 0.35 (0.01,0.69)   | 0.28 (-0.06,0.62)  |
| Oat        |         |                   |                     |                    | 65.5               | 0.14 (-0.13,0.41)  | 0.07 (-0.20,0.34)  |
| Brown rice |         |                   |                     |                    |                    | 31.4               | -0.07 (-0.40,0.27) |
| Barley     |         |                   |                     |                    |                    |                    | 47.2               |

<sup>a</sup>Mean differences with 95% confidence intervals (row vs column). Mean differences lower than 0 indicate that the treatments specified in the row are more efficacious than those in the column. SUCRA values are given in the diagonal of parenthesis. The larger the SUCRA value, the better the treatment. SUCRA, surface under the cumulative ranking curve

**Supplemental Table 23** Sensitivity analysis based on the studies only included dyslipidemic participants for LDL cholesterol<sup>a</sup>

|            | Control | Wheat bran          | Wheat              | Oat bran            | Oat                 | Brown rice         | Barley             |
|------------|---------|---------------------|--------------------|---------------------|---------------------|--------------------|--------------------|
| Control    | 16.5    | -0.28 (-0.50,-0.05) | -0.04 (-0.28,0.20) | -0.41 (-0.56,-0.25) | -0.19 (-0.32,-0.07) | -0.03 (-0.33,0.28) | -0.11 (-0.36,0.14) |
| Wheat bran |         | 74.0                | 0.24 (-0.07,0.54)  | -0.13 (-0.30,0.04)  | 0.08 (-0.16,0.33)   | 0.25 (-0.14,0.63)  | 0.17 (-0.17,0.50)  |
| Wheat      |         |                     | 28.5               | -0.37 (-0.62,-0.11) | -0.15 (-0.41,0.10)  | 0.01 (-0.38,0.40)  | -0.07 (-0.39,0.25) |
| Oat bran   |         |                     |                    | 98.1                | 0.21 (0.04,0.39)    | 0.38 (0.03,0.72)   | 0.29 (0.01,0.58)   |
| Oat        |         |                     |                    |                     | 62.1                | 0.16 (-0.17,0.50)  | 0.08 (-0.18,0.35)  |
| Brown rice |         |                     |                    |                     |                     | 28.0               | -0.08 (-0.48,0.31) |
| Barley     |         |                     |                    |                     |                     |                    | 42.8               |

<sup>a</sup>Mean differences with 95% confidence intervals (row vs column). Mean differences lower than 0 indicate that the treatments specified in the row are more efficacious than those in the column. SUCRA values are given in the diagonal of parenthesis. The larger the SUCRA value, the better the treatment. SUCRA, surface under the cumulative ranking curve

**Supplemental Table 24** Sensitivity analysis based on the studies with parallel design for LDL cholesterol<sup>a</sup>

|            | Control | Wheat bran         | Wheat              | Oat bran            | Oat                 | Brown rice        | Barley             |
|------------|---------|--------------------|--------------------|---------------------|---------------------|-------------------|--------------------|
| Control    | 16.8    | -0.23 (-0.46,0.01) | -0.14 (-0.39,0.11) | -0.39 (-0.55,-0.23) | -0.18 (-0.30,-0.06) | 0.05 (-0.26,0.35) | -0.20 (-0.71,0.31) |
| Wheat bran |         | 63.5               | 0.09 (-0.22,0.40)  | -0.16 (-0.34,0.01)  | 0.05 (-0.20,0.30)   | 0.28 (-0.11,0.66) | 0.03 (-0.52,0.59)  |
| Wheat      |         |                    | 47.6               | -0.25 (-0.50,0.00)  | -0.04 (-0.30,0.23)  | 0.19 (-0.21,0.59) | -0.06 (-0.62,0.51) |
| Oat bran   |         |                    |                    | 94.9                | 0.21 (0.04,0.39)    | 0.44 (0.10,0.78)  | 0.19 (-0.33,0.72)  |
| Oat        |         |                    |                    |                     | 55.8                | 0.23 (-0.10,0.56) | -0.02 (-0.52,0.48) |
| Brown rice |         |                    |                    |                     |                     | 15.6              | -0.25 (-0.84,0.35) |
| Barley     |         |                    |                    |                     |                     |                   | 55.9               |

<sup>a</sup>Mean differences with 95% confidence intervals (row vs column). Mean differences lower than 0 indicate that the treatments specified in the row are more efficacious than those in the column. SUCRA values are given in the diagonal of parenthesis. The larger the SUCRA value, the better the treatment. SUCRA, surface under the cumulative ranking curve

**Supplemental Table 25** Sensitivity analysis when removing the studies with cluster crossover design for LDL cholesterol<sup>a</sup>

|            | Control | Wheat bran         | Wheat              | Oat bran            | Oat                 | Brown rice         | Barley             |
|------------|---------|--------------------|--------------------|---------------------|---------------------|--------------------|--------------------|
| Control    | 13.9    | -0.18 (-0.38,0.02) | -0.07 (-0.29,0.14) | -0.32 (-0.45,-0.19) | -0.17 (-0.28,-0.06) | -0.02 (-0.25,0.22) | -0.14 (-0.34,0.07) |
| Wheat bran |         | 62.9               | 0.11 (-0.17,0.38)  | -0.14 (-0.30,0.02)  | 0.01 (-0.20,0.23)   | 0.16 (-0.15,0.47)  | 0.04 (-0.24,0.32)  |
| Wheat      |         |                    | 36.2               | -0.24 (-0.47,-0.02) | -0.09 (-0.33,0.14)  | 0.06 (-0.26,0.38)  | -0.06 (-0.34,0.22) |
| Oat bran   |         |                    |                    | 97.2                | 0.15 (-0.00,0.30)   | 0.30 (0.03,0.57)   | 0.18 (-0.05,0.42)  |
| Oat        |         |                    |                    |                     | 62.0                | 0.15 (-0.11,0.41)  | 0.03 (-0.19,0.25)  |
| Brown rice |         |                    |                    |                     |                     | 24.3               | -0.12 (-0.43,0.19) |
| Barley     |         |                    |                    |                     |                     |                    | 53.5               |

<sup>a</sup>Mean differences with 95% confidence intervals (row vs column). Mean differences lower than 0 indicate that the treatments specified in the row are more efficacious than those in the column. SUCRA values are given in the diagonal of parenthesis. The larger the SUCRA value, the better the treatment. SUCRA, surface under the cumulative ranking curve

**Supplemental Table 26** Sensitivity analysis when excluding the trials with the duration less than 3 weeks for LDL cholesterol<sup>a</sup>

|            | Control | Wheat bran         | Wheat              | Oat bran            | Oat                 | Brown rice         | Barley             |
|------------|---------|--------------------|--------------------|---------------------|---------------------|--------------------|--------------------|
| Control    | 14.1    | -0.16 (-0.35,0.03) | -0.08 (-0.29,0.14) | -0.33 (-0.46,-0.20) | -0.17 (-0.28,-0.06) | -0.01 (-0.25,0.22) | -0.14 (-0.34,0.06) |
| Wheat bran |         | 59.8               | 0.08 (-0.19,0.35)  | -0.17 (-0.33,-0.01) | -0.01 (-0.22,0.20)  | 0.14 (-0.16,0.45)  | 0.02 (-0.25,0.30)  |
| Wheat      |         |                    | 37.5               | -0.25 (-0.47,-0.03) | -0.09 (-0.32,0.14)  | 0.06 (-0.26,0.38)  | -0.06 (-0.33,0.22) |
| Oat bran   |         |                    |                    | 98.0                | 0.16 (0.01,0.31)    | 0.31 (0.04,0.58)   | 0.19 (-0.04,0.42)  |
| Oat        |         |                    |                    |                     | 63.5                | 0.15 (-0.10,0.41)  | 0.03 (-0.18,0.25)  |
| Brown rice |         |                    |                    |                     |                     | 23.4               | -0.12 (-0.43,0.19) |
| Barley     |         |                    |                    |                     |                     |                    | 53.7               |

<sup>a</sup>Mean differences with 95% confidence intervals (row vs column). Mean differences lower than 0 indicate that the treatments specified in the row are more efficacious than those in the column. SUCRA values are given in the diagonal of parenthesis. The larger the SUCRA value, the better the treatment. SUCRA, surface under the cumulative ranking curve



**Supplemental Table 27** Sensitivity analysis when excluding the trials with the duration less than 4 weeks for LDL cholesterol<sup>a</sup>

|            | Control | Wheat bran         | Wheat              | Oat bran            | Oat                 | Brown rice         | Barley             |
|------------|---------|--------------------|--------------------|---------------------|---------------------|--------------------|--------------------|
| Control    | 15.5    | -0.15 (-0.35,0.04) | -0.07 (-0.29,0.16) | -0.32 (-0.45,-0.19) | -0.16 (-0.27,-0.05) | -0.02 (-0.25,0.22) | -0.12 (-0.35,0.10) |
| Wheat bran |         | 60.0               | 0.09 (-0.19,0.37)  | -0.17 (-0.33,-0.00) | -0.00 (-0.22,0.21)  | 0.14 (-0.17,0.45)  | 0.03 (-0.26,0.32)  |
| Wheat      |         |                    | 36.6               | -0.25 (-0.49,-0.02) | -0.09 (-0.33,0.15)  | 0.05 (-0.28,0.38)  | -0.06 (-0.35,0.24) |
| Oat bran   |         |                    |                    | 97.8                | 0.16 (0.01,0.32)    | 0.31 (0.03,0.58)   | 0.20 (-0.06,0.45)  |
| Oat        |         |                    |                    |                     | 62.9                | 0.14 (-0.12,0.41)  | 0.03 (-0.21,0.28)  |
| Brown rice |         |                    |                    |                     |                     | 25.1               | -0.11 (-0.43,0.21) |
| Barley     |         |                    |                    |                     |                     |                    | 52.0               |

<sup>a</sup>Mean differences with 95% confidence intervals (row vs column). Mean differences lower than 0 indicate that the treatments specified in the row are more efficacious than those in the column. SUCRA values are given in the diagonal of parenthesis. The larger the SUCRA value, the better the treatment. SUCRA, surface under the cumulative ranking curve

**Supplemental Table 28** Sensitivity analysis when excluding the trials with intervention duration of 16 weeks and 12 months for LDL cholesterol<sup>a</sup>

|            | Control | Wheat bran         | Wheat              | Oat bran            | Oat                 | Brown rice         | Barley             |
|------------|---------|--------------------|--------------------|---------------------|---------------------|--------------------|--------------------|
| Control    | 10.3    | -0.17 (-0.35,0.02) | -0.07 (-0.29,0.14) | -0.31 (-0.44,-0.19) | -0.17 (-0.27,-0.06) | -0.10 (-0.36,0.16) | -0.14 (-0.33,0.06) |
| Wheat bran |         | 58.3               | 0.09 (-0.17,0.36)  | -0.15 (-0.30,0.00)  | -0.00 (-0.20,0.20)  | 0.07 (-0.25,0.39)  | 0.03 (-0.24,0.30)  |
| Wheat      |         |                    | 32.6               | -0.24 (-0.46,-0.02) | -0.09 (-0.32,0.14)  | -0.03 (-0.37,0.31) | -0.06 (-0.34,0.21) |
| Oat bran   |         |                    |                    | 96.6                | 0.15 (-0.00,0.30)   | 0.21 (-0.08,0.51)  | 0.18 (-0.05,0.41)  |
| Oat        |         |                    |                    |                     | 60.2                | 0.07 (-0.22,0.35)  | 0.03 (-0.18,0.25)  |
| Brown rice |         |                    |                    |                     |                     | 42.1               | -0.04 (-0.37,0.29) |
| Barley     |         |                    |                    |                     |                     |                    | 49.8               |

<sup>a</sup>Mean differences with 95% confidence intervals (row vs column). Mean differences lower than 0 indicate that the treatments specified in the row are more efficacious than those in the column. SUCRA values are given in the diagonal of parenthesis. The larger the SUCRA value, the better the treatment. SUCRA, surface under the cumulative ranking curve

**Supplemental Table 29** Sensitivity analysis based on the studies that with low risk of bias for LDL cholesterol<sup>a</sup>

|            | Control | Wheat bran         | Wheat              | Oat bran            | Oat                 | Brown rice        | Barley             |
|------------|---------|--------------------|--------------------|---------------------|---------------------|-------------------|--------------------|
| Control    | 23.1    | -0.21 (-0.44,0.03) | -0.10 (-0.41,0.22) | -0.33 (-0.49,-0.18) | -0.20 (-0.34,-0.06) | 0.30 (-0.29,0.89) | -0.21 (-0.75,0.32) |
| Wheat bran |         | 62.4               | 0.11 (-0.24,0.46)  | -0.13 (-0.30,0.05)  | 0.01 (-0.24,0.26)   | 0.51 (-0.12,1.14) | -0.01 (-0.59,0.57) |
| Wheat      |         |                    | 42.7               | -0.24 (-0.54,0.06)  | -0.10 (-0.42,0.22)  | 0.40 (-0.27,1.06) | -0.12 (-0.73,0.49) |
| Oat bran   |         |                    |                    | 90.5                | 0.14 (-0.04,0.32)   | 0.63 (0.03,1.24)  | 0.12 (-0.43,0.67)  |
| Oat        |         |                    |                    |                     | 61.4                | 0.50 (-0.11,1.10) | -0.02 (-0.54,0.50) |
| Brown rice |         |                    |                    |                     |                     | 9.0               | -0.51 (-1.31,0.28) |
| Barley     |         |                    |                    |                     |                     |                   | 61.0               |

<sup>a</sup>Mean differences with 95% confidence intervals (row vs column). Mean differences lower than 0 indicate that the treatments specified in the row are more efficacious than those in the column. SUCRA values are given in the diagonal of parenthesis. The larger the SUCRA value, the better the treatment. SUCRA, surface under the cumulative ranking curve

**Supplemental Table 30** Overall GRADE quality of evidence for LDL cholesterol from network meta-analysis<sup>a</sup>

| Comparisons           | Study limitations                                                           | Imprecision                    | Heterogeneity and Inconsistency                                                                                                                                                           | Indirectness                                                                                           | Publication bias                                                                                                                          | Confidence in MD for overall change in LDL                                                        |
|-----------------------|-----------------------------------------------------------------------------|--------------------------------|-------------------------------------------------------------------------------------------------------------------------------------------------------------------------------------------|--------------------------------------------------------------------------------------------------------|-------------------------------------------------------------------------------------------------------------------------------------------|---------------------------------------------------------------------------------------------------|
| Barley vs Control     | 100% of the estimate from studies at high risk, and 0% at moderate risk     | MD -0.14, 95% CI (-0.33,0.06)  | Moderate heterogeneity according to $I^2$ (51.8%) and $P$ (0.04) in direct comparisons No inconsistency between the direct and indirect estimate (Node-split $P= 0.40$ and $\tau= 0.25$ ) | The treatment effects were not significantly influenced by clinical modifiers in the subgroup analyses | Undetectable by the routine method The comparison-adjusted funnel plot for the network is not suggestive of any dominant publication bias | Very Low (Downgrade by three levels due to study limitations (for two levels) and imprecision)    |
| Brown rice vs Control | 60% of the estimate from studies at high risk, and 20% at moderate risk     | MD -0.01, 95% CI (-0.25,0.22)  | Moderate heterogeneity according to $I^2$ (64.4%) and $P$ (0.01) in direct comparisons Only direct comparisons and no node-splitting inconsistency                                        | The treatment effects were not significantly influenced by clinical modifiers in the subgroup analyses | Undetectable by the routine method The comparison-adjusted funnel plot for the network is not suggestive of any dominant publication bias | Low (Downgrade by two levels due to study limitations and imprecision)                            |
| Oat vs Control        | 27.2% of the estimate from studies at high risk, and 27.2% at moderate risk | MD -0.17, 95% CI (-0.28,-0.07) | High heterogeneity according to $I^2$ (82.6%) and $P$ (<0.01) in direct comparisons No inconsistency between the direct and indirect estimate (Node-split $P= 0.98$ and $\tau= 0.25$ )    | The treatment effects were not significantly influenced by clinical modifiers in the subgroup analyses | Undetectable by the routine method The comparison-adjusted funnel plot for the network is not suggestive of any dominant publication bias | Very Low (Downgrade by three levels due to study limitations and Heterogeneity and Inconsistency) |

Supplemental Table 30 Continued

| Comparisons           | Study limitations                                                       | Imprecision                    | Heterogeneity and Inconsistency                                                                                                                                                       | Indirectness                                                                                           | Publication bias                                                                                                                          | Confidence in MD for overall change in LDL                               |
|-----------------------|-------------------------------------------------------------------------|--------------------------------|---------------------------------------------------------------------------------------------------------------------------------------------------------------------------------------|--------------------------------------------------------------------------------------------------------|-------------------------------------------------------------------------------------------------------------------------------------------|--------------------------------------------------------------------------|
| Oat bran vs Control   | 0% of the estimate from studies at high risk, and 100% at moderate risk | MD -0.32, 95% CI (-0.44,-0.19) | High heterogeneity according to $I^2$ (88.2%) and $P$ (<0.01) in direct comparisons No inconsistency between the direct and indirect estimate (Node-split $P= 0.18$ and $\tau=0.24$ ) | The treatment effects were not significantly influenced by clinical modifiers in the subgroup analyses | Undetectable by the routine method The comparison-adjusted funnel plot for the network is not suggestive of any dominant publication bias | Moderate (Downgrade by one level due to Heterogeneity and Inconsistency) |
| Wheat vs Control      | 50% of the estimate from studies at high risk, and 25% at moderate risk | MD -0.07, 95% CI (-0.29,0.14)  | Mild heterogeneity according to $I^2$ (17.4%) and $P$ (0.29) in direct comparisons No inconsistency between the direct and indirect estimate (Node-split $P= 0.86$ and $\tau= 0.25$ ) | The treatment effects were not significantly influenced by clinical modifiers in the subgroup analyses | Undetectable by the routine method The comparison-adjusted funnel plot for the network is not suggestive of any dominant publication bias | Low (Downgrade by two levels due to study limitations and imprecision)   |
| Wheat bran vs Control | 50% of the estimate from studies at high risk, and 50% at moderate risk | MD -0.17, 95% CI (-0.35,0.01)  | Mild heterogeneity according to $I^2$ (0%) and $P$ (0.91) in direct comparisons No inconsistency between the direct and indirect estimate (Node-split $P= 0.64$ and $\tau=0.25$ )     | The treatment effects were not significantly influenced by clinical modifiers in the subgroup analyses | Undetectable by the routine method The comparison-adjusted funnel plot for the network is not suggestive of any dominant publication bias | Low (Downgrade by two levels due to study limitations and imprecision)   |

Supplemental Table 30 Continued

| Comparisons     | Study limitations                                                       | Imprecision                    | Heterogeneity and Inconsistency                                                                                                                                                          | Indirectness                                                                                           | Publication bias                                                                                                                          | Confidence in MD for overall change in LDL           |
|-----------------|-------------------------------------------------------------------------|--------------------------------|------------------------------------------------------------------------------------------------------------------------------------------------------------------------------------------|--------------------------------------------------------------------------------------------------------|-------------------------------------------------------------------------------------------------------------------------------------------|------------------------------------------------------|
| Barley vs Oat   | 0% of the estimate from studies at high risk, and 100% at moderate risk | MD -0.02, 95% CI (-0.33, 0.29) | Mild heterogeneity according to $I^2$ (0%) and $P$ (0.92) in direct comparisons No inconsistency between the direct and indirect estimate (Node-split $P= 0.82$ and $\tau= 0.25$ )       | The treatment effects were not significantly influenced by clinical modifiers in the subgroup analyses | Undetectable by the routine method The comparison-adjusted funnel plot for the network is not suggestive of any dominant publication bias | Moderate (Downgrade by one level due to imprecision) |
| Barley vs Wheat | 0% of the estimate from studies at high risk, and 100% at moderate risk | MD -0.06 95% CI (-0.34,0.21)   | Only one head-to-head study, and no heterogeneity No inconsistency between the direct and indirect estimate (Node-split $P= 0.33$ and $\tau= 0.25$ )                                     | The treatment effects were not significantly influenced by clinical modifiers in the subgroup analyses | Undetectable by the routine method The comparison-adjusted funnel lot for the network is not suggestive of any dominant publication bias  | Moderate (Downgrade by one level due to imprecision) |
| Oat vs Oat bran | 0% of the estimate from studies at high risk, and 100% at moderate risk | MD 0.15, 95% CI (-0.00,0.29)   | Low heterogeneity according to $I^2$ (38.3%) and $P$ (0.07) in direct comparisons No inconsistency between the direct and indirect estimate (Node-split $P= 0.6477$ and $\tau= 0.3130$ ) | The treatment effects were not significantly influenced by clinical modifiers in the subgroup analyses | Undetectable by the routine method The comparison-adjusted funnel plot for the network is not suggestive of any dominant publication bias | Moderate (Downgrade by one level due to imprecision) |

Supplemental Table 30 Continued

| Comparisons            | Study limitations                                                       | Imprecision                    | Heterogeneity and Inconsistency                                                                                                                                                       | Indirectness                                                                                                | Publication bias                                                                                                                          | Confidence in MD for overall change in LDL                                           |
|------------------------|-------------------------------------------------------------------------|--------------------------------|---------------------------------------------------------------------------------------------------------------------------------------------------------------------------------------|-------------------------------------------------------------------------------------------------------------|-------------------------------------------------------------------------------------------------------------------------------------------|--------------------------------------------------------------------------------------|
| Oat vs Wheat           | 0% of the estimate from studies at high risk, and 100% at moderate risk | MD -0.10, 95% CI (-0.33,0.13)  | Only one head-to-head study, and no heterogeneity No inconsistency between the direct and indirect estimate (Node-split $P=0.87$ and $\tau=0.25$ )                                    | The treatment effects were not significantly influenced by clinical modifiers in the subgroup analyses      | Undetectable by the routine method The comparison-adjusted funnel plot for the network is not suggestive of any dominant publication bias | Moderate (Downgrade by one level due to imprecision)                                 |
| Oat bran vs Wheat      | 0% of the estimate from studies at high risk, and 50% at moderate risk  | MD -0.24, 95% CI (-0.47,-0.02) | Mild heterogeneity according to $I^2$ (0%) and $P$ (0.48) in direct comparisons No inconsistency between the direct and indirect estimate (Node-split $P=0.39$ and $\tau=0.25$ )      | The treatment effects were not significantly influenced by some clinical modifiers in the subgroup analyses | Undetectable by the routine method The comparison-adjusted funnel plot for the network is not suggestive of any dominant publication bias | High                                                                                 |
| Oat bran vs Wheat bran | 0% of the estimate from studies at high risk, and 100% at moderate risk | MD -0.15, 95% CI (-0.30,-0.00) | High heterogeneity according to $I^2$ (82.9%) and $P$ (< 0.01) in direct comparisons No inconsistency between the direct and indirect estimate (Node-split $P=0.64$ and $\tau=0.25$ ) | The treatment effects were not significantly influenced by clinical modifiers in the subgroup analyses      | Undetectable by the routine method The comparison-adjusted funnel plot for the network is not suggestive of any dominant publication bias | Low (Downgrade by two levels due to imprecision and Heterogeneity and Inconsistency) |

<sup>a</sup>The quality of evidence of network estimates for all outcomes by using the GRADE framework, which characterizes the quality of a body of evidence on the basis of the study limitations, imprecision, inconsistency, indirectness, and publication bias.

**Supplemental Fig. 7** Pairwise meta-analysis of HDL cholesterol. The square represents the overall estimated effects, and the results were obtained from a random-effects model. MD lower than 0 indicate that the former treatment is more efficacious than latter. MD, mean differences

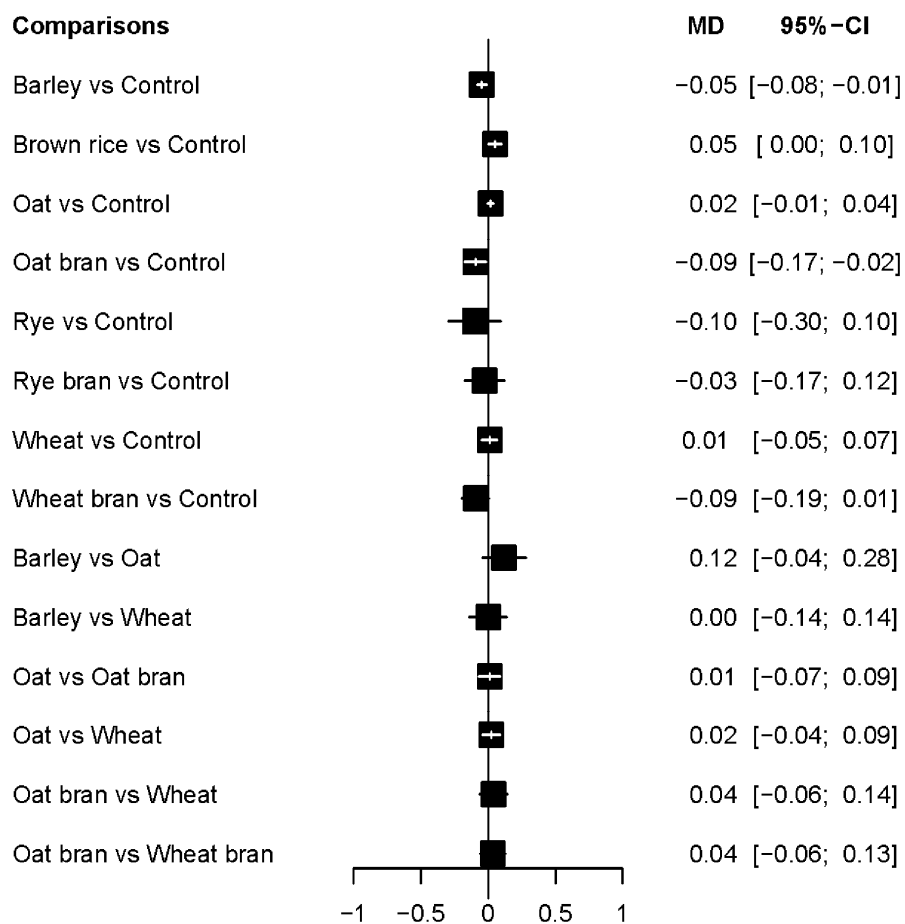



**Supplemental Table 31** Pairwise meta-analysis results for HDL cholesterol

| Comparisons            | No. of comparisons | Mean differences      |                       |          |                       |                                      |
|------------------------|--------------------|-----------------------|-----------------------|----------|-----------------------|--------------------------------------|
|                        |                    | (95% CI) <sup>a</sup> | <i>I</i> <sup>2</sup> | $\tau^2$ | <i>P</i> <sup>b</sup> | <i>P</i> <sup>c</sup> (Egger's test) |
| Barley vs Control      | 5                  | -0.05 (-0.08, -0.01)  | 0%                    | 0.00     | 0.95                  | 0.02                                 |
| Brown rice vs Control  | 8                  | 0.05 (-0.00, 0.10)    | 0%                    | 0.00     | 0.73                  | 0.01                                 |
| Oat vs Control         | 27                 | 0.02 (-0.01, 0.04)    | 56.4%                 | 0.00     | <0.01                 | 0.85                                 |
| Oat bran vs Control    | 19                 | -0.09 (-0.17, -0.02)  | 65.5%                 | 0.02     | <0.01                 | 0.03                                 |
| Rye vs Control         | 2                  | -0.10 (-0.30, 0.10)   | 0%                    | 0.00     | 0.97                  | -                                    |
| Rye bran vs Control    | 1                  | -0.03 (-0.17, 0.12)   | -                     | -        | -                     | -                                    |
| Wheat vs Control       | 6                  | 0.01 (-0.05, 0.07)    | 0%                    | 0.00     | 0.92                  | 0.63                                 |
| Wheat bran vs Control  | 5                  | -0.09 (-0.19, 0.01)   | 0%                    | 0.00     | 0.72                  | 0.54                                 |
| Barley vs Oat          | 2                  | 0.12 (-0.04, 0.28)    | 41.4%                 | 0.00     | 0.19                  | -                                    |
| Barley vs Wheat        | 1                  | 0.00 (-0.14, 0.14)    | -                     | -        | -                     | -                                    |
| Oat vs Oat bran        | 9                  | 0.01 (-0.07, 0.09)    | 0%                    | 0.00     | 0.99                  | <0.01                                |
| Oat vs Wheat           | 2                  | 0.02 (-0.04, 0.09)    | 0%                    | 0.00     | 0.93                  | -                                    |
| Oat bran vs Wheat      | 4                  | 0.04 (-0.06, 0.14)    | 0%                    | 0.00     | 0.97                  | -                                    |
| Oat bran vs Wheat bran | 10                 | 0.04 (-0.06, 0.13)    | 88.0%                 | 0.01     | <0.01                 | <0.01                                |

<sup>a</sup>Mean differences lower than 0 indicate that the former treatment is more efficacious than latter

<sup>b</sup>*P* for the heterogeneity of pairwise meta-analysis. Heterogeneity was assessed by using Cochran's test, and *P* < 0.05 was considered to indicate significant heterogeneity across studies

<sup>c</sup>*P* for Egger's test. *P* < 0.05 was considered to indicate a significant small-study effects

**Supplemental Table 32** Contribution of direct evidence to the network for HDL cholesterol

| Comparisons            | No. of comparisons | Contribution to the network (%) |
|------------------------|--------------------|---------------------------------|
| Control vs Barley      | 5                  | 14.2                            |
| Control vs Brown rice  | 8                  | 14.7                            |
| Control vs Oat         | 27                 | 16.3                            |
| Control vs Oat bran    | 19                 | 15.7                            |
| Control vs Wheat       | 6                  | 7.5                             |
| Control vs Wheat bran  | 5                  | 7.6                             |
| Barley vs Oat          | 2                  | 0.9                             |
| Barley vs Wheat        | 1                  | 2.0                             |
| Oat vs Oat bran        | 9                  | 3.4                             |
| Oat vs Wheat           | 2                  | 5.8                             |
| Oat bran vs Wheat      | 4                  | 3.6                             |
| Oat bran vs Wheat bran | 10                 | 8.5                             |

**Supplemental Fig. 8** Evaluation of inconsistency by using loop-specific approach for HDL cholesterol. IFs along with their confidence intervals are displayed. IFs are calculated as the absolute difference between direct and indirect estimates and therefore confidence intervals are truncated to 0. Loops that their lower CI limit does not reach the 0 line are considered to present statistically significant inconsistency. IF, inconsistency factor

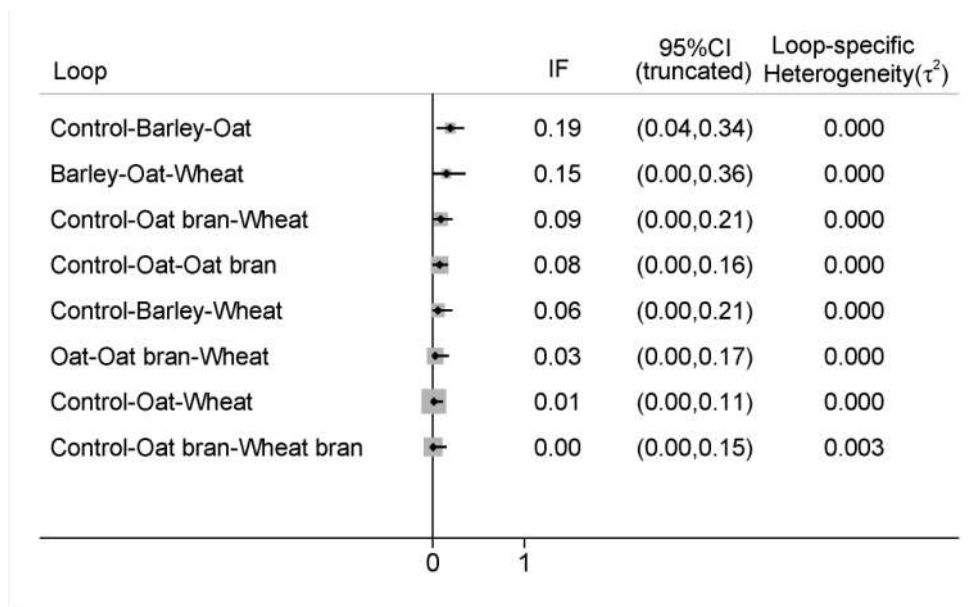

**Supplemental Table 33** Node-splitting method for assessment of inconsistency for HDL cholesterol

| Comparisons            | Direct      |           | Indirect    |           | Difference  |           | $P^a$ | tau       |
|------------------------|-------------|-----------|-------------|-----------|-------------|-----------|-------|-----------|
|                        | Coefficient | SE        | Coefficient | SE        | Coefficient | SE        |       |           |
| Control vs Barley      | -0.0456562  | 0.0272874 | 0.0692908   | 0.0573057 | -0.1149471  | 0.0634762 | 0.07  | 0.0378725 |
| Control vs Brown rice  | -           | -         | -           | -         | -           | -         | -     | -         |
| Control vs Oat         | 0.0116275   | 0.0137193 | -0.0244189  | 0.0407305 | 0.0360464   | 0.0428895 | 0.40  | 0.0389282 |
| Control vs Oat bran    | -0.0405477  | 0.0212707 | 0.0339962   | 0.0384744 | -0.0745439  | 0.0434447 | 0.09  | 0.0370801 |
| Control vs Wheat       | 0.0118313   | 0.0340556 | -0.0351742  | 0.0343347 | 0.0470055   | 0.048366  | 0.33  | 0.0395221 |
| Control vs Wheat bran  | -0.0932892  | 0.0576188 | -0.1025073  | 0.0346987 | 0.0092181   | 0.06724   | 0.89  | 0.0392321 |
| Barley vs Oat          | -1.23E-01   | 0.0763319 | 0.0550953   | 0.0286655 | -0.1776244  | 0.0815889 | 0.03  | 0.0372694 |
| Barley vs Wheat        | -4.48E-09   | 0.0811743 | 0.0148543   | 0.0363726 | -0.0148543  | 0.0889507 | 0.87  | 0.0393848 |
| Oat vs Oat bran        | -0.003186   | 0.0433185 | -0.0410133  | 0.0251536 | 0.0378273   | 0.0498378 | 0.45  | 0.0389449 |
| Oat vs Wheat           | -0.0233938  | 0.0457584 | -0.0176365  | 0.0307890 | -0.0057574  | 0.0551614 | 0.92  | 0.0396162 |
| Oat bran vs Wheat      | -0.0393309  | 0.0558842 | 0.0297233   | 0.0328201 | -0.0690542  | 0.0648094 | 0.29  | 0.0391678 |
| Oat bran vs Wheat bran | -0.0781303  | 0.0283321 | -0.0689122  | 0.0609849 | -0.0092182  | 0.0672695 | 0.89  | 0.0392321 |

<sup>a</sup> $P$  for assessment of inconsistency.  $P < 0.05$  was considered to indicate a significant inconsistency existed between direct and indirect evidence

**Supplemental Table 34** Comparative effects of different whole grains and brans on the control of HDL cholesterol<sup>a</sup>

|            | Control | Wheat bran          | Wheat              | Oat bran            | Oat                | Brown rice        | Barley             |
|------------|---------|---------------------|--------------------|---------------------|--------------------|-------------------|--------------------|
| Control    | -       | -0.12 (-0.19,-0.05) | -0.03 (-0.09,0.03) | -0.08 (-0.12,-0.03) | -0.01 (-0.04,0.03) | 0.03 (-0.05,0.11) | -0.02 (-0.09,0.05) |
| Wheat bran |         | -                   | 0.09 (0.00,0.18)   | 0.04 (-0.02,0.10)   | 0.11 (0.03,0.19)   | 0.15 (0.04,0.26)  | 0.10 (-0.00,0.20)  |
| Wheat      |         |                     | -                  | -0.05 (-0.12,0.02)  | 0.02 (-0.04,0.09)  | 0.06 (-0.05,0.16) | 0.01 (-0.08,0.10)  |
| Oat bran   |         |                     |                    | -                   | 0.07 (0.02,0.12)   | 0.11 (0.01,0.20)  | 0.06 (-0.02,0.14)  |
| Oat        |         |                     |                    |                     | -                  | 0.03 (-0.06,0.12) | -0.01 (-0.09,0.06) |
| Brown rice |         |                     |                    |                     |                    | -                 | -0.05 (-0.16,0.06) |
| Barley     |         |                     |                    |                     |                    |                   | -                  |

<sup>a</sup>Mean differences with 95% confidence intervals (column vs row). Mean differences lower than 0 indicate that the treatments specified in the row are more efficacious than those in the column

---

**Supplemental Table 35** Detailed ranking results of the comparative effects of different whole grains and brans on the control of HDL cholesterol. The larger the SUCRA value, the better the treatment. SUCRA, surface under the cumulative ranking curve

| Treatments | SUCRA (%) | MeanRank |
|------------|-----------|----------|
| Control    | 63.1      | 3.2      |
| Barley     | 37.0      | 4.8      |
| Brown rice | 91.1      | 1.5      |
| Oat        | 74.7      | 2.5      |
| Oat bran   | 34.6      | 4.9      |
| Wheat      | 49.0      | 4.1      |
| Wheat bran | 0.5       | 7.0      |

**Supplemental Table 36** Sensitivity analysis using an inconsistency model for HDL cholesterol<sup>a</sup>

|            | Control | Wheat bran        | Wheat             | Oat bran            | Oat                 | Brown rice        | Barley              |
|------------|---------|-------------------|-------------------|---------------------|---------------------|-------------------|---------------------|
| Control    | 56.4    | 0.04 (-0.06,0.14) | 0.02 (-0.01,0.05) | -0.19 (-0.35,-0.03) | -0.08 (-0.16,-0.00) | 0.04 (-0.02,0.10) | -0.05 (-0.10,0.01)  |
| Wheat bran |         | 12.9              | 0.11 (-0.02,0.23) | 0.02 (-0.12,0.16)   | 0.11 (-0.00,0.23)   | 0.13 (0.00,0.26)  | 0.05 (-0.08,0.17)   |
| Wheat      |         |                   | 68.6              | -0.08 (-0.19,0.02)  | 0.01 (-0.06,0.08)   | 0.03 (-0.06,0.12) | -0.06 (-0.14,0.03)  |
| Oat bran   |         |                   |                   | 18.2                | 0.09 (0.00,0.18)    | 0.11 (0.00,0.21)  | 0.02 (-0.07,0.12)   |
| Oat        |         |                   |                   |                     | 79.9                | 0.02 (-0.05,0.08) | -0.07 (-0.13,-0.01) |
| Brown rice |         |                   |                   |                     |                     | 87.0              | -0.08 (-0.17,-0.00) |
| Barley     |         |                   |                   |                     |                     |                   | 27.0                |

<sup>a</sup>Mean differences with 95% confidence intervals (row vs column). Mean differences lower than 0 indicate that the treatments specified in the row are more efficacious than those in the column. SUCRA values are given in the diagonal of parenthesis. The larger the SUCRA value, the better the treatment. SUCRA, surface under the cumulative ranking curve

**Supplemental Table 37** Sensitivity analysis based on the studies only included dyslipidemic participants for HDL cholesterol<sup>a</sup>

|            | Control | Wheat bran          | Wheat              | Oat bran           | Oat               | Brown rice        | Barley             |
|------------|---------|---------------------|--------------------|--------------------|-------------------|-------------------|--------------------|
| Control    | 65.3    | -0.13 (-0.19,-0.06) | -0.01 (-0.06,0.04) | -0.02 (-0.06,0.02) | 0.00 (-0.02,0.03) | 0.05 (-0.02,0.13) | -0.03 (-0.07,0.02) |
| Wheat bran |         | 0.2                 | 0.11 (0.03,0.19)   | 0.10 (0.04,0.16)   | 0.13 (0.06,0.20)  | 0.18 (0.08,0.28)  | 0.10 (0.02,0.18)   |
| Wheat      |         |                     | 49.2               | -0.01 (-0.07,0.05) | 0.02 (-0.04,0.07) | 0.07 (-0.03,0.16) | -0.01 (-0.08,0.05) |
| Oat bran   |         |                     |                    | 36.2               | 0.03 (-0.02,0.07) | 0.08 (-0.01,0.16) | -0.00 (-0.06,0.06) |
| Oat        |         |                     |                    |                    | 69.9              | 0.05 (-0.03,0.13) | -0.03 (-0.08,0.03) |
| Brown rice |         |                     |                    |                    |                   | 93.2              | -0.08 (-0.17,0.01) |
| Barley     |         |                     |                    |                    |                   |                   | 36.0               |

<sup>a</sup>Mean differences with 95% confidence intervals (row vs column). Mean differences lower than 0 indicate that the treatments specified in the row are more efficacious than those in the column. SUCRA values are given in the diagonal of parenthesis. The larger the SUCRA value, the better the treatment. SUCRA, surface under the cumulative ranking curve



**Supplemental Table 38** Sensitivity analysis based on the studies with parallel design for HDL cholesterol<sup>a</sup>

|            | Control | Wheat bran          | Wheat              | Oat bran            | Oat                | Brown rice        | Barley            |
|------------|---------|---------------------|--------------------|---------------------|--------------------|-------------------|-------------------|
| Control    | 62.7    | -0.14 (-0.24,-0.04) | -0.04 (-0.11,0.03) | -0.10 (-0.15,-0.04) | -0.00 (-0.05,0.04) | 0.05 (-0.05,0.15) | 0.11 (-0.08,0.30) |
| Wheat bran |         | 3.7                 | 0.10 (-0.02,0.22)  | 0.04 (-0.04,0.13)   | 0.14 (0.03,0.24)   | 0.19 (0.05,0.34)  | 0.25 (0.03,0.46)  |
| Wheat      |         |                     | 39.2               | -0.06 (-0.14,0.02)  | 0.04 (-0.05,0.12)  | 0.09 (-0.04,0.22) | 0.15 (-0.06,0.35) |
| Oat bran   |         |                     |                    | 16.3                | 0.09 (0.03,0.16)   | 0.15 (0.03,0.26)  | 0.20 (0.01,0.40)  |
| Oat        |         |                     |                    |                     | 58.9               | 0.05 (-0.06,0.17) | 0.11 (-0.08,0.30) |
| Brown rice |         |                     |                    |                     |                    | 80.4              | 0.06 (-0.16,0.27) |
| Barley     |         |                     |                    |                     |                    |                   | 88.8              |

<sup>a</sup>Mean differences with 95% confidence intervals (row vs column). Mean differences lower than 0 indicate that the treatments specified in the row are more efficacious than those in the column. SUCRA values are given in the diagonal of parenthesis. The larger the SUCRA value, the better the treatment. SUCRA, surface under the cumulative ranking curve

**Supplemental Table 39** Sensitivity analysis when removing the studies with cluster crossover design for HDL cholesterol<sup>a</sup>

|            | Control | Wheat bran          | Wheat              | Oat bran            | Oat                | Brown rice        | Barley             |
|------------|---------|---------------------|--------------------|---------------------|--------------------|-------------------|--------------------|
| Control    | 73.7    | -0.13 (-0.22,-0.05) | -0.03 (-0.09,0.03) | -0.08 (-0.13,-0.03) | -0.01 (-0.04,0.03) | 0.03 (-0.06,0.11) | -0.02 (-0.09,0.06) |
| Wheat bran |         | 2.3                 | 0.11 (0.00,0.21)   | 0.06 (-0.02,0.13)   | 0.13 (0.03,0.22)   | 0.16 (0.04,0.28)  | 0.12 (0.00,0.23)   |
| Wheat      |         |                     | 47.8               | -0.05 (-0.12,0.02)  | 0.02 (-0.05,0.09)  | 0.06 (-0.05,0.16) | 0.01 (-0.08,0.10)  |
| Oat bran   |         |                     |                    | 18.7                | 0.07 (0.02,0.13)   | 0.11 (0.01,0.20)  | 0.06 (-0.03,0.15)  |
| Oat        |         |                     |                    |                     | 65.2               | 0.03 (-0.06,0.13) | -0.01 (-0.09,0.07) |
| Brown rice |         |                     |                    |                     |                    | 85.5              | -0.05 (-0.16,0.07) |
| Barley     |         |                     |                    |                     |                    |                   | 56.7               |

<sup>a</sup>Mean differences with 95% confidence intervals (row vs column). Mean differences lower than 0 indicate that the treatments specified in the row are more efficacious than those in the column. SUCRA values are given in the diagonal of parenthesis. The larger the SUCRA value, the better the treatment. SUCRA, surface under the cumulative ranking curve

**Supplemental Table 40** Sensitivity analysis when excluding the trials with the duration less than 3 weeks for HDL cholesterol<sup>a</sup>

|            | Control | Wheat bran          | Wheat              | Oat bran            | Oat                | Brown rice        | Barley             |
|------------|---------|---------------------|--------------------|---------------------|--------------------|-------------------|--------------------|
| Control    | 72.8    | -0.13 (-0.21,-0.05) | -0.03 (-0.09,0.03) | -0.08 (-0.12,-0.03) | -0.01 (-0.04,0.03) | 0.03 (-0.06,0.11) | -0.02 (-0.09,0.05) |
| Wheat bran |         | 2.0                 | 0.10 (0.00,0.20)   | 0.05 (-0.02,0.12)   | 0.12 (0.04,0.21)   | 0.16 (0.04,0.27)  | 0.11 (0.00,0.22)   |
| Wheat      |         |                     | 49.6               | -0.05 (-0.12,0.02)  | 0.02 (-0.05,0.09)  | 0.06 (-0.05,0.16) | 0.01 (-0.08,0.10)  |
| Oat bran   |         |                     |                    | 18.6                | 0.07 (0.01,0.12)   | 0.10 (0.01,0.20)  | 0.06 (-0.03,0.14)  |
| Oat        |         |                     |                    |                     | 65.3               | 0.03 (-0.06,0.12) | -0.01 (-0.09,0.07) |
| Brown rice |         |                     |                    |                     |                    | 85.6              | -0.05 (-0.16,0.06) |
| Barley     |         |                     |                    |                     |                    |                   | 56.1               |

<sup>a</sup>Mean differences with 95% confidence intervals (row vs column). Mean differences lower than 0 indicate that the treatments specified in the row are more efficacious than those in the column. SUCRA values are given in the diagonal of parenthesis. The larger the SUCRA value, the better the treatment. SUCRA, surface under the cumulative ranking curve

**Supplemental Table 41** Sensitivity analysis when excluding the trials with the duration less than 4 weeks for HDL cholesterol<sup>a</sup>

|            | Control | Wheat bran          | Wheat              | Oat bran            | Oat                | Brown rice        | Barley             |
|------------|---------|---------------------|--------------------|---------------------|--------------------|-------------------|--------------------|
| Control    | 74.7    | -0.13 (-0.21,-0.05) | -0.03 (-0.10,0.03) | -0.08 (-0.13,-0.03) | -0.00 (-0.04,0.04) | 0.03 (-0.05,0.11) | -0.04 (-0.12,0.04) |
| Wheat bran |         | 2.9                 | 0.10 (-0.00,0.20)  | 0.05 (-0.02,0.12)   | 0.13 (0.04,0.22)   | 0.16 (0.04,0.27)  | 0.09 (-0.02,0.20)  |
| Wheat      |         |                     | 48.6               | -0.05 (-0.12,0.02)  | 0.03 (-0.04,0.10)  | 0.06 (-0.04,0.16) | -0.01 (-0.11,0.08) |
| Oat bran   |         |                     |                    | 21.2                | 0.08 (0.02,0.13)   | 0.11 (0.01,0.20)  | 0.04 (-0.06,0.13)  |
| Oat        |         |                     |                    |                     |                    | 0.03 (-0.06,0.12) | -0.04 (-0.13,0.05) |
| Brown rice |         |                     |                    |                     |                    | 87.0              | -0.07 (-0.19,0.04) |
| Barley     |         |                     |                    |                     |                    |                   | 43.0               |

<sup>a</sup>Mean differences with 95% confidence intervals (row vs column). Mean differences lower than 0 indicate that the treatments specified in the row are more efficacious than those in the column. SUCRA values are given in the diagonal of parenthesis. The larger the SUCRA value, the better the treatment. SUCRA, surface under the cumulative ranking curve

**Supplemental Table 42** Sensitivity analysis when excluding the trials with intervention duration of 16 weeks and 12 months for HDL cholesterol<sup>a</sup>

|            | Control | Wheat bran          | Wheat              | Oat bran            | Oat                | Brown rice        | Barley             |
|------------|---------|---------------------|--------------------|---------------------|--------------------|-------------------|--------------------|
| Control    | 76.3    | -0.13 (-0.21,-0.05) | -0.03 (-0.09,0.03) | -0.08 (-0.12,-0.03) | -0.01 (-0.04,0.03) | 0.01 (-0.09,0.10) | -0.02 (-0.09,0.06) |
| Wheat bran |         | 2.6                 | 0.10 (0.00,0.20)   | 0.05 (-0.02,0.12)   | 0.12 (0.04,0.21)   | 0.13 (0.01,0.26)  | 0.11 (0.00,0.22)   |
| Wheat      |         |                     | 50.8               | -0.05 (-0.12,0.02)  | 0.02 (-0.05,0.09)  | 0.03 (-0.08,0.15) | 0.01 (-0.08,0.10)  |
| Oat bran   |         |                     |                    | 19.3                | 0.07 (0.01,0.12)   | 0.08 (-0.02,0.19) | 0.06 (-0.03,0.14)  |
| Oat        |         |                     |                    |                     | 68.7               | 0.01 (-0.09,0.12) | -0.01 (-0.09,0.07) |
| Brown rice |         |                     |                    |                     |                    | 74.2              | -0.02 (-0.15,0.10) |
| Barley     |         |                     |                    |                     |                    |                   | 58.1               |

<sup>a</sup>Mean differences with 95% confidence intervals (row vs column). Mean differences lower than 0 indicate that the treatments specified in the row are more efficacious than those in the column. SUCRA values are given in the diagonal of parenthesis. The larger the SUCRA value, the better the treatment. SUCRA, surface under the cumulative ranking curve

**Supplemental Table 43** Sensitivity analysis based on the studies with low risk of bias for HDL cholesterol<sup>a</sup>

|            | Control | Wheat bran          | Wheat              | Oat bran           | Oat               | Brown rice        | Barley            |
|------------|---------|---------------------|--------------------|--------------------|-------------------|-------------------|-------------------|
| Control    | 48.9    | -0.10 (-0.17,-0.03) | -0.02 (-0.09,0.05) | -0.03 (-0.07,0.01) | 0.01 (-0.02,0.05) | 0.09 (-0.02,0.20) | 0.14 (-0.02,0.29) |
| Wheat bran |         | 1.0                 | 0.08 (-0.01,0.17)  | 0.07 (0.01,0.13)   | 0.11 (0.04,0.19)  | 0.19 (0.06,0.32)  | 0.23 (0.06,0.41)  |
| Wheat      |         |                     | 34.6               | -0.01 (-0.08,0.07) | 0.04 (-0.04,0.11) | 0.11 (-0.02,0.24) | 0.16 (-0.01,0.33) |
| Oat bran   |         |                     |                    | 26.6               | 0.04 (-0.01,0.09) | 0.12 (-0.00,0.24) | 0.16 (0.00,0.33)  |
| Oat        |         |                     |                    |                    | 62.2              | 0.08 (-0.04,0.19) | 0.12 (-0.03,0.28) |
| Brown rice |         |                     |                    |                    |                   | 84.7              | 0.05 (-0.15,0.24) |
| Barley     |         |                     |                    |                    |                   |                   | 92.0              |

<sup>a</sup>Mean differences with 95% confidence intervals (row vs column). Mean differences lower than 0 indicate that the treatments specified in the row are more efficacious than those in the column. SUCRA values are given in the diagonal of parenthesis. The larger the SUCRA value, the better the treatment. SUCRA, surface under the cumulative ranking curve

**Supplemental Table 44** Overall GRADE quality of evidence for HDL cholesterol from network meta-analysis<sup>a</sup>

| Comparisons           | Study limitations                                                       | Imprecision                   | Heterogeneity and Inconsistency                                                                                                                                                          | Indirectness                                                                                                | Publication bias                                                                                                                          | Confidence in MD for overall change in HDL                                                     |
|-----------------------|-------------------------------------------------------------------------|-------------------------------|------------------------------------------------------------------------------------------------------------------------------------------------------------------------------------------|-------------------------------------------------------------------------------------------------------------|-------------------------------------------------------------------------------------------------------------------------------------------|------------------------------------------------------------------------------------------------|
| Barley vs Control     | 100% of the estimate from studies at high risk, and 0% at moderate risk | MD -0.02, 95% CI (-0.09,0.05) | Mild heterogeneity according to $I^2$ (0%) and $P$ (1.00) in direct comparisons No inconsistency between the direct and indirect estimate (Node-split $P= 0.07$ and $tau= 0.04$ )        | The treatment effects were not significantly influenced by clinical modifiers in the subgroup analyses      | Undetectable by the routine method The comparison-adjusted funnel plot for the network is not suggestive of any dominant publication bias | Very Low (Downgrade by three levels due to study limitations (for two levels) and imprecision) |
| Brown rice vs Control | 80% of the estimate from studies at high risk, and 20% at moderate risk | MD 0.03, 95% CI (-0.05,0.11)  | Mild heterogeneity according to $I^2$ (0%) and $P$ ( 0.82) in direct comparisons Only direct comparisons and no node-splitting inconsistency                                             | The treatment effects were not significantly influenced by clinical modifiers in the subgroup analyses      | Undetectable by the routine method The comparison-adjusted funnel plot for the network is not suggestive of any dominant publication bias | Very Low (Downgrade by three levels due to study limitations (for two levels), imprecision)    |
| Oat vs Control        | 40% of the estimate from studies at high risk, and 60% at moderate risk | MD -0.01, 95% CI (-0.04,0.03) | Moderate heterogeneity according to $I^2$ (56.4%) and $P$ (0.08) in direct comparisons No inconsistency between the direct and indirect estimate (Node-split $P= 0.40$ and $tau= 0.04$ ) | The treatment effects were not significantly influenced by some clinical modifiers in the subgroup analyses | Undetectable by the routine method The comparison-adjusted funnel plot for the network is not suggestive of any dominant publication bias | Low (Downgrade by two levels due to study limitations and imprecision)                         |

Supplemental Table 44 Continued

| Comparisons           | Study limitations                                                       | Imprecision                    | Heterogeneity and Inconsistency                                                                                                                                                             | Indirectness                                                                                           | Publication bias                                                                                                                          | Confidence in MD for overall change in HDL                             |
|-----------------------|-------------------------------------------------------------------------|--------------------------------|---------------------------------------------------------------------------------------------------------------------------------------------------------------------------------------------|--------------------------------------------------------------------------------------------------------|-------------------------------------------------------------------------------------------------------------------------------------------|------------------------------------------------------------------------|
| Oat bran vs Control   | 0% of the estimate from studies at high risk, and 100% at moderate risk | MD -0.08, 95% CI (-0.12,-0.03) | Moderate heterogeneity according to $I^2$ (65.5%) and $P$ (< 0.01) in direct comparisons No inconsistency between the direct and indirect estimate (Node-split $P= 0.09$ and $\tau= 0.04$ ) | The treatment effects were significantly influenced by clinical modifiers in the subgroup analyses     | Undetectable by the routine method The comparison-adjusted funnel plot for the network is not suggestive of any dominant publication bias | Moderate (Downgrade by one level due to Indirectness)                  |
| Wheat vs Control      | 50% of the estimate from studies at high risk, and 25% at moderate risk | MD -0.03, 95% CI (-0.09,0.03)  | Mild heterogeneity according to $I^2$ (0%) and $P$ (0.91) in direct comparisons No inconsistency between the direct and indirect estimate (Node-split $P= 0.33$ and $\tau= 0.04$ )          | The treatment effects were not significantly influenced by clinical modifiers in the subgroup analyses | Undetectable by the routine method The comparison-adjusted funnel plot for the network is not suggestive of any dominant publication bias | Low (Downgrade by two levels due to study limitations and imprecision) |
| Wheat bran vs Control | 50% of the estimate from studies at high risk, and 50% at moderate risk | MD -0.12, 95% CI (-0.19,-0.05) | Mild heterogeneity according to $I^2$ (0%) and $P$ (0.82) in direct comparisons No inconsistency between the direct and indirect estimate (Node-split $P= 0.89$ and $\tau= 0.04$ )          | The treatment effects were not significantly influenced by clinical modifiers in the subgroup analyses | Undetectable by the routine method The comparison-adjusted funnel plot for the network is not suggestive of any dominant publication bias | Moderate (Downgrade by one level due to study limitations)             |



Supplemental Table 44 Continued

| Comparisons     | Study limitations                                                       | Imprecision                   | Heterogeneity and Inconsistency                                                                                                                                                      | Indirectness                                                                                           | Publication bias                                                                                                                          | Confidence in MD for overall change in HDL            |
|-----------------|-------------------------------------------------------------------------|-------------------------------|--------------------------------------------------------------------------------------------------------------------------------------------------------------------------------------|--------------------------------------------------------------------------------------------------------|-------------------------------------------------------------------------------------------------------------------------------------------|-------------------------------------------------------|
| Barley vs Oat   | 0% of the estimate from studies at high risk, and 100% at moderate risk | MD -0.01, 95% CI (-0.09,0.06) | Low heterogeneity according to $I^2$ (41.4%) and $P$ (0.27) in direct comparisons No inconsistency between the direct and indirect estimate (Node-split $P= 0.03$ and $\tau= 0.04$ ) | The treatment effects were not significantly influenced by clinical modifiers in the subgroup analyses | Undetectable by the routine method The comparison-adjusted funnel plot for the network is not suggestive of any dominant publication bias | Moderate (Downgrade by one level due to imprecision)  |
| Barley vs Wheat | 0% of the estimate from studies at high risk, and 100% at moderate risk | MD 0.01, 95% CI (-0.08,0.10)  | Only one head-to-head study, and no heterogeneity No inconsistency between the direct and indirect estimate (Node-split $P= 0.87$ and $\tau= 0.04$ )                                 | The treatment effects were not significantly influenced by clinical modifiers in the subgroup analyses | Undetectable by the routine method The comparison-adjusted funnel plot for the network is not suggestive of any dominant publication bias | Moderate (Downgrade by one level due to imprecision)  |
| Oat vs Oat bran | 0% of the estimate from studies at high risk, and 100% at moderate risk | MD 0.07, 95% CI (0.02,0.12)   | Mild heterogeneity according to $I^2$ (0%) and $P$ (0.98) in direct comparisons No inconsistency between the direct and indirect estimate (Node-split $P= 0.45$ and $\tau= 0.04$ )   | The treatment effects were significantly influenced by clinical modifiers in the subgroup analyses     | Undetectable by the routine method The comparison-adjusted funnel plot for the network is not suggestive of any dominant publication bias | Moderate (Downgrade by one level due to Indirectness) |

Supplemental Table 44 Continued

| Comparisons            | Study limitations                                                       | Imprecision                   | Heterogeneity and Inconsistency                                                                                                                                                       | Indirectness                                                                                           | Publication bias                                                                                                                          | Confidence in MD for overall change in HDL                                           |
|------------------------|-------------------------------------------------------------------------|-------------------------------|---------------------------------------------------------------------------------------------------------------------------------------------------------------------------------------|--------------------------------------------------------------------------------------------------------|-------------------------------------------------------------------------------------------------------------------------------------------|--------------------------------------------------------------------------------------|
| Oat vs Wheat           | 0% of the estimate from studies at high risk, and 100% at moderate risk | MD 0.02, 95% CI (-0.04,0.09)  | Mild heterogeneity according to $I^2$ (0%) and $P$ (0.90) in direct comparisons No inconsistency between the direct and indirect estimate (Node-split $P=0.92$ and $\tau=0.04$ )      | The treatment effects were not significantly influenced by clinical modifiers in the subgroup analyses | Undetectable by the routine method The comparison-adjusted funnel plot for the network is not suggestive of any dominant publication bias | Moderate (Downgrade by one level due to imprecision)                                 |
| Oat bran vs Wheat      | 0% of the estimate from studies at high risk, and 50% at moderate risk  | MD -0.05, 95% CI (-0.12,0.02) | Mild heterogeneity according to $I^2$ (0%) and $P$ (0.97) in direct comparisons No inconsistency between the direct and indirect estimate (Node-split $P=0.29$ and $\tau=0.04$ )      | The treatment effects were not significantly influenced by clinical modifiers in the subgroup analyses | Undetectable by the routine method The comparison-adjusted funnel plot for the network is not suggestive of any dominant publication bias | Moderate (Downgrade by one level due to imprecision)                                 |
| Oat bran vs Wheat bran | 0% of the estimate from studies at high risk, and 100% at moderate risk | MD 0.04, 95% CI (-0.02,0.10)  | High heterogeneity according to $I^2$ (88.0%) and $P$ (< 0.01) in direct comparisons No inconsistency between the direct and indirect estimate (Node-split $P=0.89$ and $\tau=0.04$ ) | The treatment effects were not significantly influenced by clinical modifiers in the subgroup analyses | Undetectable by the routine method The comparison-adjusted funnel plot for the network is not suggestive of any dominant publication bias | Low (Downgrade by two levels due to imprecision and Heterogeneity and Inconsistency) |

<sup>a</sup>The quality of evidence of network estimates for all outcomes by using the GRADE framework, which characterizes the quality of a body of evidence on the basis of the study limitations, imprecision, inconsistency, indirectness, and publication bias.

**Supplemental Fig. 9** Pairwise meta-analysis of triglycerides. The square represents the overall estimated effects, and the results were obtained from a random-effects model. MD lower than 0 indicate that the former treatment is more efficacious than latter. MD, mean differences

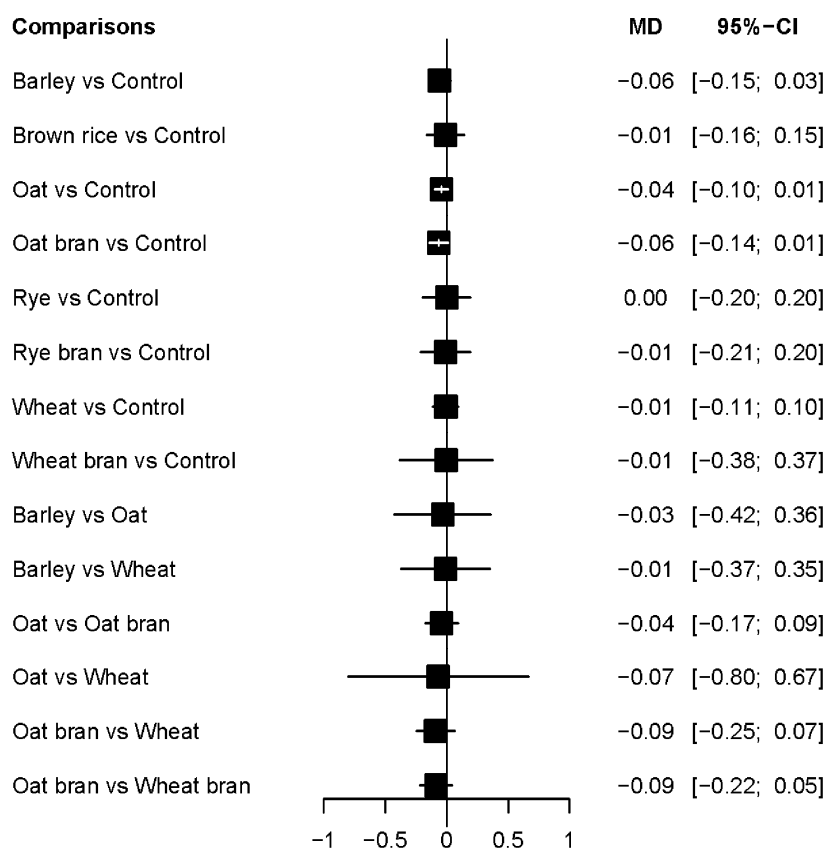

**Supplemental Table 45** Pairwise meta-analysis results for triglycerides

| Comparisons            | No. of comparisons | Mean differences      |                       |          |                       |                                      |
|------------------------|--------------------|-----------------------|-----------------------|----------|-----------------------|--------------------------------------|
|                        |                    | (95% CI) <sup>a</sup> | <i>I</i> <sup>2</sup> | $\tau^2$ | <i>P</i> <sup>b</sup> | <i>P</i> <sup>c</sup> (Egger's test) |
| Barley vs Control      | 5                  | -0.06 (-0.15, 0.03)   | 27.2%                 | 0.00     | 0.24                  | 0.02                                 |
| Brown rice vs Control  | 8                  | -0.01 (-0.16, 0.15)   | 0%                    | 0.00     | 0.62                  | 0.50                                 |
| Oat vs Control         | 27                 | -0.04 (-0.10, 0.01)   | 42.1%                 | 0.00     | 0.01                  | 0.04                                 |
| Oat bran vs Control    | 20                 | -0.06 (-0.14, 0.01)   | 0%                    | 0.00     | 0.95                  | 0.32                                 |
| Rye vs Control         | 2                  | 0.00 (-0.20, 0.20)    | 0%                    | 0.00     | 0.33                  | -                                    |
| Rye bran vs Control    | 1                  | -0.01 (-0.21, 0.20)   | -                     | -        | -                     | -                                    |
| Wheat vs Control       | 6                  | -0.01 (-0.11, 0.10)   | 0%                    | 0.00     | 0.99                  | 0.51                                 |
| Wheat bran vs Control  | 5                  | -0.01 (-0.38, 0.37)   | 0%                    | 0.00     | 0.35                  | 0.62                                 |
| Barley vs Oat          | 2                  | -0.03 (-0.42, 0.36)   | 0%                    | 0.00     | 0.52                  | -                                    |
| Barley vs Wheat        | 1                  | -0.01 (-0.37, 0.35)   | -                     | -        | -                     | -                                    |
| Oat vs Oat bran        | 9                  | -0.04 (-0.17, 0.09)   | 0%                    | 0.00     | 0.09                  | 0.37                                 |
| Oat vs Wheat           | 2                  | -0.07 (-0.80, 0.67)   | 77.6%                 | 0.23     | 0.03                  | -                                    |
| Oat bran vs Wheat      | 4                  | -0.09 (-0.25, 0.07)   | 0%                    | 0.00     | 0.46                  | -                                    |
| Oat bran vs Wheat bran | 10                 | -0.09 (-0.22, 0.05)   | 57.7%                 | 0.02     | 0.01                  | 0.21                                 |

<sup>a</sup>Mean differences lower than 0 indicate that the former treatment is more efficacious than latter

<sup>b</sup>*P* for the heterogeneity of pairwise meta-analysis. Heterogeneity was assessed by using Cochran's test, and *P* < 0.05 was considered to indicate significant heterogeneity across studies

<sup>c</sup>*P* for Egger's test. *P* < 0.05 was considered to indicate a significant small-study effects

**Supplemental Table 46** Contribution of direct evidence to the network for triglycerides

| Comparisons            | No. of comparisons | Contribution to the network (%) |
|------------------------|--------------------|---------------------------------|
| Control vs Barley      | 5                  | 13.3                            |
| Control vs Brown rice  | 8                  | 14.3                            |
| Control vs Oat         | 27                 | 14.8                            |
| Control vs Oat bran    | 20                 | 15.8                            |
| Control vs Wheat       | 6                  | 11.1                            |
| Control vs Wheat bran  | 5                  | 2.2                             |
| Barley vs Oat          | 2                  | 1.0                             |
| Barley vs Wheat        | 1                  | 1.6                             |
| Oat vs Oat bran        | 9                  | 6.3                             |
| Oat vs Wheat           | 2                  | 0.3                             |
| Oat bran vs Wheat      | 4                  | 6.5                             |
| Oat bran vs Wheat bran | 10                 | 12.8                            |

**Supplemental Fig. 10** Evaluation of inconsistency by using loop-specific approach for triglycerides. IFs along with their confidence intervals are displayed. IFs are calculated as the absolute difference between direct and indirect estimates and therefore confidence intervals are truncated to 0. Loops that their lower CI limit does not reach the 0 line are considered to present statistically significant inconsistency. IF, inconsistency factor

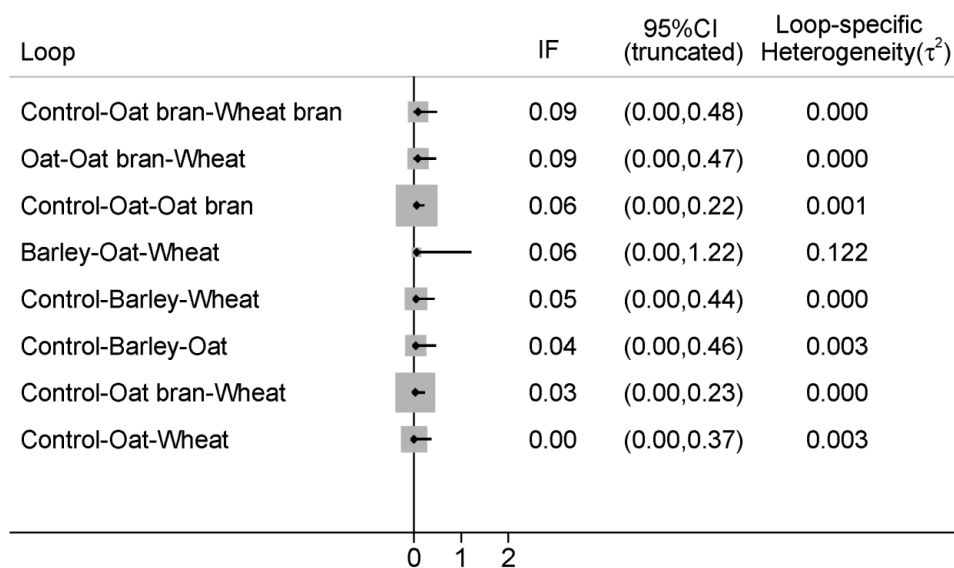

**Supplemental Table 47** Node-splitting method for assessment of inconsistency for triglycerides

| Comparisons            | Direct      |           | Indirect    |           | Difference  |           | $P^a$ | tau       |
|------------------------|-------------|-----------|-------------|-----------|-------------|-----------|-------|-----------|
|                        | Coefficient | SE        | Coefficient | SE        | Coefficient | SE        |       |           |
| Control vs Barley      | -0.0416445  | 0.05738   | -0.0503133  | 0.1463491 | 0.0086688   | 0.1573788 | 0.96  | 0.0697359 |
| Control vs Brown rice  | -           | -         | -           | -         | -           | -         | -     | -         |
| Control vs Oat         | -0.0586073  | 0.0295816 | -0.0626302  | 0.1070164 | 0.0040229   | 0.1121942 | 0.97  | 0.0696149 |
| Control vs Oat bran    | -0.0693588  | 0.0456356 | -0.0426665  | 0.0800254 | -0.0266923  | 0.0936898 | 0.78  | 0.0704432 |
| Control vs Wheat       | -0.0074508  | 0.0604894 | 0.004879    | 0.0816147 | -0.0123298  | 0.1015761 | 0.90  | 0.0700041 |
| Control vs Wheat bran  | -0.0046729  | 0.1989407 | 0.0542954   | 0.0670452 | -0.0589683  | 0.209962  | 0.78  | 0.0687131 |
| Barley vs Oat          | 0.0309012   | 0.206401  | -0.0201972  | 0.0625755 | 0.0510984   | 0.2155826 | 0.81  | 0.0695311 |
| Barley vs Wheat        | 1.00E-02    | 0.1987217 | 0.0439371   | 0.0745038 | -0.0339372  | 0.212229  | 0.87  | 0.0694869 |
| Oat vs Oat bran        | 0.0399333   | 0.0717384 | -0.029224   | 0.0549041 | 0.0691573   | 0.0899732 | 0.44  | 0.0687797 |
| Oat vs Wheat           | 0.0448044   | 0.1720902 | 0.0570593   | 0.0568779 | -0.0122549  | 0.1812266 | 0.95  | 0.0693659 |
| Oat bran vs Wheat      | 0.079784    | 0.093514  | 0.048556    | 0.0686998 | 0.031228    | 0.1161036 | 0.79  | 0.069841  |
| Oat bran vs Wheat bran | 0.1147561   | 0.0539588 | 0.0557898   | 0.2028179 | 0.0589663   | 0.2099612 | 0.78  | 0.0687131 |

<sup>a</sup> $P$  for assessment of inconsistency.  $P < 0.05$  was considered to indicate a significant inconsistency existed between direct and indirect evidence

**Supplemental Table 48** Comparative effects of different whole grains and brans on the control of triglycerides<sup>a</sup>

|            | Control | Wheat bran        | Wheat              | Oat bran            | Oat                 | Brown rice         | Barley             |
|------------|---------|-------------------|--------------------|---------------------|---------------------|--------------------|--------------------|
| Control    | -       | 0.05 (-0.08,0.17) | -0.00 (-0.10,0.09) | -0.06 (-0.14,0.01)  | -0.06 (-0.11,-0.00) | 0.01 (-0.17,0.18)  | -0.04 (-0.15,0.06) |
| Wheat bran |         | -                 | -0.05 (-0.20,0.10) | -0.11 (-0.21,-0.01) | -0.11 (-0.24,0.02)  | -0.04 (-0.26,0.17) | -0.09 (-0.26,0.07) |
| Wheat      |         |                   | -                  | -0.06 (-0.17,0.05)  | -0.06 (-0.16,0.05)  | 0.01 (-0.19,0.20)  | -0.04 (-0.18,0.10) |
| Oat bran   |         |                   |                    | -                   | 0.00 (-0.08,0.09)   | 0.07 (-0.12,0.26)  | 0.02 (-0.11,0.15)  |
| Oat        |         |                   |                    |                     | -                   | 0.06 (-0.12,0.24)  | 0.02 (-0.10,0.13)  |
| Brown rice |         |                   |                    |                     |                     | -                  | -0.05 (-0.25,0.15) |
| Barley     |         |                   |                    |                     |                     |                    | -                  |

<sup>a</sup>Mean differences with 95% confidence intervals (column vs row). Mean differences lower than 0 indicate that the treatments specified in the row are more efficacious than those in the column



---

**Supplemental Table 49** Detailed ranking results of the comparative effects of different whole grains and brans on the control of triglycerides. The larger the SUCRA value, the better the treatment. SUCRA, surface under the cumulative ranking curve

| Treatments | SUCRA (%) | MeanRank |
|------------|-----------|----------|
| Control    | 34.0      | 5.0      |
| Barley     | 64.4      | 3.1      |
| Brown rice | 40.7      | 4.6      |
| Oat        | 76.2      | 2.4      |
| Oat bran   | 78.0      | 2.3      |
| Wheat      | 39.7      | 4.6      |
| Wheat bran | 17.0      | 6.0      |

**Supplemental Table 50** Sensitivity analysis using an inconsistency model for triglycerides<sup>a</sup>

|            | Control | Wheat bran        | Wheat              | Oat bran           | Oat                | Brown rice        | Barley             |
|------------|---------|-------------------|--------------------|--------------------|--------------------|-------------------|--------------------|
| Control    | 32.2    | 0.03 (-0.17,0.23) | -0.05 (-0.11,0.02) | 0.04 (-0.39,0.46)  | -0.09 (-0.26,0.09) | 0.01 (-0.17,0.18) | -0.04 (-0.15,0.07) |
| Wheat bran |         | 45.3              | -0.00 (-0.41,0.41) | -0.09 (-0.52,0.34) | -0.04 (-0.44,0.35) | 0.01 (-0.42,0.44) | -0.04 (-0.44,0.37) |
| Wheat      |         |                   | 40.5               | -0.09 (-0.30,0.12) | -0.04 (-0.18,0.10) | 0.01 (-0.20,0.22) | -0.03 (-0.20,0.13) |
| Oat bran   |         |                   |                    | 75.4               | 0.05 (-0.13,0.23)  | 0.10 (-0.14,0.34) | 0.06 (-0.15,0.26)  |
| Oat        |         |                   |                    |                    | 63.3               | 0.05 (-0.13,0.24) | 0.01 (-0.12,0.14)  |
| Brown rice |         |                   |                    |                    |                    | 36.9              | -0.05 (-0.25,0.16) |
| Barley     |         |                   |                    |                    |                    |                   | 56.4               |

<sup>a</sup>Mean differences with 95% confidence intervals (row vs column). Mean differences lower than 0 indicate that the treatments specified in the row are more efficacious than those in the column. SUCRA values are given in the diagonal of parenthesis. The larger the SUCRA value, the better the treatment. SUCRA, surface under the cumulative ranking curve

**Supplemental Table 51** Sensitivity analysis based on the studies only included dyslipidemic participants for triglycerides<sup>a</sup>

|            | Control | Wheat bran        | Wheat              | Oat bran            | Oat                | Brown rice         | Barley             |
|------------|---------|-------------------|--------------------|---------------------|--------------------|--------------------|--------------------|
| Control    | 36.4    | 0.06 (-0.09,0.20) | -0.02 (-0.15,0.10) | -0.06 (-0.15,0.04)  | -0.06 (-0.13,0.00) | -0.09 (-0.30,0.13) | 0.04 (-0.13,0.20)  |
| Wheat bran |         | 17.7              | -0.08 (-0.26,0.10) | -0.11 (-0.22,-0.00) | -0.12 (-0.26,0.03) | -0.14 (-0.40,0.12) | -0.02 (-0.23,0.19) |
| Wheat      |         |                   | 50.7               | -0.03 (-0.18,0.11)  | -0.04 (-0.17,0.10) | -0.06 (-0.32,0.19) | 0.06 (-0.13,0.25)  |
| Oat bran   |         |                   |                    | 70.9                | -0.00 (-0.11,0.10) | -0.03 (-0.27,0.21) | 0.09 (-0.09,0.27)  |
| Oat        |         |                   |                    |                     | 74.8               | -0.03 (-0.25,0.20) | 0.10 (-0.07,0.27)  |
| Brown rice |         |                   |                    |                     |                    | 72.1               | 0.12 (-0.15,0.39)  |
| Barley     |         |                   |                    |                     |                    |                    | 27.5               |

<sup>a</sup>Mean differences with 95% confidence intervals (row vs column). Mean differences lower than 0 indicate that the treatments specified in the row are more efficacious than those in the column. SUCRA values are given in the diagonal of parenthesis. The larger the SUCRA value, the better the treatment. SUCRA, surface under the cumulative ranking curve

**Supplemental Table 52** Sensitivity analysis based on the studies with parallel design for triglycerides<sup>a</sup>

|            | Control | Wheat bran        | Wheat              | Oat bran            | Oat                 | Brown rice         | Barley             |
|------------|---------|-------------------|--------------------|---------------------|---------------------|--------------------|--------------------|
| Control    | 44.4    | 0.10 (-0.04,0.23) | 0.03 (-0.08,0.14)  | -0.04 (-0.12,0.05)  | -0.05 (-0.11,0.00)  | -0.01 (-0.20,0.17) | -0.08 (-0.49,0.33) |
| Wheat bran |         | 11.7              | -0.07 (-0.23,0.09) | -0.13 (-0.24,-0.03) | -0.15 (-0.29,-0.01) | -0.11 (-0.34,0.12) | -0.18 (-0.61,0.25) |
| Wheat      |         |                   | 32.3               | -0.07 (-0.18,0.05)  | -0.08 (-0.20,0.04)  | -0.04 (-0.25,0.17) | -0.11 (-0.53,0.31) |
| Oat bran   |         |                   |                    | 67.7                | -0.01 (-0.11,0.08)  | 0.03 (-0.18,0.23)  | -0.05 (-0.46,0.37) |
| Oat        |         |                   |                    |                     | 76.4                | 0.04 (-0.15,0.23)  | -0.03 (-0.43,0.37) |
| Brown rice |         |                   |                    |                     |                     | 52.1               | -0.07 (-0.52,0.38) |
| Barley     |         |                   |                    |                     |                     |                    | 65.3               |

<sup>a</sup>Mean differences with 95% confidence intervals (row vs column). Mean differences lower than 0 indicate that the treatments specified in the row are more efficacious than those in the column. SUCRA values are given in the diagonal of parenthesis. The larger the SUCRA value, the better the treatment. SUCRA, surface under the cumulative ranking curve

**Supplemental Table 53** Sensitivity analysis when removing the studies with cluster crossover design for triglycerides<sup>a</sup>

|            | Control | Wheat bran        | Wheat              | Oat bran            | Oat                 | Brown rice         | Barley             |
|------------|---------|-------------------|--------------------|---------------------|---------------------|--------------------|--------------------|
| Control    | 34.2    | 0.05 (-0.08,0.17) | -0.00 (-0.10,0.09) | -0.07 (-0.14,0.01)  | -0.06 (-0.11,-0.00) | 0.01 (-0.17,0.18)  | -0.04 (-0.15,0.06) |
| Wheat bran |         | 17.9              | -0.05 (-0.20,0.10) | -0.11 (-0.21,-0.01) | -0.11 (-0.24,0.03)  | -0.04 (-0.25,0.17) | -0.09 (-0.25,0.08) |
| Wheat      |         |                   | 39.1               | -0.06 (-0.17,0.05)  | -0.06 (-0.16,0.05)  | 0.01 (-0.19,0.21)  | -0.04 (-0.18,0.10) |
| Oat bran   |         |                   |                    | 79.5                | 0.01 (-0.08,0.09)   | 0.07 (-0.12,0.26)  | 0.02 (-0.11,0.15)  |
| Oat        |         |                   |                    |                     | 76.5                | 0.06 (-0.12,0.25)  | 0.02 (-0.10,0.13)  |
| Brown rice |         |                   |                    |                     |                     | 39.5               | -0.05 (-0.25,0.15) |
| Barley     |         |                   |                    |                     |                     |                    | 63.1               |

<sup>a</sup>Mean differences with 95% confidence intervals (row vs column). Mean differences lower than 0 indicate that the treatments specified in the row are more efficacious than those in the column. SUCRA values are given in the diagonal of parenthesis. The larger the SUCRA value, the better the treatment. SUCRA, surface under the cumulative ranking curve

**Supplemental Table 54** Sensitivity analysis when excluding the trials with the duration less than 3 weeks for triglycerides<sup>a</sup>

|            | Control | Wheat bran        | Wheat              | Oat bran            | Oat                 | Brown rice         | Barley             |
|------------|---------|-------------------|--------------------|---------------------|---------------------|--------------------|--------------------|
| Control    | 36.6    | 0.10 (-0.04,0.24) | -0.00 (-0.10,0.09) | -0.06 (-0.14,0.02)  | -0.06 (-0.11,-0.00) | 0.00 (-0.17,0.17)  | -0.05 (-0.15,0.06) |
| Wheat bran |         | 8.1               | -0.10 (-0.26,0.06) | -0.16 (-0.28,-0.04) | -0.16 (-0.30,-0.01) | -0.10 (-0.32,0.13) | -0.14 (-0.32,0.03) |
| Wheat      |         |                   | 41.2               | -0.06 (-0.17,0.05)  | -0.06 (-0.16,0.05)  | 0.01 (-0.19,0.20)  | -0.04 (-0.18,0.09) |
| Oat bran   |         |                   |                    | 77.2                | 0.00 (-0.09,0.09)   | 0.06 (-0.12,0.25)  | 0.01 (-0.11,0.14)  |
| Oat        |         |                   |                    |                     | 77.0                | 0.06 (-0.12,0.24)  | 0.01 (-0.10,0.13)  |
| Brown rice |         |                   |                    |                     |                     | 43.6               | -0.05 (-0.24,0.15) |
| Barley     |         |                   |                    |                     |                     |                    | 66.3               |

<sup>a</sup>Mean differences with 95% confidence intervals (row vs column). Mean differences lower than 0 indicate that the treatments specified in the row are more efficacious than those in the column. SUCRA values are given in the diagonal of parenthesis. The larger the SUCRA value, the better the treatment. SUCRA, surface under the cumulative ranking curve

**Supplemental Table 55** Sensitivity analysis when excluding the trials with the duration less than 4 weeks for triglycerides<sup>a</sup>

|            | Control | Wheat bran        | Wheat              | Oat bran            | Oat                 | Brown rice         | Barley             |
|------------|---------|-------------------|--------------------|---------------------|---------------------|--------------------|--------------------|
| Control    | 37.8    | 0.10 (-0.05,0.24) | 0.00 (-0.10,0.10)  | -0.06 (-0.14,0.02)  | -0.06 (-0.11,-0.00) | 0.00 (-0.17,0.18)  | -0.04 (-0.15,0.07) |
| Wheat bran |         | 8.5               | -0.09 (-0.26,0.07) | -0.16 (-0.28,-0.03) | -0.15 (-0.30,-0.01) | -0.09 (-0.32,0.13) | -0.14 (-0.32,0.05) |
| Wheat      |         |                   | 40.2               | -0.06 (-0.17,0.05)  | -0.06 (-0.17,0.05)  | 0.00 (-0.20,0.20)  | -0.04 (-0.19,0.10) |
| Oat bran   |         |                   |                    | 77.0                | 0.00 (-0.09,0.09)   | 0.06 (-0.13,0.25)  | 0.02 (-0.12,0.15)  |
| Oat        |         |                   |                    |                     | 77.9                | 0.06 (-0.12,0.24)  | 0.02 (-0.11,0.14)  |
| Brown rice |         |                   |                    |                     |                     | 44.2               | -0.04 (-0.24,0.16) |
| Barley     |         |                   |                    |                     |                     |                    | 64.5               |

<sup>a</sup>Mean differences with 95% confidence intervals (row vs column). Mean differences lower than 0 indicate that the treatments specified in the row are more efficacious than those in the column. SUCRA values are given in the diagonal of parenthesis. The larger the SUCRA value, the better the treatment. SUCRA, surface under the cumulative ranking curve

**Supplemental Table 56** Sensitivity analysis when excluding the trials with intervention duration of 16 weeks and 12 months for triglycerides<sup>a</sup>

|            | Control | Wheat bran        | Wheat              | Oat bran            | Oat                 | Brown rice        | Barley             |
|------------|---------|-------------------|--------------------|---------------------|---------------------|-------------------|--------------------|
| Control    | 38.9    | 0.04 (-0.09,0.17) | -0.00 (-0.10,0.09) | -0.07 (-0.14,0.01)  | -0.06 (-0.11,-0.00) | 0.11 (-0.12,0.34) | -0.04 (-0.15,0.06) |
| Wheat bran |         | 24.0              | -0.05 (-0.19,0.10) | -0.11 (-0.21,-0.00) | -0.10 (-0.23,0.03)  | 0.07 (-0.20,0.33) | -0.09 (-0.25,0.08) |
| Wheat      |         |                   | 44.4               | -0.06 (-0.17,0.05)  | -0.06 (-0.16,0.05)  | 0.11 (-0.14,0.36) | -0.04 (-0.18,0.10) |
| Oat bran   |         |                   |                    | 81.6                | 0.01 (-0.08,0.09)   | 0.17 (-0.07,0.42) | 0.02 (-0.11,0.15)  |
| Oat        |         |                   |                    |                     | 78.4                | 0.17 (-0.07,0.41) | 0.02 (-0.10,0.13)  |
| Brown rice |         |                   |                    |                     |                     | 15.9              | -0.15 (-0.41,0.10) |
| Barley     |         |                   |                    |                     |                     |                   | 66.8               |

<sup>a</sup>Mean differences with 95% confidence intervals (row vs column). Mean differences lower than 0 indicate that the treatments specified in the row are more efficacious than those in the column. SUCRA values are given in the diagonal of parenthesis. The larger the SUCRA value, the better the treatment. SUCRA, surface under the cumulative ranking curve



**Supplemental Table 57** Sensitivity analysis based on the studies with low risk of bias for triglycerides<sup>a</sup>

|            | Control | Wheat bran        | Wheat              | Oat bran            | Oat                 | Brown rice         | Barley             |
|------------|---------|-------------------|--------------------|---------------------|---------------------|--------------------|--------------------|
| Control    | 34.5    | 0.06 (-0.07,0.19) | 0.04 (-0.08,0.16)  | -0.06 (-0.14,0.02)  | -0.09 (-0.16,-0.03) | -0.12 (-0.37,0.13) | -0.12 (-0.53,0.28) |
| Wheat bran |         | 14.4              | -0.02 (-0.18,0.14) | -0.12 (-0.23,-0.02) | -0.15 (-0.29,-0.02) | -0.18 (-0.46,0.10) | -0.18 (-0.61,0.24) |
| Wheat      |         |                   | 22.4               | -0.10 (-0.22,0.02)  | -0.13 (-0.26,0.00)  | -0.16 (-0.43,0.12) | -0.16 (-0.58,0.26) |
| Oat bran   |         |                   |                    | 63.9                | -0.03 (-0.12,0.06)  | -0.06 (-0.32,0.20) | -0.06 (-0.48,0.35) |
| Oat        |         |                   |                    |                     | 75.7                | -0.03 (-0.28,0.23) | -0.03 (-0.43,0.37) |
| Brown rice |         |                   |                    |                     |                     | 72.9               | -0.00 (-0.48,0.47) |
| Barley     |         |                   |                    |                     |                     |                    | 66.1               |

<sup>a</sup>Mean differences with 95% confidence intervals (row vs column). Mean differences lower than 0 indicate that the treatments specified in the row are more efficacious than those in the column. SUCRA values are given in the diagonal of parenthesis. The larger the SUCRA value, the better the treatment. SUCRA, surface under the cumulative ranking curve

**Supplemental Table 58** Overall GRADE quality of evidence for triglycerides from network meta-analysis<sup>a</sup>

| Comparisons           | Study limitations                                                           | Imprecision                   | Heterogeneity and Inconsistency                                                                                                                                                      | Indirectness                                                                                           | Publication bias                                                                                                                          | Confidence in MD for overall change in TG                                                      |
|-----------------------|-----------------------------------------------------------------------------|-------------------------------|--------------------------------------------------------------------------------------------------------------------------------------------------------------------------------------|--------------------------------------------------------------------------------------------------------|-------------------------------------------------------------------------------------------------------------------------------------------|------------------------------------------------------------------------------------------------|
| Barley vs Control     | 100% of the estimate from studies at high risk, and 0% at moderate risk     | MD -0.02, 95% CI (-0.09,0.05) | Low heterogeneity according to $I^2$ (27.2%) and $P$ (0.36) in direct comparisons No inconsistency between the direct and indirect estimate (Node-split $P= 0.96$ and $\tau= 0.07$ ) | The treatment effects were not significantly influenced by clinical modifiers in the subgroup analyses | Undetectable by the routine method The comparison-adjusted funnel plot for the network is not suggestive of any dominant publication bias | Very Low (Downgrade by three levels due to study limitations (for two levels) and imprecision) |
| Brown rice vs Control | 100% of the estimate from studies at high risk, and 0% at moderate risk     | MD 0.03, 95% CI (-0.05,0.11)  | Mild heterogeneity according to $I^2$ (0%) and $P$ (0.60) in direct comparisons Only direct comparisons and no node-splitting inconsistency                                          | The treatment effects were not significantly influenced by clinical modifiers in the subgroup analyses | Undetectable by the routine method The comparison-adjusted funnel plot for the network is not suggestive of any dominant publication bias | Very Low (Downgrade by three levels due to study limitations (for two levels), imprecision)    |
| Oat vs Control        | 27.2% of the estimate from studies at high risk, and 27.2% at moderate risk | MD -0.01, 95% CI (-0.04,0.03) | Low heterogeneity according to $I^2$ (42.1%) and $P$ (0.12) in direct comparisons No inconsistency between the direct and indirect estimate (Node-split $P= 0.97$ and $\tau= 0.07$ ) | The treatment effects were not significantly influenced by clinical modifiers in the subgroup analyses | Undetectable by the routine method The comparison-adjusted funnel plot for the network is not suggestive of any dominant publication bias | Low (Downgrade by two levels due to study limitations and imprecision)                         |

Supplemental Table 58 Continued

| Comparisons           | Study limitations                                                       | Imprecision                     | Heterogeneity and Inconsistency                                                                                                                                                         | Indirectness                                                                                            | Publication bias                                                                                                                          | Confidence in MD for overall change in TG                              |
|-----------------------|-------------------------------------------------------------------------|---------------------------------|-----------------------------------------------------------------------------------------------------------------------------------------------------------------------------------------|---------------------------------------------------------------------------------------------------------|-------------------------------------------------------------------------------------------------------------------------------------------|------------------------------------------------------------------------|
| Oat bran vs Control   | 0% of the estimate from studies at high risk, and 100% at moderate risk | MD -0.08, 95% CI (-0.12,-0.03)  | Moderate heterogeneity according to $I^2$ (65.5%) and $P$ (0.94) in direct comparisons No inconsistency between the direct and indirect estimate (Node-split $P=0.78$ and $\tau=0.07$ ) | The treatment effects were significantly influenced by some clinical modifiers in the subgroup analyses | Undetectable by the routine method The comparison-adjusted funnel plot for the network is not suggestive of any dominant publication bias | Moderate (Downgrade by three levels due to indirectness)               |
| Wheat vs Control      | 50% of the estimate from studies at high risk, and 25% at moderate risk | MD -0.03, 95% CI (-0.09,0.03)   | Mild heterogeneity according to $I^2$ (0%) and $P$ (1.00) in direct comparisons No inconsistency between the direct and indirect estimate (Node-split $P=0.90$ and $\tau=0.07$ )        | The treatment effects were not significantly influenced by clinical modifiers in the subgroup analyses  | Undetectable by the routine method The comparison-adjusted funnel plot for the network is not suggestive of any dominant publication bias | Low (Downgrade by two levels due to study limitations and imprecision) |
| Wheat bran vs Control | 50% of the estimate from studies at high risk, and 50% at moderate risk | MD , 95% CI -0.12 (-0.19,-0.05) | Mild heterogeneity according to $I^2$ (0%) and $P$ (0.34) in direct comparisons No inconsistency between the direct and indirect estimate (Node-split $P=0.90$ and $\tau=0.07$ )        | The treatment effects were not significantly influenced by clinical modifiers in the subgroup analyses  | Undetectable by the routine method The comparison-adjusted funnel plot for the network is not suggestive of any dominant publication bias | Low (Downgrade by two levels due to study limitations and imprecision) |

Supplemental Table 58 Continued

| Comparisons     | Study limitations                                                       | Imprecision                   | Heterogeneity and Inconsistency                                                                                                                                                      | Indirectness                                                                                           | Publication bias                                                                                                                          | Confidence in MD for overall change in TG            |
|-----------------|-------------------------------------------------------------------------|-------------------------------|--------------------------------------------------------------------------------------------------------------------------------------------------------------------------------------|--------------------------------------------------------------------------------------------------------|-------------------------------------------------------------------------------------------------------------------------------------------|------------------------------------------------------|
| Barley vs Oat   | 0% of the estimate from studies at high risk, and 100% at moderate risk | MD -0.01, 95% CI (-0.09,0.06) | Low heterogeneity according to $I^2$ (41.4%) and $P$ (0.52) in direct comparisons No inconsistency between the direct and indirect estimate (Node-split $P= 0.81$ and $\tau= 0.07$ ) | The treatment effects were not significantly influenced by clinical modifiers in the subgroup analyses | Undetectable by the routine method The comparison-adjusted funnel plot for the network is not suggestive of any dominant publication bias | Moderate (Downgrade by one level due to imprecision) |
| Barley vs Wheat | 0% of the estimate from studies at high risk, and 100% at moderate risk | MD 0.01, 95% CI (-0.08,0.10)  | Only one head-to-head study, and no heterogeneity No inconsistency between the direct and indirect estimate (Node-split $P= 0.87$ and $\tau=0.07$ )                                  | The treatment effects were not significantly influenced by clinical modifiers in the subgroup analyses | Undetectable by the routine method The comparison-adjusted funnel plot for the network is not suggestive of any dominant publication bias | Moderate (Downgrade by one level due to imprecision) |
| Oat vs Oat bran | 0% of the estimate from studies at high risk, and 100% at moderate risk | MD 0.07, 95% CI (0.02,0.12)   | Mild heterogeneity according to $I^2$ (0%) and $P$ (0.88) in direct comparisons No inconsistency between the direct and indirect estimate (Node-split $P= 0.44$ and $\tau= 0.07$ )   | The treatment effects were not significantly influenced by clinical modifiers in the subgroup analyses | Undetectable by the routine method The comparison-adjusted funnel plot for the network is not suggestive of any dominant publication bias | High                                                 |

Supplemental Table 58 Continued

| Comparisons            | Study limitations                                                       | Imprecision                   | Heterogeneity and Inconsistency                                                                                                                                                         | Indirectness                                                                                           | Publication bias                                                                                                                          | Confidence in MD for overall change in TG                                            |
|------------------------|-------------------------------------------------------------------------|-------------------------------|-----------------------------------------------------------------------------------------------------------------------------------------------------------------------------------------|--------------------------------------------------------------------------------------------------------|-------------------------------------------------------------------------------------------------------------------------------------------|--------------------------------------------------------------------------------------|
| Oat vs Wheat           | 0% of the estimate from studies at high risk, and 100% at moderate risk | MD 0.02, 95% CI (-0.04,0.09)  | High heterogeneity according to $I^2$ (77.6%) and $P$ (0.02) in direct comparisons No inconsistency between the direct and indirect estimate (Node-split $P=0.95$ and $\tau=0.07$ )     | The treatment effects were not significantly influenced by clinical modifiers in the subgroup analyses | Undetectable by the routine method The comparison-adjusted funnel plot for the network is not suggestive of any dominant publication bias | Low (Downgrade by two levels due to imprecision and Heterogeneity and Inconsistency) |
| Oat bran vs Wheat      | 0% of the estimate from studies at high risk, and 50% at moderate risk  | MD -0.05, 95% CI (-0.12,0.02) | Mild heterogeneity according to $I^2$ (0%) and $P$ (0.54) in direct comparisons No inconsistency between the direct and indirect estimate (Node-split $P=0.79$ and $\tau=0.07$ )        | The treatment effects were not significantly influenced by clinical modifiers in the subgroup analyses | Undetectable by the routine method The comparison-adjusted funnel plot for the network is not suggestive of any dominant publication bias | Moderate (Downgrade by one level due to imprecision)                                 |
| Oat bran vs Wheat bran | 0% of the estimate from studies at high risk, and 100% at moderate risk | MD 0.04, 95% CI (-0.02,0.10)  | Moderate heterogeneity according to $I^2$ (57.7%) and $P$ (0.05) in direct comparisons No inconsistency between the direct and indirect estimate (Node-split $P=0.78$ and $\tau=0.07$ ) | The treatment effects were significantly influenced by clinical modifiers in the subgroup analyses     | Undetectable by the routine method The comparison-adjusted funnel plot for the network is not suggestive of any dominant publication bias | Low (Downgrade by two levels due to imprecision and indirectness)                    |

<sup>a</sup>The quality of evidence of network estimates for all outcomes by using the GRADE framework, which characterizes the quality of a body of evidence on the basis of the study limitations, imprecision, inconsistency, indirectness, and publication bias.
